# Supplementary material
Source: PubMed Central journal article supplement (PMC8285081)
Supplement: NIHMS1719559-supplement-Supplement__1.pdf [file NIHMS1719559-supplement-Supplement__1.pdf]

Appendix Table 1. Search Strategy (Results Detailed for PubMed)

| PubMed |                                                                                                                                                                                                                                                                                                                                                                                                                                                                                                                                                                                                                                                                                                                                                                                                                                                                                                                                                                                                                                                                                                                                                                                                                                                                                                                                                                                                                                                                                                                                                                                                                                                                                                                                                                                                                                                                                                                                                                                                                                                                                                                                                                                                                                                                                                                                                                                                                                                                                                                                                                     |           |
|--------|---------------------------------------------------------------------------------------------------------------------------------------------------------------------------------------------------------------------------------------------------------------------------------------------------------------------------------------------------------------------------------------------------------------------------------------------------------------------------------------------------------------------------------------------------------------------------------------------------------------------------------------------------------------------------------------------------------------------------------------------------------------------------------------------------------------------------------------------------------------------------------------------------------------------------------------------------------------------------------------------------------------------------------------------------------------------------------------------------------------------------------------------------------------------------------------------------------------------------------------------------------------------------------------------------------------------------------------------------------------------------------------------------------------------------------------------------------------------------------------------------------------------------------------------------------------------------------------------------------------------------------------------------------------------------------------------------------------------------------------------------------------------------------------------------------------------------------------------------------------------------------------------------------------------------------------------------------------------------------------------------------------------------------------------------------------------------------------------------------------------------------------------------------------------------------------------------------------------------------------------------------------------------------------------------------------------------------------------------------------------------------------------------------------------------------------------------------------------------------------------------------------------------------------------------------------------|-----------|
| Search | Query                                                                                                                                                                                                                                                                                                                                                                                                                                                                                                                                                                                                                                                                                                                                                                                                                                                                                                                                                                                                                                                                                                                                                                                                                                                                                                                                                                                                                                                                                                                                                                                                                                                                                                                                                                                                                                                                                                                                                                                                                                                                                                                                                                                                                                                                                                                                                                                                                                                                                                                                                               | Results   |
| #1     | Hispanic Americans[mesh] OR Spanish Americans[tw] OR Spanish American[tw] OR Puerto Ricans[tw] OR Puerto Rican[tw] OR Latinos[tw] OR Latino[tw] OR Cuban[tw] OR Cubans[tw] OR Hispanics[tw] OR Hispanic[tw] OR Latinas[tw] OR Latina[tw] OR Mexican[tw] OR Mexicans[tw] OR south American[tw] OR central American[tw]                                                                                                                                                                                                                                                                                                                                                                                                                                                                                                                                                                                                                                                                                                                                                                                                                                                                                                                                                                                                                                                                                                                                                                                                                                                                                                                                                                                                                                                                                                                                                                                                                                                                                                                                                                                                                                                                                                                                                                                                                                                                                                                                                                                                                                               | 82,458    |
| #2     | ((adenocarcinoma*[tiab] OR cancer*[tiab] OR carcinoma*[tiab] OR metasta*[tiab] OR neoplasm*[tiab] OR tumor[tiab] OR tumors[tiab] OR tumour[tiab] OR tumours[tiab] OR malignan*[tiab]) AND ("survivors"[Mh] OR survivorship[tiab] OR survivor[tiab] OR survivors[tiab]))                                                                                                                                                                                                                                                                                                                                                                                                                                                                                                                                                                                                                                                                                                                                                                                                                                                                                                                                                                                                                                                                                                                                                                                                                                                                                                                                                                                                                                                                                                                                                                                                                                                                                                                                                                                                                                                                                                                                                                                                                                                                                                                                                                                                                                                                                             | 28,693    |
| #3     | ("poverty"[Mesh] OR "socioeconomic factors"[Mesh] OR "socioeconomic factor"[tiab] OR "socioeconomic factors"[tiab] OR "financial burden"[tw] OR "financial burdens"[tw] OR paying bills OR transportation[mesh] OR transportation[tiab] OR "income"[tiab] OR "work"[tiab] OR "employment"[tw] OR "job"[tiab] OR "jobs"[tiab] OR unemployment[tw] OR "Insurance coverage"[mesh] OR "insurance, health"[mesh] OR "insurance coverage"[tiab] OR "health insurance"[tiab] OR "uninsured"[tiab] OR "underinsured"[tiab] OR "job loss"[tiab] OR Food Supply[tw] OR Food Supplies[tw] OR Food Insecurity[tw] OR Food Insecurities[tw] OR Food Security[tw] OR "Spirituality"[Mesh] OR Spiritual*[tiab] OR "faith"[tiab] OR "religion"[tiab] OR "religiosity"[tiab] OR "hope"[tiab] OR hopes[tw] OR hopefulness[tw] OR satisfaction[tw] OR useful[tw] OR usefulness[tw] OR happiness[tw] OR Adaptation, Psychological[mesh] OR Psychologic Adaptation[tw] OR Psychological Adaptation[tw] OR Coping[tw] OR Adaptive Behavior[tw] OR Adaptive Behaviors[tw] OR "belief"[tiab] OR "uncertainty"[tiab] OR "Stress, Psychological"[Mesh] OR ((Psychologic*[tiab] OR emotion*[tiab] OR life[tiab]) AND stress*[tiab]) OR "Psychological well-being"[tiab] OR "anxiety"[Mesh] OR "anxiety"[tiab] OR "nervousness"[tiab] OR "worry"[tiab] OR "uneasiness"[tiab] OR "uncertainty"[tiab] OR "depression"[Mesh] OR depress*[tiab] OR "fear of recurrence"[tw] OR "fear"[tiab] OR "cognition"[tiab] OR "chemobrain"[tiab] OR "chemo-brain"[tiab] OR "attention"[tw] OR "attentions"[tw] OR Concentration[tw] OR Concentrations[tw] OR memory[tw] OR "mental recall"[tw] OR "distress"[tiab] OR bereavement[tw] OR grief[tw] OR mood[tw] OR anger[mesh] OR anger[tw] OR angry[tw] OR "sense of coherence"[Mesh] OR "sense of coherence"[tiab] OR "Social Adjustment"[Mesh] OR "social adjustment"[tiab] OR "social support"[Mesh] OR "social support"[tiab] OR "social network"[tiab] OR "social networks"[tiab] OR "family"[Mesh] OR "family relations"[Mesh] OR (family[tiab] OR marriage[tiab] OR marital[tiab] OR personal[tiab] AND (relation*[tiab])) OR "sexuality"[tiab] OR Sexual behav*[tiab] OR "appearance"[tiab] OR "Body image"[Mesh] OR "Body image"[tiab] OR "isolation"[tiab] OR "wellness"[tiab] OR "Nausea"[Mesh] OR "Nausea"[tiab] OR constipation[tw] OR appetite[tw] OR appetites[tw] OR "fatigue"[Mesh] OR "fatigue"[tiab] OR "sleep"[Mesh] OR "sleep"[tiab] OR "Sleep Initiation and Maintenance Disorders"[Mesh] OR insomnia*[tiab] OR "early awakening"[tiab] | 7,587,696 |

|    |                                                                                                                                                                                                                                                                                                                                                                                                                                                                                                                                                                                                                                                                                                                                                                                                                                                                                                                                                                                                                                                                                                                                                                                                                                                                                                                                                                                                                                                                                                                                                                                                                                                                                                                                  |     |
|----|----------------------------------------------------------------------------------------------------------------------------------------------------------------------------------------------------------------------------------------------------------------------------------------------------------------------------------------------------------------------------------------------------------------------------------------------------------------------------------------------------------------------------------------------------------------------------------------------------------------------------------------------------------------------------------------------------------------------------------------------------------------------------------------------------------------------------------------------------------------------------------------------------------------------------------------------------------------------------------------------------------------------------------------------------------------------------------------------------------------------------------------------------------------------------------------------------------------------------------------------------------------------------------------------------------------------------------------------------------------------------------------------------------------------------------------------------------------------------------------------------------------------------------------------------------------------------------------------------------------------------------------------------------------------------------------------------------------------------------|-----|
|    | <p>OR "Sleeplessness"[tiab] OR "fertility"[tw] OR menstrual cycle[mesh] OR menstrual cycle[tw] OR menstrual cycles[tw] OR menstruation[tw] OR "Fecundability"[tw] OR "Fecundity"[tw] OR "Pain"[Mesh] OR "pain"[tiab] OR "pains"[tiab] OR "Ache"[tiab] OR "Aches"[tiab] OR "suffering"[tiab] OR "sufferings"[tiab] OR hot flashes[Mesh] OR hot flashes[tiab] OR night sweats[tiab] OR Sexual Dysfunction, Physiological[mesh] OR Sexual Dysfunctions, Psychological[mesh] OR sexual dysfunction[tiab] OR sexual dysfunctions[tiab] OR vaginal dryness[tiab] OR Functional status[tw] OR toxicity[tiab] OR loss of hair[tiab] OR neuropathy OR lymphedema[mesh] OR lymphedema[tiab] OR weight gain[mesh] OR weight gain[tiab] OR body size[mesh] OR body size[tiab] OR body weight[mesh] OR body weight[tiab] OR hair loss[tw] OR nail loss[tw] OR tooth loss[tw] OR loss of teeth[tw] OR skin discoloration[tw] OR discoloration of skin[tw] OR discoloration of the skin[tw] OR taste[tw] OR loss of energy[tw] OR energy loss[tw] OR "Quality of Life"[Mesh] OR "quality of life"[tiab] OR "Life Quality"[tiab] OR "Activities of Daily Living"[Mesh] OR "ADL"[tiab] OR "self-care"[tiab] OR "Health status disparities"[Mesh] OR racial disparit*[tiab] OR EORTC[tiab] OR Patient-Reported Outcomes Measurement Information System[tiab] OR PROMIS[tiab] OR European Quality of life-5 Dimensions[tiab] OR EQ-5D[tiab] OR EuroQOL[tiab] OR Short Form-36[tiab] OR SF-36[tiab] OR Health Utilities Index-III[tiab] OR HUI-III[tiab] OR "self concept"[Mesh] OR self concept[tiab] OR self confidence[tiab] OR (Self[tiab] AND (perception*[tiab] OR esteem*[tiab])) OR "functional assessment"[tiab] OR "well-being"[tiab])</p> |     |
| #4 | #1 AND #2 AND #3                                                                                                                                                                                                                                                                                                                                                                                                                                                                                                                                                                                                                                                                                                                                                                                                                                                                                                                                                                                                                                                                                                                                                                                                                                                                                                                                                                                                                                                                                                                                                                                                                                                                                                                 | 346 |

| EMBASE |                                                                                                                                                                                                                                                                                                                                                                                                                                                                                                                                                                                                                                                                                                                                                                                                                                                                                                                                                                                                                                                                                                                                                                                                                                                                                                                                                                                                                                                                                                                                                                                                                                                                                                                                                                                                                                                                                                                                                                                                                                                                                                                                                                                                                                                                                                                                                                                                                                                                                                                                                                                                                                                                                                                                                                                                                       |            |
|--------|-----------------------------------------------------------------------------------------------------------------------------------------------------------------------------------------------------------------------------------------------------------------------------------------------------------------------------------------------------------------------------------------------------------------------------------------------------------------------------------------------------------------------------------------------------------------------------------------------------------------------------------------------------------------------------------------------------------------------------------------------------------------------------------------------------------------------------------------------------------------------------------------------------------------------------------------------------------------------------------------------------------------------------------------------------------------------------------------------------------------------------------------------------------------------------------------------------------------------------------------------------------------------------------------------------------------------------------------------------------------------------------------------------------------------------------------------------------------------------------------------------------------------------------------------------------------------------------------------------------------------------------------------------------------------------------------------------------------------------------------------------------------------------------------------------------------------------------------------------------------------------------------------------------------------------------------------------------------------------------------------------------------------------------------------------------------------------------------------------------------------------------------------------------------------------------------------------------------------------------------------------------------------------------------------------------------------------------------------------------------------------------------------------------------------------------------------------------------------------------------------------------------------------------------------------------------------------------------------------------------------------------------------------------------------------------------------------------------------------------------------------------------------------------------------------------------------|------------|
| Search | Query                                                                                                                                                                                                                                                                                                                                                                                                                                                                                                                                                                                                                                                                                                                                                                                                                                                                                                                                                                                                                                                                                                                                                                                                                                                                                                                                                                                                                                                                                                                                                                                                                                                                                                                                                                                                                                                                                                                                                                                                                                                                                                                                                                                                                                                                                                                                                                                                                                                                                                                                                                                                                                                                                                                                                                                                                 | Results    |
| #1     | ('hispanic'/exp OR 'mexican american'/exp OR 'puerto rican'/exp OR 'Cuban'/exp OR 'South American'/exp OR 'Central American'/exp OR (Hispanic OR Hispanics OR Mexican OR Mexicans OR latino OR latinos OR Latina OR Latinas OR 'puerto rican' OR 'puerto ricans' OR Cuban OR Cubans OR 'spanish american' OR 'spanish americans' OR 'South American' OR 'South Americans' OR 'Central American' OR 'Central Americans'):ab,ti)                                                                                                                                                                                                                                                                                                                                                                                                                                                                                                                                                                                                                                                                                                                                                                                                                                                                                                                                                                                                                                                                                                                                                                                                                                                                                                                                                                                                                                                                                                                                                                                                                                                                                                                                                                                                                                                                                                                                                                                                                                                                                                                                                                                                                                                                                                                                                                                        | 111,345    |
| #2     | ((('cancer survivor'/exp OR ((cancer* OR adenocarcinoma* OR carcinoma* OR metasta* OR neoplasm* OR tumor OR tumors OR tumour OR tumours OR malignan*) NEAR/3 ('survivors' OR 'survivor' OR 'survivorship')))))                                                                                                                                                                                                                                                                                                                                                                                                                                                                                                                                                                                                                                                                                                                                                                                                                                                                                                                                                                                                                                                                                                                                                                                                                                                                                                                                                                                                                                                                                                                                                                                                                                                                                                                                                                                                                                                                                                                                                                                                                                                                                                                                                                                                                                                                                                                                                                                                                                                                                                                                                                                                        | 29,435     |
| #3     | ('quality of life'/exp OR 'daily life activity'/exp OR 'health disparity'/exp OR 'self concept'/exp OR 'functional assessment'/exp OR 'wellbeing'/exp OR 'nausea and vomiting'/exp OR 'fatigue'/exp OR 'sleep disorder'/exp OR 'female fertility'/exp OR 'cancer pain'/exp OR 'hot flush'/exp OR 'night sweat'/exp OR 'sexual dysfunction'/exp OR 'functional status'/exp OR 'toxicity'/exp OR 'hair loss'/exp OR 'skin discoloration'/exp OR 'neuropathy'/mj OR 'lymphedema'/exp OR 'body weight'/exp OR 'psychological well being'/exp OR 'stress'/exp OR 'constipation'/exp OR 'food intake'/exp OR 'food insecurity'/exp OR 'emotion'/exp OR 'bereavement'/exp OR 'anger'/exp OR 'cognition'/exp OR 'distress syndrome'/exp OR 'social adaptation'/exp OR 'social support'/exp OR 'family'/exp OR 'sexual behavior'/exp OR 'poverty'/exp OR 'socioeconomics'/exp OR 'income'/mj OR 'employment'/exp OR 'unemployment'/exp OR 'insurance'/exp OR 'medically uninsured'/exp OR 'religion'/mj OR ('quality of life' OR 'health related quality of life' OR 'HRQL' OR 'life quality' OR 'activities of daily living' OR 'ADL' OR 'daily living activities' OR 'daily living activity' OR 'daily life activity' OR 'health disparities' OR 'health status disparities' OR 'health status disparity' OR 'EORTC' OR 'Patient-Reported Outcomes Measurement Information System' OR 'PROMIS' OR 'European Quality of life-5 Dimensions' OR 'EQ-5D' OR 'EuroQOL' OR 'short form-36' OR 'SF-36' OR 'health utilities index-III' OR 'HUI-III' OR 'functional assessment' OR 'wellbeing' OR 'well being' OR 'wellness' OR 'nausea' OR 'vomiting' OR 'energy loss' OR 'loss of energy' OR 'fatigue' OR 'tiredness' OR 'sleep disorder' OR 'insomnia' OR 'sleeplessness' OR 'early awakening' OR 'fertility' OR 'fecundability' OR 'fecundity' OR 'cancer pain' OR 'ache' OR 'aches' OR 'hot flush' OR 'hot flash' OR 'hot flashes' OR 'night sweat' OR 'night sweats' OR 'night sweating' OR 'sexual dysfunction' OR 'sexual dysfunctions' OR 'vaginal dryness' OR 'functional status' OR 'functional capacity' OR 'toxicity' OR 'hair loss' OR 'nail loss' OR 'tooth loss' OR 'loss of teeth' OR 'skin discoloration' OR 'discoloration of skin' OR 'neuropathy' OR 'tingling' OR 'lymphedema' OR 'lymph edema' OR 'lymph oedema' OR 'lymphatic edema' OR 'lymphatic oedema' OR 'lymphoedema' OR 'lymphoedema' OR 'lymphostatic edema' OR 'lymphostatic oedema' OR 'weight gain' OR 'weight increase' OR 'weight change' OR 'weight fluctuation' OR 'food intake' OR 'appetite' OR 'appetites' OR 'taste' OR 'constipation' OR 'menstrual' OR 'menstruate' OR menstruation OR 'stress' OR anxiety OR fear OR worry OR nervousness OR depression OR uncertainty OR 'anger' OR 'angry' OR 'fear of recurrence' OR 'cognition' OR | 10,555,279 |

|    |                                                                                                                                                                                                                                                                                                                                                                                                                                                                                                                                                                                                                                                                                                                                                                                                                                                                                                                                                                                                                                                                                                                                                                                                                                                            |     |
|----|------------------------------------------------------------------------------------------------------------------------------------------------------------------------------------------------------------------------------------------------------------------------------------------------------------------------------------------------------------------------------------------------------------------------------------------------------------------------------------------------------------------------------------------------------------------------------------------------------------------------------------------------------------------------------------------------------------------------------------------------------------------------------------------------------------------------------------------------------------------------------------------------------------------------------------------------------------------------------------------------------------------------------------------------------------------------------------------------------------------------------------------------------------------------------------------------------------------------------------------------------------|-----|
|    | 'attention' OR 'attentions' OR concentration OR concentrations OR memory OR 'mental recall' OR 'chemobrain' OR 'distress' OR coping OR suffering OR sufferings OR 'social support' OR 'family' OR 'sexual behavior' OR 'sexuality' OR 'appearance' OR 'body image' OR 'body size' OR 'isolation' OR 'bereavement' OR 'grief' OR mood OR useful OR usefulness OR 'poverty' OR 'socioeconomic' OR 'socioeconomics' OR 'racial disparity' OR 'racial disparities' OR 'financial burden' OR 'income' OR employment OR employed OR unemployment OR unemployed OR insurance OR uninsured OR underinsured OR 'job loss' OR transportation OR 'paying bills' OR religion OR 'spiritual' OR spirituality OR 'faith' OR religion OR religiosity OR hope OR hopefulness OR belief OR uncertainty OR uneasiness OR happiness OR satisfaction):ab,ti) OR ((food) NEAR/3 (security* OR insecurity* OR suppl*)) OR ((self) NEAR/3 (concept* OR percept* OR esteem* OR confidence OR aware* OR image OR rating OR represent* OR care)) OR ((stress) NEAR/3 (emotion* OR life OR psychologic*)) OR ((social) NEAR/3 (adapt* OR adjust* OR responsive* OR sensitive* OR skill* OR support* OR network*)) OR ((relation*) NEAR/3 (family OR marriage OR marital OR personal)) |     |
| #4 | #1 AND #2 AND #3                                                                                                                                                                                                                                                                                                                                                                                                                                                                                                                                                                                                                                                                                                                                                                                                                                                                                                                                                                                                                                                                                                                                                                                                                                           | 709 |
| #5 | #4 AND ('article'/it OR 'article in press'/it OR 'review'/it)                                                                                                                                                                                                                                                                                                                                                                                                                                                                                                                                                                                                                                                                                                                                                                                                                                                                                                                                                                                                                                                                                                                                                                                              | 342 |

| CINAHL    |                                                                                                                                                                                                                                                                                                                                                                                                                                                                                                                                                                                                                                                                                                                                                                                                                                                                                                                                                                                                                                                                                                                                                                                                                                                                                                                                                                                                                                                                                                                                                                                                                                                                                                                                                                                                                                                                                                                                                                                                                                                                                                                                                                                                                                                                                                                          |           |
|-----------|--------------------------------------------------------------------------------------------------------------------------------------------------------------------------------------------------------------------------------------------------------------------------------------------------------------------------------------------------------------------------------------------------------------------------------------------------------------------------------------------------------------------------------------------------------------------------------------------------------------------------------------------------------------------------------------------------------------------------------------------------------------------------------------------------------------------------------------------------------------------------------------------------------------------------------------------------------------------------------------------------------------------------------------------------------------------------------------------------------------------------------------------------------------------------------------------------------------------------------------------------------------------------------------------------------------------------------------------------------------------------------------------------------------------------------------------------------------------------------------------------------------------------------------------------------------------------------------------------------------------------------------------------------------------------------------------------------------------------------------------------------------------------------------------------------------------------------------------------------------------------------------------------------------------------------------------------------------------------------------------------------------------------------------------------------------------------------------------------------------------------------------------------------------------------------------------------------------------------------------------------------------------------------------------------------------------------|-----------|
| Search ID | Query                                                                                                                                                                                                                                                                                                                                                                                                                                                                                                                                                                                                                                                                                                                                                                                                                                                                                                                                                                                                                                                                                                                                                                                                                                                                                                                                                                                                                                                                                                                                                                                                                                                                                                                                                                                                                                                                                                                                                                                                                                                                                                                                                                                                                                                                                                                    | Results   |
| S1        | MH (Hispanics) OR TI (Hispanics OR Hispanic OR Mexican OR Mexicans OR "Puerto Rican" OR "Puerto Ricans" OR Cuban OR Cubans OR "South American" OR "South Americans" OR "Central American" OR "Central Americans" OR Latino OR Latinos OR Latina OR Latinas OR "Spanish American" OR "Spanish Americans") OR AB (Hispanics OR Hispanic OR Mexican OR Mexicans OR "Puerto Rican" OR "Puerto Ricans" OR Cuban OR Cubans OR "South American" OR "South Americans" OR "Central American" OR "Central Americans" OR Latino OR Latinos OR Latina OR Latinas OR "Spanish American" OR "Spanish Americans")                                                                                                                                                                                                                                                                                                                                                                                                                                                                                                                                                                                                                                                                                                                                                                                                                                                                                                                                                                                                                                                                                                                                                                                                                                                                                                                                                                                                                                                                                                                                                                                                                                                                                                                       | 40,260    |
| S2        | MH (cancer survivors OR ("neoplasms" AND "Survivors"))                                                                                                                                                                                                                                                                                                                                                                                                                                                                                                                                                                                                                                                                                                                                                                                                                                                                                                                                                                                                                                                                                                                                                                                                                                                                                                                                                                                                                                                                                                                                                                                                                                                                                                                                                                                                                                                                                                                                                                                                                                                                                                                                                                                                                                                                   | 9,005     |
| S3        | ((cancer* OR adenocarcinoma* OR carcinoma* OR metasta* OR neoplasm* OR tumor OR tumors OR tumour OR tumours OR malignan*) N3 (survivors OR survivor OR survivorship)))                                                                                                                                                                                                                                                                                                                                                                                                                                                                                                                                                                                                                                                                                                                                                                                                                                                                                                                                                                                                                                                                                                                                                                                                                                                                                                                                                                                                                                                                                                                                                                                                                                                                                                                                                                                                                                                                                                                                                                                                                                                                                                                                                   | 13,334    |
| S4        | (S2 OR S3)                                                                                                                                                                                                                                                                                                                                                                                                                                                                                                                                                                                                                                                                                                                                                                                                                                                                                                                                                                                                                                                                                                                                                                                                                                                                                                                                                                                                                                                                                                                                                                                                                                                                                                                                                                                                                                                                                                                                                                                                                                                                                                                                                                                                                                                                                                               | 13,652    |
| S5        | ((MH "Quality of Life+") OR "quality of life" OR "Life quality" OR comfort OR (MH "Activities of daily living+") OR "daily living activities" OR (MH "Health status disparities") (MH "healthcare disparities") OR "health disparit*" OR "Race factors" OR "racial disparity" OR "racial disparities" OR (MH "Religion and Psychology+") OR spirituality OR faith OR religion OR religiosity OR hope OR hopefulness OR hopelessness OR useful OR usefulness OR belief OR Prayer OR "spiritual well-being" OR "psychological well being" OR "well-being" OR wellness OR (MH "Fatigue+") OR fatigue OR "Cancer Fatigue" OR "Hot flashes" OR "hot flushes" OR "night sweats" OR "night sweat" OR (MH "self concept+") OR "Self Esteem" OR "Self Perception" OR "Self Concepts" OR "self-concept" OR "self-perception" OR "self-conscious" OR "self-efficacy" OR (MH "Coping+") OR Coping OR (MH "sexual dysfunction, female+") OR "sexual dysfunction" OR Fertility OR infertility OR "fecundability" OR "fecundity" OR "sexual behavior" OR "sexuality" OR menstrual OR menstruate OR menstruation OR "vaginal dryness" OR "Functional status" OR "functional capacity" OR "drug toxicity" OR "hair loss" OR "nail loss" OR "tooth loss" OR "loss of teeth" OR "skin discoloration" OR "discoloration of skin" OR neuropathy OR tingling OR Lymphoedema OR lymphedema OR Fear OR Anxiety OR worry OR nervousness OR uncertainty OR Depression OR Pain OR ache OR aches OR Mood OR bereavement OR grief OR angry OR anger OR happiness OR unhappiness OR uneasiness OR "energy loss" OR "loss of energy" OR tiredness OR constipation OR Cognition OR attention OR inattention OR concentration OR memory OR "mental recall" OR chemobrain OR "chemo-brain" OR "symptom distress" OR distress OR (MH "body weight changes+") OR "weight gain" OR "weight loss" OR "weight change" OR "weight increase" OR "weight fluctuation" OR appearance OR "body image" OR "body size" OR "food insecurity" OR "food intake" OR appetite OR appetites OR taste OR Affect OR (MH "Emotions+") OR emotional OR suffering OR sufferings OR (MH "Affective Disorders+") OR (MH "social isolation+") OR isolation OR Sleep OR insomnia OR sleeplessness OR "early awakening" OR "Insurance coverage" OR "Medically Uninsured" OR "Financial | 1,717,732 |

|    |                                                                                                                                                                                                                                                                                                                                                                                                                                                                                                                                                                                                                                                                                                                                                                                                                                                                                                                                                                                   |     |
|----|-----------------------------------------------------------------------------------------------------------------------------------------------------------------------------------------------------------------------------------------------------------------------------------------------------------------------------------------------------------------------------------------------------------------------------------------------------------------------------------------------------------------------------------------------------------------------------------------------------------------------------------------------------------------------------------------------------------------------------------------------------------------------------------------------------------------------------------------------------------------------------------------------------------------------------------------------------------------------------------|-----|
|    | Disparit*" OR "financial burden" OR "financial toxicity" OR poverty OR "Income" OR (MH "socioeconomic factors+") OR (MH "Interpersonal relations+") OR "interpersonal relationships" OR Adult-Child Relations OR Caring OR Collaboration OR Criticism OR Dating OR "Dissent and Disputes" OR "Family Conflict" OR Forgiveness OR Friendship OR Intimacy OR Mentorship OR "Nurturing Behavior" OR Patient-Family Relations OR "Peer Pressure" OR (MH Stress+) OR Stress OR EORTC OR "Patient-Reported Outcomes Measurement Information System" OR "PROMIS" OR "European Quality of life-5 Dimensions" OR "EQ-5D" OR "EuroQOL" OR "short form-36" OR "SF-36" OR "health utilities index-III" OR "HUI-III" OR Nausea OR vomiting OR (MH "Support, Psychosocial+") OR "Social support" OR ("Family+") OR family OR (MH "employment+") OR employment OR unemployment OR "job loss" OR "paying bills" OR transportation OR (MH "Insurance+") OR insurance OR uninsured OR underinsured) |     |
| S6 | S1 AND S4 AND S5                                                                                                                                                                                                                                                                                                                                                                                                                                                                                                                                                                                                                                                                                                                                                                                                                                                                                                                                                                  | 255 |
| S7 | S1 AND S4 AND S5 AND Source Types :Academic Journals                                                                                                                                                                                                                                                                                                                                                                                                                                                                                                                                                                                                                                                                                                                                                                                                                                                                                                                              | 224 |

| PsycINFO |                                                                                                                                                                                                                                                                                                                                                                                                                                                                                                                                                                                                                                                                                                                                                                                                                                                                                                                                                                                                                                                                                                                                                                                                                                                                                                                                                                                                                                                                                                                                                                                                                                                                                                                                                                                                                                                                                                                                                                                                                                                                                                                                                                                                                                                                                                                                                                            |           |
|----------|----------------------------------------------------------------------------------------------------------------------------------------------------------------------------------------------------------------------------------------------------------------------------------------------------------------------------------------------------------------------------------------------------------------------------------------------------------------------------------------------------------------------------------------------------------------------------------------------------------------------------------------------------------------------------------------------------------------------------------------------------------------------------------------------------------------------------------------------------------------------------------------------------------------------------------------------------------------------------------------------------------------------------------------------------------------------------------------------------------------------------------------------------------------------------------------------------------------------------------------------------------------------------------------------------------------------------------------------------------------------------------------------------------------------------------------------------------------------------------------------------------------------------------------------------------------------------------------------------------------------------------------------------------------------------------------------------------------------------------------------------------------------------------------------------------------------------------------------------------------------------------------------------------------------------------------------------------------------------------------------------------------------------------------------------------------------------------------------------------------------------------------------------------------------------------------------------------------------------------------------------------------------------------------------------------------------------------------------------------------------------|-----------|
| Search   | Query                                                                                                                                                                                                                                                                                                                                                                                                                                                                                                                                                                                                                                                                                                                                                                                                                                                                                                                                                                                                                                                                                                                                                                                                                                                                                                                                                                                                                                                                                                                                                                                                                                                                                                                                                                                                                                                                                                                                                                                                                                                                                                                                                                                                                                                                                                                                                                      | Results   |
| S1       | DE ("Latinos/Latinas" OR "Mexican Americans") OR TI (Hispanics OR Hispanic OR Mexican OR Mexicans OR "Puerto Rican" OR "Puerto Ricans" OR Cuban OR Cubans OR "South American" OR "South Americans" OR "Central American" OR "Central Americans" OR Latino OR Latinos OR Latina OR Latinas OR "Spanish American" OR "Spanish Americans") OR AB (Hispanics OR Hispanic OR Mexican OR Mexicans OR "Puerto Rican" OR "Puerto Ricans" OR Cuban OR Cubans OR "South American" OR "South Americans" OR "Central American" OR "Central Americans" OR Latino OR Latinos OR Latina OR Latinas OR "Spanish American" OR "Spanish Americans")                                                                                                                                                                                                                                                                                                                                                                                                                                                                                                                                                                                                                                                                                                                                                                                                                                                                                                                                                                                                                                                                                                                                                                                                                                                                                                                                                                                                                                                                                                                                                                                                                                                                                                                                          | 52,908    |
| S2       | ((DE "survivors" AND DE "Neoplasms"))                                                                                                                                                                                                                                                                                                                                                                                                                                                                                                                                                                                                                                                                                                                                                                                                                                                                                                                                                                                                                                                                                                                                                                                                                                                                                                                                                                                                                                                                                                                                                                                                                                                                                                                                                                                                                                                                                                                                                                                                                                                                                                                                                                                                                                                                                                                                      | 2,818     |
| S3       | (cancer* OR adenocarcinoma* OR carcinoma* OR metasta* OR neoplasm* OR tumor OR tumors OR tumour OR tumours OR malignan*) N3 (survivors OR survivor OR survivorship))                                                                                                                                                                                                                                                                                                                                                                                                                                                                                                                                                                                                                                                                                                                                                                                                                                                                                                                                                                                                                                                                                                                                                                                                                                                                                                                                                                                                                                                                                                                                                                                                                                                                                                                                                                                                                                                                                                                                                                                                                                                                                                                                                                                                       | 5,135     |
| S4       | (S2 OR S3)                                                                                                                                                                                                                                                                                                                                                                                                                                                                                                                                                                                                                                                                                                                                                                                                                                                                                                                                                                                                                                                                                                                                                                                                                                                                                                                                                                                                                                                                                                                                                                                                                                                                                                                                                                                                                                                                                                                                                                                                                                                                                                                                                                                                                                                                                                                                                                 | 5,540     |
| S5       | ((("quality of life" OR "health related quality of life" OR "HRQL" OR "life quality" OR "activities of daily living" OR "ADL" OR "daily living activities" OR "daily living activity" OR "daily life activity" OR "health disparities" OR "health status disparities" OR "health status disparity" OR "EORTC" OR "Patient-Reported Outcomes Measurement Information System" OR "PROMIS" OR "European Quality of life-5 Dimensions" OR "EQ-5D" OR "EuroQOL" OR "short form-36" OR "SF-36" OR "health utilities index-III" OR "HUI-III" OR "functional assessment" OR "wellbeing" OR "well being" OR "wellness" OR "nausea" OR "vomiting" OR "energy loss" OR "loss of energy" OR "fatigue" OR "tiredness" OR "sleep disorder" OR "insomnia" OR "sleeplessness" OR "early awakening" OR "fertility" OR "fecundability" OR "fecundity" OR "cancer pain" OR "ache" OR "aches" OR "hot flush" OR "hot flash" OR "hot flashes" OR "night sweat" OR "night sweats" OR "night sweating" OR "sexual dysfunction" OR "sexual dysfunctions" OR "vaginal dryness" OR "functional status" OR "functional capacity" OR "toxicity" OR "hair loss" OR "nail loss" OR "tooth loss" OR "loss of teeth" OR "skin discoloration" OR "discoloration of skin" OR "neuropathy" OR "tingling" OR "lymphedema" OR "lymph edema" OR "lymph oedema" OR "lymphatic edema" OR "lymphatic oedema" OR "lymphoedema" OR "lymphooedema" OR "lymphostatic edema" OR "lymphostatic oedema" OR "weight gain" OR "weight increase" OR "weight change" OR "weight fluctuation" OR "food intake" OR "appetite" OR "appetites" OR "taste" OR "constipation" OR "menstrual" OR "menstruate" OR "menstruation" OR "stress" OR "anxiety" OR "fear" OR "worry" OR "nervousness" OR "depression" OR "uncertainty" OR "anger" OR "angry" OR "fear of recurrence" OR "cognition" OR "attention" OR "attentions" OR "concentration" OR "concentrations" OR "memory" OR "mental recall" OR "chemobrain" OR "distress" OR "coping" OR "suffering" OR "sufferings" OR "social support" OR "family" OR "sexual behavior" OR "sexuality" OR "appearance" OR "body image" OR "body size" OR "isolation" OR "bereavement" OR "grief" OR "mood" OR "useful" OR "usefulness" OR "poverty" OR "socioeconomic" OR "socioeconomics" OR "racial disparity" OR "racial disparities" OR "financial burden" OR "income" OR "employment" OR | 2,375,667 |

|    |                                                                                                                                                                                                                                                                                                                                                                                                                                                                                                                                                                                                                                                                                                                                                                                     |     |
|----|-------------------------------------------------------------------------------------------------------------------------------------------------------------------------------------------------------------------------------------------------------------------------------------------------------------------------------------------------------------------------------------------------------------------------------------------------------------------------------------------------------------------------------------------------------------------------------------------------------------------------------------------------------------------------------------------------------------------------------------------------------------------------------------|-----|
|    | <p> “employed” OR “unemployment” OR “unemployed” OR “insurance” OR<br/> “uninsured” OR “underinsured” OR “job loss” OR “transportation” OR “paying<br/> bills” OR religion OR “spiritual” OR spirituality OR “faith” OR religion OR<br/> religiosity OR hope OR hopefulness OR belief OR uncertainty OR uneasiness OR<br/> happiness OR satisfaction)) OR ((food) N3 (security* OR insecurity* OR suppl*))<br/> OR ((self) N3 (concept* OR percept* OR esteem* OR confidence OR aware* OR<br/> image OR rating OR represent* OR care)) OR ((stress) N3 (emotion* OR life OR<br/> psychologic*)) OR ((social) N3 (adapt* OR adjust* OR responsive* OR sensitive*<br/> OR skill* OR support* OR network*)) OR ((relation*) N3 (family OR marriage OR<br/> marital OR personal))) </p> |     |
| S6 | S1 AND S4 AND S5                                                                                                                                                                                                                                                                                                                                                                                                                                                                                                                                                                                                                                                                                                                                                                    | 223 |
| S7 | S1 AND S4 AND S5 AND Source Types: Academic Journals                                                                                                                                                                                                                                                                                                                                                                                                                                                                                                                                                                                                                                                                                                                                | 182 |
