# Supplementary material
Source: PubMed Central journal article supplement (PMC8285081)
Supplement: NIHMS1719559-supplement-Supplement__2.pdf [file NIHMS1719559-supplement-Supplement__2.pdf]

## Appendix Table 2. Abstraction Table

| First Author, Year<br>(Quality Appraisal Score) | Study Design and Data Collection<br>Methods                                                         | Conceptual<br>Framework               | Participant Characteristics                                                                                                                                                                                                                                                                                                                                                                                                                      | QOL Dimensions                  | Key Findings                                                                                                                                                                                                                                                                                                                                                                   |
|-------------------------------------------------|-----------------------------------------------------------------------------------------------------|---------------------------------------|--------------------------------------------------------------------------------------------------------------------------------------------------------------------------------------------------------------------------------------------------------------------------------------------------------------------------------------------------------------------------------------------------------------------------------------------------|---------------------------------|--------------------------------------------------------------------------------------------------------------------------------------------------------------------------------------------------------------------------------------------------------------------------------------------------------------------------------------------------------------------------------|
| Aguado, 2013[1]<br><br>(21/22)                  | <p><b>Study Design:</b> Quantitative Cross-Sectional</p> <p><b>Data Collection:</b><br/>Survey</p>  | Ecological Model for Health Promotion | <p><b>Sample Size:</b> 68</p> <p><b>Participant Characteristics:</b><br/>Average Age (SD): 55.4, (10.4)<br/>Gender:<br/>Male, 0%<br/>Female, 100%<br/>Race/ Ethnicity:<br/>Latino/a, 100%<br/>Non-Hispanic White, 0%<br/>Non-Hispanic Black, 0%<br/>Asian, 0%<br/>Cancer Type(s): Breast<br/>Survivorship Timing (Mean): 33.6<br/>Stratified by Latino/a Subgroups: Y</p>                                                                        | Psychological, Social           | Almost half (45.6%) of Latina women reported depressive symptoms. In multivariate analyses, risk factors identified were mainly at the intrapersonal level to include psychosocial (sociodemographic and cognitive) and a cancer-related risk factor, but no sociocultural factors.                                                                                            |
| Armbruster, S. D. 2018 [2]<br><br>(19/22)       | <p><b>Study Design:</b><br/>Quantitative Longitudinal</p> <p><b>Data Collection:</b><br/>Survey</p> | Not reported                          | <p><b>Sample Size:</b> 95</p> <p><b>Participant Characteristics:</b><br/>Age Range: 25-76<br/>Gender:<br/>Male, 0.0%<br/>Female, 100.0%<br/>Race/ Ethnicity:<br/>Latino/a, 13.0%<br/>Non-Hispanic White, 75.0%<br/>Non-Hispanic Black, 6.0%<br/>Asian, 5.0%<br/>American Indian: 1.0%<br/>Cancer Type(s): Endometrial<br/>Survivorship Timing : 26.4 months<br/>Stratified by Latino/a Subgroups: No</p>                                         | Physical                        | Among a diverse sample of endometrial cancer survivors, there were no racial/ethnic differences in sleep quality (p-value=0.644) at baseline.                                                                                                                                                                                                                                  |
| Arpawong, T. E., 2013[3]<br><br>(18/22)         | <p><b>Study Design:</b> Quantitative Cross-Sectional</p> <p><b>Data collection:</b><br/>Survey</p>  | Not reported                          | <p><b>Sample Size:</b> 94</p> <p><b>Participant Characteristics:</b><br/>Average Age (SD): 14.8, (2.74)<br/>Gender:<br/>Male, 52%<br/>Female, 48%<br/>Race/ Ethnicity:<br/>Latino/a, 47%<br/>Non-Hispanic White, 44%<br/>Non-Hispanic Black, 0%<br/>Asian, 0%<br/>Other, 11%<br/>Cancer Type(s): Leukemia, lymphoma, CNS tumor, bone tumor, soft tissue tumor<br/>Survivorship Timing (Range): &lt;6<br/>Stratified by Latino/a Subgroups: N</p> | Physical, Psychological, Social | Both psychosocial function and post-traumatic stress symptoms were positively associated with PTG. However both physical functioning and depressive symptoms were negatively associated with PTG. Overall, PTG was significant lower among Hispanic survivors who primarily spoke English at home compared to Hispanics who primarily spoke Spanish at home and non-Hispanics. |

|                                                |                                                                                                          |                                                                  |                                                                                                                                                                                                                                                                                                                                                                                                                            |                                                   |                                                                                                                                                                                                                                                                                                                                         |
|------------------------------------------------|----------------------------------------------------------------------------------------------------------|------------------------------------------------------------------|----------------------------------------------------------------------------------------------------------------------------------------------------------------------------------------------------------------------------------------------------------------------------------------------------------------------------------------------------------------------------------------------------------------------------|---------------------------------------------------|-----------------------------------------------------------------------------------------------------------------------------------------------------------------------------------------------------------------------------------------------------------------------------------------------------------------------------------------|
| <p>Ashing, K, 2014[4]<br/>(21/22)</p>          | <p><b>Study design:</b> Quantitative Longitudinal</p> <p><b>Data collection:</b><br/>Survey</p>          | <p>Contextual Model of HRQOL, Cognitive Behavioral Framework</p> | <p><b>Sample Size:</b> 199<br/><b>Participant Characteristics:</b><br/>Average Age (SD): 52.9, (10.5)<br/>Gender:<br/>Male, 0%<br/>Female, 100%<br/>Race/ Ethnicity:<br/>Latino/a, 100%<br/>Non-Hispanic White, 0%<br/>Non-Hispanic Black, 0%<br/>Asian, 0%<br/>Cancer Type(s): Breast<br/>Survivorship Timing (Range): 12-72<br/>Stratified by Latino/a Subgroups: N</p>                                                  | <p>Psychological</p>                              | <p>Hispanic breast cancer survivors enrolled into the intervention demonstrated a statistically significant decrease in depressive symptoms compared to Hispanic breast cancer survivors enrolled into the control group.</p>                                                                                                           |
| <p>Ashing, K. T., 2018 [5]<br/>(21/22)</p>     | <p><b>Study Design:</b><br/>Quantitative Cross-sectional<br/><b>Data Collection:</b><br/>Survey</p>      | <p>Not reported</p>                                              | <p><b>Sample Size:</b> 116<br/><b>Participant Characteristics:</b><br/><b>Age Mean (SD):</b> 43.0 (5.4)<br/><b>Gender:</b><br/>Male, 0.0%<br/>Female, 100.0%<br/><b>Race/ Ethnicity:</b><br/>Latino/a, 79.3%<br/>Non-Hispanic White, 0.0%<br/>Non-Hispanic Black, 20.7%<br/>Asian, 0.0%<br/><b>Cancer Type(s):</b> Breast<br/><b>Survivorship Timing:</b> 12-72 months<br/><b>Stratified by Latino/a Subgroups:</b> No</p> | <p>Physical, Psychological, Social, Overall</p>   | <p>There was a statistically significant difference in emotional well-being across ethnic groups, with Spanish-language preferred Latinas reporting lower emotional well-being than African-Americans, and Spanish-language preferred Latinas reporting lower functional well-being compared to English language-preferred Latinas.</p> |
| <p>Ashing-Giwa K.T, 2013[6]<br/>(21/22)</p>    | <p><b>Study design:</b><br/>Quantitative Cross-Sectional<br/><br/><b>Data Collection:</b><br/>Survey</p> | <p>Contextual Model of HRQOL</p>                                 | <p><b>Sample Size:</b> 232<br/><b>Participant Characteristics:</b><br/>Average Age (SD): 53, (10.6)<br/>Gender:<br/>Male, 0%<br/>Female, 100%<br/>Race/ Ethnicity:<br/>Latino/a, 100%<br/>Non-Hispanic White, 0%<br/>Non-Hispanic Black, 0%<br/>Asian, 0%<br/>Cancer Type(s): Breast<br/>Survivorship Timing (Range): 12-60<br/>Stratified by Latino/a Subgroups: N</p>                                                    | <p>Physical, Psychological, Social, Spiritual</p> | <p>Over half of Hispanic breast cancer survivors reported elevated depressive symptoms. Education, physical functioning, social support, family stress, functional stress, social functioning, and Spanish language preference were significantly associated with depressive symptoms.</p>                                              |
| <p>Ashing-Giwa, K. T., 2008[7]<br/>(21/22)</p> | <p><b>Study Design:</b><br/>Quantitative Longitudinal<br/><br/><b>Data Collection:</b><br/>Survey</p>    | <p>Not reported</p>                                              | <p><b>Sample Size:</b> 666<br/><b>Participant Characteristics:</b><br/>Average Age (SD): 50, (12)<br/>Gender:<br/>Male, 0%<br/>Female, 100%<br/>Race/ Ethnicity:<br/>Latino/a, 43.09%<br/>Non-Hispanic European American, 40.99%<br/>Non-Hispanic African American, 7.66%<br/>Asian, 8.26%<br/>Cancer Type(s): Cervical</p>                                                                                                | <p>Physical, Social, Psychological, Overall</p>   | <p>The intervention led to increased physical well-being and overall QOL in the intervention group. There was a trend towards improvements in family/social well-being, emotional well-being, and functional well-being in the intervention group, but it was not statistically significant.</p>                                        |

|                                            |                                                                                                              |                                                    |                                                                                                                                                                                                                                                                                                                                                                                                                                                                                                  |                                                |                                                                                                                                                                                                                                                                                                                                                                                                                                                                                                                                                                                                                                                                                                                                   |
|--------------------------------------------|--------------------------------------------------------------------------------------------------------------|----------------------------------------------------|--------------------------------------------------------------------------------------------------------------------------------------------------------------------------------------------------------------------------------------------------------------------------------------------------------------------------------------------------------------------------------------------------------------------------------------------------------------------------------------------------|------------------------------------------------|-----------------------------------------------------------------------------------------------------------------------------------------------------------------------------------------------------------------------------------------------------------------------------------------------------------------------------------------------------------------------------------------------------------------------------------------------------------------------------------------------------------------------------------------------------------------------------------------------------------------------------------------------------------------------------------------------------------------------------------|
|                                            |                                                                                                              |                                                    | Survivorship Timing (Range): 12-60<br>Stratified by Latino/a Subgroups: N                                                                                                                                                                                                                                                                                                                                                                                                                        |                                                |                                                                                                                                                                                                                                                                                                                                                                                                                                                                                                                                                                                                                                                                                                                                   |
| Ashing-Giwa, K. T., 2004[8]<br><br>(9/10)  | <b>Study Design:</b><br>Qualitative<br><br><b>Data Collection:</b><br>Focus groups; Key informant interviews | Not reported                                       | <b>Sample Size:</b> 51<br><b>Participant Characteristics:</b><br>Average Age (SD): Not Specified for Total. African Americans: 33 (no S.D.), Caucasians: 56, (no S.D.), Asian American: 48, (no S.D.), Latina: 47, (no S.D.)<br>Gender:<br>Male, 0%<br>Female, 100%<br>Race/ Ethnicity:<br>Latino/a, 50.98%<br>Non-Hispanic White, 9.80%<br>Non-Hispanic Black, 19.61%<br>Asian, 19.61%<br>Cancer Type(s): Cervical<br>Survivorship Timing (Range): 0-120<br>Stratified by Latino/a Subgroups: N | Physical, Psychological, Social, and Spiritual | Latina cervical cancer survivors reported depending on spouses for providing emotional and financial stability. They also found support and relief through church and religious faith (peace, prayers). Compared to Whites, African Americans and Asians, Latina CCS more likely to take blame for their diagnosis and viewed it as form of punishment and death sentence. Latina and Asian CCS extremely concerned with cancer effects on fertility and appearance (hair loss). Compared to other groups, Latinas expressed more negative feelings about adverse effect on their bodies (self-image) and impact on their relationships. Latina CCS also reported depression and anxiety; many feared shame and social isolation. |
| Ashing-Giwa K. T., 2010[9]<br><br>(19/22)  | <b>Study Design:</b><br>Quantitative Cross-Sectional<br><br><b>Data Collection:</b><br>Survey                | Impact of functional strain on emotional wellbeing | <b>Sample Size:</b> 626<br><b>Participant Characteristics:</b><br>Average Age (SD): 52, (no S.D.)<br>Gender:<br>Male, 0%<br>Female, 100%<br>Race/ Ethnicity:<br>European-American, 24.60%<br>African-American, 19.33%<br>Latina-American, 26.52%<br>Asian-American, 29.55%<br>Cancer Type(s): Breast<br>Survivorship Timing (Mean): 34.8<br>Stratified by Latino/a Subgroups: N                                                                                                                  | Physical, Psychological, Social                | Compared to Whites, African Americans, and Asian Americans, Latina breast cancer survivors showed the worst scores in functional strain variables (family, functional and geographic stress). Latinas more likely to report a change in their marital status after their breast cancer diagnosis (OR 4.09; 95% CI, 1.70–9.78). Latinas reported lowest work capability level of all ethnic groups (p=0.003). With regards to family burden component of functional strain, Whites and African Americans were more likely to live alone relative to Latinas and Asians.                                                                                                                                                            |
| Ashing-Giwa K.T., 2010[10]<br><br>(20/22)  | <b>Study Design:</b><br>Quantitative Cross-Sectional<br><br><b>Data Collection:</b><br>Survey                | Contextual Model of HRQOL                          | <b>Sample Size:</b> 703<br><b>Participant Characteristics:</b><br>Average Age (SD): 55.0, (11.3)<br>Gender:<br>Male, 0%<br>Female, 100%<br>Race/ Ethnicity:<br>Latino/a, 26.0%<br>Non-Hispanic European, 25.5%<br>Non-Hispanic African, 19.2%<br>Asian, 29.3%<br>Cancer Type(s): Breast<br>Survivorship Timing (Mean): 36<br>Stratified by Latino/a Subgroups: N                                                                                                                                 | Physical, Psychological, Social                | Direct impact of psychological well-being on physical QOL was consistent across racial/ethnic groups. Life burden indirectly influenced physical QOL through psychological well-being for all ethnic groups. In a structural equation model, Latinas demonstrated a significant relationship between patient-doctor relationship and social support.                                                                                                                                                                                                                                                                                                                                                                              |
| Ashing-Giwa K. T., 2011[11]<br><br>(19/22) | <b>Study Design:</b><br>Quantitative Cross-Sectional<br><br><b>Data Collection:</b><br>Survey                | Not reported                                       | <b>Sample Size:</b> 703<br><b>Participant Characteristics:</b><br>Average Age (SD): 55, (11.3)<br>Gender:<br>Male, 0%<br>Female, 100%<br>Race/ Ethnicity:                                                                                                                                                                                                                                                                                                                                        | Psychological                                  | Latina cancer survivors had less favorable emotional outcomes than Whites, African Americans and Asian Americans. Survivors who self-identified as Latina and who were monolingual (speaking Spanish) were more likely to report that "I feel sad," "I am satisfied with how I am coping with my                                                                                                                                                                                                                                                                                                                                                                                                                                  |

|                                         |                                                                                                        |                           |                                                                                                                                                                                                                                                                                                                                                                                                                                      |                                            |                                                                                                                                                                                                                                                                                                                                                                                                       |
|-----------------------------------------|--------------------------------------------------------------------------------------------------------|---------------------------|--------------------------------------------------------------------------------------------------------------------------------------------------------------------------------------------------------------------------------------------------------------------------------------------------------------------------------------------------------------------------------------------------------------------------------------|--------------------------------------------|-------------------------------------------------------------------------------------------------------------------------------------------------------------------------------------------------------------------------------------------------------------------------------------------------------------------------------------------------------------------------------------------------------|
|                                         |                                                                                                        |                           | <p>Latino/a, 26.03%</p> <p>European, 25.46%</p> <p>African, 19.20%</p> <p>Asian, 29.30%</p> <p>Cancer Type(s): Breast</p> <p>Survivorship Timing (Mean): 36</p> <p>Stratified by Latino/a Subgroups: N</p>                                                                                                                                                                                                                           |                                            | illness," and "I worry that my condition will get worse," compared to other groups.                                                                                                                                                                                                                                                                                                                   |
| Ashing-Giwa K.T, 2011[12]<br>(20/22)    | <p><b>Study Design:</b><br/>Quantitative Cross-Sectional</p> <p><b>Data Collection:</b><br/>Survey</p> | Contextual Model of HRQOL | <p><b>Sample Size:</b> 560</p> <p><b>Participant Characteristics:</b></p> <p>Average Age (SD): 49.46, (12.1)</p> <p>Gender:</p> <p>Male, 0%</p> <p>Female, 100%</p> <p>Race/ Ethnicity:</p> <p>Latina, 51.25%</p> <p>European, 48.75%</p> <p>Non-Hispanic Black, 0%</p> <p>Asian, 0%</p> <p>Cancer Type(s): Cervical</p> <p>Survivorship Timing (Mean): 39.48</p> <p>Stratified by Latino/a Subgroups: N</p>                         | Psychological, Physical, Overall, Social   | This study demonstrated some ethnic differences for predictors of QOL. European Americans showed significant associations between radiation therapy and HRQOL. Among Latina Americans, life burden (i.e., financial strains, employment, family stress, and neighborhood stress) was associated with sexual impact; and the patient-doctor relationship was associated with psychological well-being. |
| Ashing-Giwa, K. T., 2010[13]<br>(19/22) | <p><b>Study Design:</b><br/>Quantitative Cross-Sectional</p> <p><b>Data Collection:</b><br/>Survey</p> | Not reported              | <p><b>Sample Size:</b> 922</p> <p><b>Participant Characteristics:</b></p> <p>Average Age (SD): Not Specified</p> <p>Gender:</p> <p>Male, 0</p> <p>Female, 100%</p> <p>Race/ Ethnicity:</p> <p>Latina, 50.98%</p> <p>European, 49.02%</p> <p>Non-Hispanic Black, 0%</p> <p>Asian, 0%</p> <p>Cancer Type(s): Breast, cervical</p> <p>Survivorship Timing (Not Specified): Not Specified</p> <p>Stratified by Latino/a Subgroups: N</p> | Physical, Psychological, Social, Spiritual | Survivors reporting low total physical well-being levels (> 40%) tended to be Spanish-speaking. Compared to Latinas, European American were less likely to express low physical well-being symptoms.                                                                                                                                                                                                  |
| Ashing-Giwa, K. T., 2006[14]<br>(9/10)  | <p><b>Study Design:</b><br/>Qualitative</p> <p><b>Data Collection:</b><br/>Focus Groups</p>            | Not reported              | <p><b>Sample Size:</b> 26</p> <p><b>Participant Characteristics:</b></p> <p>Average Age (SD): 56, (no S.D.)</p> <p>Gender:</p> <p>Male, 0%</p> <p>Female, 100%</p> <p>Race/ Ethnicity:</p> <p>Latino/a, 100%</p> <p>Non-Hispanic White, 0%</p> <p>Non-Hispanic Black, 0%</p> <p>Asian, 0%</p> <p>Cancer Type(s): Breast</p> <p>Survivorship Timing (Mean): 48</p> <p>Stratified by Latino/a Subgroups: N</p>                         | Physical, Psychological, Social, Spiritual | Latina breast cancer survivors reported relying heavily on Spirituality to cope with their breast cancer diagnosis. Latinas also discussed emotional distress and psychosocial concerns related to worrying about their children or burdening the family, as well as body image and sexual health concerns.                                                                                           |
| Ashing-Giwa, K. T., 2006[15]<br>(9/10)  | <p><b>Study Design:</b><br/>Qualitative</p> <p><b>Data Collection:</b><br/>Focus Groups</p>            | Not reported              | <p><b>Sample Size:</b> 20</p> <p><b>Participant Characteristics:</b></p> <p>Average Age (SD): 56, (no S.D.)</p> <p>Gender:</p> <p>Male, 0%</p>                                                                                                                                                                                                                                                                                       | Physical, Psychological, Social, Spiritual | Latina cervical cancer survivors reported that cultural and family factors are important for coping with a cancer diagnosis, and Latinas reported strong reliance on spirituality and faith. Fear of                                                                                                                                                                                                  |

|                                                    |                                                                                                                          |                                  |                                                                                                                                                                                                                                                                                                                                                                                                                                                                                                                                                                                                                     |                                                                 |                                                                                                                                                                                                                                                                                                                                                                      |
|----------------------------------------------------|--------------------------------------------------------------------------------------------------------------------------|----------------------------------|---------------------------------------------------------------------------------------------------------------------------------------------------------------------------------------------------------------------------------------------------------------------------------------------------------------------------------------------------------------------------------------------------------------------------------------------------------------------------------------------------------------------------------------------------------------------------------------------------------------------|-----------------------------------------------------------------|----------------------------------------------------------------------------------------------------------------------------------------------------------------------------------------------------------------------------------------------------------------------------------------------------------------------------------------------------------------------|
|                                                    |                                                                                                                          |                                  | <p>Female, 100%</p> <p>Race/ Ethnicity:<br/>         Latino/a, 100%<br/>         Non-Hispanic White, 0%<br/>         Non-Hispanic Black, 0%<br/>         Asian, 0%</p> <p>Cancer Type(s): Cervical<br/>         Survivorship Timing (Not Specified): Not Specified<br/>         Stratified by Latino/a Subgroups: N</p>                                                                                                                                                                                                                                                                                             |                                                                 | <p>recurrence and persistent pain were reported, in addition to worry about job loss and the financial and emotional welfare of their family. Finally, Latina women discussed the negative effect on body image and sexual health that they face.</p>                                                                                                                |
| <p>Ashing-Giwa, K. T., 2004[16]</p> <p>(9/10)</p>  | <p><b>Study Design:</b><br/>         Qualitative</p> <p><b>Data Collection:</b><br/>         Focus Groups</p>            | <p>Not reported</p>              | <p><b>Sample Size:</b> 102</p> <p><b>Participant Characteristics:</b><br/>         Age Range: 28-75<br/>         Gender:<br/>         Male, 0%<br/>         Female, 100%</p> <p>Race/ Ethnicity:<br/>         African American, 23.53%<br/>         Korean Monolingual, 10.78%<br/>         Chinese Monolingual, 9.80%<br/>         Asian Bilingual, 12.75%<br/>         Caucasians, 11.76%<br/>         American Monolingual, 4.90%<br/>         Latina, 25.49%</p> <p>Cancer Type(s): Breast<br/>         Survivorship Timing (Not Specified): Not Specified<br/>         Stratified by Latino/a Subgroups: N</p> | <p>Physical, Psychological, Social, Spiritual</p>               | <p>Latina breast cancer survivors reported actively participating in culturally and linguistically appropriate support groups; Latina women reported that spirituality is significant to their quality of life. In addition, Latina women in particular noted they experienced serious job disruptions and financial hardships due to cancer and its treatments.</p> |
| <p>Ashing-Giwa, K. T., 2007[17]</p> <p>(20/22)</p> | <p><b>Study Design:</b><br/>         Quantitative Cross-Sectional</p> <p><b>Data Collection:</b><br/>         Survey</p> | <p>Contextual Model of HRQOL</p> | <p><b>Sample Size:</b> 703</p> <p><b>Participant Characteristics:</b><br/>         Average Age (SD): 55, (no S.D.)<br/>         Gender:<br/>         Male, 0%<br/>         Female, 100%</p> <p>Race/ Ethnicity:<br/>         Latino/a, 26.0%<br/>         Non-Hispanic European American, 25.5%<br/>         Non-Hispanic African American, 19.2%<br/>         Asian, 29.3%</p> <p>Cancer Type(s): Breast<br/>         Survivorship Timing (Mean): 36<br/>         Stratified by Latino/a Subgroups: N</p>                                                                                                          | <p>Physical, Psychological, Social</p>                          | <p>In a cohort of multiethnic breast cancer survivors, Hispanic women reported the lowest outcomes for physical well-being, emotional well-being, and social/family well-being compared to non-Hispanic Whites.</p>                                                                                                                                                  |
| <p>Ashing-Giwa, K. T., 2009[18]</p> <p>(19/22)</p> | <p><b>Study Design:</b><br/>         Quantitative Cross-Sectional</p> <p><b>Data Collection:</b><br/>         Survey</p> | <p>Contextual Model of HRQOL</p> | <p><b>Sample Size:</b> 560</p> <p><b>Participant Characteristics:</b><br/>         Average Age (SD): 49, (12.17)<br/>         Gender:<br/>         Male, 0%<br/>         Female, 100%</p> <p>Race/ Ethnicity:<br/>         Latino/a, 51.25%<br/>         Non-Hispanic European-American, 48.75%<br/>         Non-Hispanic Black, 0%<br/>         Asian, 0%</p> <p>Cancer Type(s): Cervical<br/>         Survivorship Timing (Mean): 39.6<br/>         Stratified by Latino/a Subgroups: N</p>                                                                                                                       | <p>Psychological, Social, Psychological, Spiritual, Overall</p> | <p>In a cohort of cervical cancer survivors, Spanish speaking Latina-Americans reported poorer overall HRQOL, functional, emotional, and social/family wellbeing compared to European-Americans, even after adjusting for covariates. This may indicate a greater level of disease burden who may be newer immigrants and/or are of lower SES.</p>                   |

|                                                     |                                                                                                                       |                             |                                                                                                                                                                                                                                                                                                                                                                                                                                                                                                                                                          |                                                   |                                                                                                                                                                                                                                                                                                                                                                                                                                                                                                                                                                                                                                                                                            |
|-----------------------------------------------------|-----------------------------------------------------------------------------------------------------------------------|-----------------------------|----------------------------------------------------------------------------------------------------------------------------------------------------------------------------------------------------------------------------------------------------------------------------------------------------------------------------------------------------------------------------------------------------------------------------------------------------------------------------------------------------------------------------------------------------------|---------------------------------------------------|--------------------------------------------------------------------------------------------------------------------------------------------------------------------------------------------------------------------------------------------------------------------------------------------------------------------------------------------------------------------------------------------------------------------------------------------------------------------------------------------------------------------------------------------------------------------------------------------------------------------------------------------------------------------------------------------|
| <p>Ayala-Feliciano, M., 2011[19]</p> <p>(17/22)</p> | <p><b>Study Design:</b> Quantitative Cross-Sectional</p> <p><b>Data Collection:</b><br/>In-person<br/>Observation</p> | <p>Not reported</p>         | <p><b>Sample Size:</b> 38<br/><b>Participant Characteristics:</b><br/>Age Range: 30-64<br/>Gender:<br/>Male, 0%<br/>Female, 100%<br/>Race/ Ethnicity:<br/>Latino/a, 100%<br/>Non-Hispanic White, 0%<br/>Non-Hispanic Black, 0%<br/>Asian, 0%<br/>Cancer Type(s): Breast<br/>Survivorship Timing (Not Specified): Not Specified<br/>Stratified by Latino/a Subgroups: N</p>                                                                                                                                                                               | <p>Psychological, Social, Spiritual</p>           | <p>Compared to their non-cancer counterparts (or women who did not get chemotherapy), Latina cancer survivors had reduced neurocognitive performance in visuospatial memory. Latina breast cancer survivors had higher denial-based coping strategies than non-breast cancer participants (p=0.05). Among survivors, problem focused coping was associated with reduced performance in the GPT (psychomotor speed).</p>                                                                                                                                                                                                                                                                    |
| <p>Aziz, N. M., 2002[20]</p> <p>(N/A)</p>           | <p><b>Study Design:</b><br/>Review</p> <p><b>Data collection:</b><br/>N/A</p>                                         | <p>Not reported</p>         | <p>N/A</p>                                                                                                                                                                                                                                                                                                                                                                                                                                                                                                                                               | <p>Physical, Psychological, Social, Spiritual</p> | <p>According to one study, only 26% of Hispanic prostate cancer survivors reported firm erections (sexual function) compared to 38% among Black men and 21% among White men (p=0.001). Another study reported that Hispanic breast cancer survivors had stronger concerns related to recurrence, pain, death, harm from adjuvant treatment, and bills compared to their White and African American counterparts. A review suggested that Hispanic and African American cancer patients are more religious and benefit more from religious coping strategies than Whites. Informal social support was reported as being more important for Hispanics and African Americans than Whites.</p> |
| <p>Badger, TA., 2013[21]</p> <p>(18/22)</p>         | <p><b>Study Design:</b> Quantitative Longitudinal</p> <p><b>Data collection:</b><br/>Survey</p>                       | <p>Stress Process Model</p> | <p><b>Sample Size:</b> 160 (80 survivors, 80 partners)<br/><b>Participant Characteristics:</b><br/>Average Age (SD): Survivor: 47.34, (10.5); Partner: 42.74, (12.7)<br/>Gender:<br/>Male, Survivor: 0%, Partner: 46.3%<br/>Female, Survivor: 100%, Partner: 53.8%<br/>Race/ Ethnicity:<br/>Latino/a, Survivor: 100%, Partner: 93.8%<br/>Non-Hispanic White, Survivor: 0%, Partner: 6.3%<br/>Non-Hispanic Black, 0%<br/>Asian, 0%<br/>Cancer Type(s): Breast<br/>Survivorship Timing (Mean, in weeks): 27.74<br/>Stratified by Latino/a Subgroups: N</p> | <p>Social, Physical, Psychological, Spiritual</p> | <p>Among a cohort of Latina breast cancer survivors and their supportive partners, two telephone-delivered interventions (one health education, one interpersonal counseling) were found to improve psychological, physical, social, and spiritual QOL among both LCS and their supportive partners.</p>                                                                                                                                                                                                                                                                                                                                                                                   |
| <p>Badger, 2020 [22]</p> <p>(20/22)</p>             | <p><b>Study Design:</b> Quantitative Longitudinal</p> <p><b>Data collection:</b><br/>Survey</p>                       | <p>Not reported</p>         | <p><b>Sample Size:</b> 230<br/><b>Participant Characteristics:</b><br/>Age Range: Not Specified for all survivors<br/>Gender:<br/>Male, 0%<br/>Female, 100%<br/>Race/ Ethnicity:<br/>Latino/a, 100%<br/>Non-Hispanic White, 0.0%</p>                                                                                                                                                                                                                                                                                                                     | <p>Psychological, Social</p>                      | <p>This study was designed to compare the effectiveness of two psychosocial interventions for improving QOL in Latinas with breast cancer and their family caregivers. Among survivors, the Telephone Interpersonal Counseling intervention produced lower adjusted mean depression scores compared to the Symptom Health Education intervention at 2 months. Social</p>                                                                                                                                                                                                                                                                                                                   |

|                                                 |                                                                                                           |              |                                                                                                                                                                                                                                                                                                                                                                                                                                                                                                                                               |                                            |                                                                                                                                                                                                                                                                                                                                            |
|-------------------------------------------------|-----------------------------------------------------------------------------------------------------------|--------------|-----------------------------------------------------------------------------------------------------------------------------------------------------------------------------------------------------------------------------------------------------------------------------------------------------------------------------------------------------------------------------------------------------------------------------------------------------------------------------------------------------------------------------------------------|--------------------------------------------|--------------------------------------------------------------------------------------------------------------------------------------------------------------------------------------------------------------------------------------------------------------------------------------------------------------------------------------------|
|                                                 |                                                                                                           |              | <p>Non-Hispanic Black, 0.0%</p> <p>Cancer Type(s): Breast</p> <p>Survivorship Timing: ≤12 months</p> <p>Stratified by Latino/a Subgroups: No</p>                                                                                                                                                                                                                                                                                                                                                                                              |                                            | isolation among survivors improved over baseline at months 2, 4 and 6 in both groups.                                                                                                                                                                                                                                                      |
| <p>Banas, J. R., 2017[23]</p> <p>(9/10)</p>     | <p><b>Study Design:</b><br/>Qualitative</p> <p><b>Data Collection:</b><br/>Focus Groups</p>               | Not reported | <p><b>Sample Size:</b> 31 (30 survivors, 1 caregiver)</p> <p><b>Participant Characteristics:</b><br/>Average Age (SD): 54.6, (11.0)</p> <p>Gender:<br/>Male, 100% Caregiver, 6.67% Survivors<br/>Female, 0% Caregiver, 93.33% Survivors</p> <p>Race/ Ethnicity:<br/>Latino/a, 100%<br/>Non-Hispanic White, 0%<br/>Non-Hispanic Black, 0%<br/>Asian, 0%</p> <p>Cancer Type(s): Breast, Hodgkin's lymphoma, Leukemia, Multiple myeloma</p> <p>Survivorship Timing (Not Specified): Not Specified</p> <p>Stratified by Latino/a Subgroups: Y</p> | Physical, Psychological, Social, Spiritual | Hispanic cancer patients expressed a greater number of psychosocial needs (e.g., in areas such as distress, burden, depression, hopelessness, and lack of social/emotional support) compared to other treatment-related side-effects like hair loss, hot flashes, pain and nausea.                                                         |
| <p>Barden, S. M., 2016[24]</p> <p>(9/10)</p>    | <p><b>Study Design:</b><br/>Qualitative</p> <p><b>Data collection:</b><br/>Semi-structured interviews</p> | Not reported | <p><b>Sample Size:</b> 7</p> <p><b>Participant Characteristics:</b><br/>Age Range: 45-69</p> <p>Gender:<br/>Male, 0%<br/>Female, 100%</p> <p>Race/ Ethnicity:<br/>Latino/a, 100%<br/>Non-Hispanic White, 0%<br/>Non-Hispanic Black, 0%<br/>Asian, 0%</p> <p>Cancer Type(s): Breast</p> <p>Survivorship Timing (Range): 36+</p> <p>Stratified by Latino/a Subgroups: N</p>                                                                                                                                                                     | Physical, Psychological, Social, Spiritual | Cultural values of Hispanics have both benefitted and hindered patients. For example, perspective of accepting the diagnoses contributed to positive emotions such as hopefulness; however cultural values such as fatalismo (belief that cancer is out of control) contributed to feelings of powerlessness, heightened anxiety and fear. |
| <p>Bellizzi, K. M., 2012[25]</p> <p>(20/22)</p> | <p><b>Study Design:</b><br/>Quantitative Cross-Sectional</p> <p><b>Data Collection:</b><br/>Survey</p>    | Not reported | <p><b>Sample Size:</b> 1071</p> <p><b>Participant Characteristics:</b><br/>Average Age (SD): 75.5, (6.1)</p> <p>Gender:<br/>Male, 38.4%<br/>Female, 61.6%</p> <p>Race/ Ethnicity:<br/>Latino/a, 19.6%<br/>Non-Hispanic White, 33.6%<br/>Non-Hispanic Black, 24.3%<br/>Asian, 22.4%</p> <p>Cancer Type(s): Breast, prostate, colorectal, gynecologic</p> <p>Survivorship Timing (Mean): 108</p> <p>Stratified by Latino/a Subgroups: N</p>                                                                                                     | Physical, Psychological                    | Race/ethnicity may be related to physical functioning beyond socioeconomic status alone. Hispanic cancer survivors had higher physical functioning compared to African American or Asian cancer survivors.                                                                                                                                 |

|                                     |                                                                                                        |              |                                                                                                                                                                                                                                                                                                                                                                                                                                    |                                 |                                                                                                                                                                                                                                                                                                                                                                                                                                                                                                                                                                               |
|-------------------------------------|--------------------------------------------------------------------------------------------------------|--------------|------------------------------------------------------------------------------------------------------------------------------------------------------------------------------------------------------------------------------------------------------------------------------------------------------------------------------------------------------------------------------------------------------------------------------------|---------------------------------|-------------------------------------------------------------------------------------------------------------------------------------------------------------------------------------------------------------------------------------------------------------------------------------------------------------------------------------------------------------------------------------------------------------------------------------------------------------------------------------------------------------------------------------------------------------------------------|
| Bevilacqua, L. A. 2018 [26]         | <p><b>Study Design:</b><br/>Quantitative Cross-sectional</p> <p><b>Data Collection:</b><br/>Survey</p> | Not reported | <p><b>Sample Size:</b> 1012</p> <p><b>Participant Characteristics:</b><br/>Age Mean (SD): 62.96 (14.5)<br/>Gender:<br/>Male, 33.0%<br/>Female, 77.0%<br/>Race/ Ethnicity:<br/>Hispanic/Latino/a, 10.0%<br/>Non-Hispanic/Latino, 66.0%<br/>Unknown:,24.0%<br/>Cancer Type(s): Breast, Colorectal, Thoracic, Urologic<br/>Survivorship Timing: Not Specified<br/>Stratified by Latino/a Subgroups: No</p>                            | Physical, Psychological         | In unadjusted analyses, patients who identified as ethnically Hispanic/Latino reported significantly higher rates of depression than non-Hispanic/Latino patients (16.3% vs 8.4%; p-value= .012), Average depression scores were also significantly greater for Hispanic/Latino compared to non-Hispanic/Latino patient s(M = 4.84 vs. M = 3.03, p-value P < .001). There were no differences in pain or fatigue scores by ethnicity. In adjusted models, After adjustment, Hispanic/Latino patients had mean PHQ score 1.70 points higher than non-Hispanic/Latino patients. |
| Black, D. S. 2018 [27]              | <p><b>Study Design:</b><br/>Quantitative Cross-sectional</p> <p><b>Data Collection:</b><br/>Survey</p> | Not reported | <p><b>Sample Size:</b> 89</p> <p><b>Participant Characteristics:</b><br/>Age Mean (SD): 60.5 (10.3)<br/>Gender:<br/>Male, 62.0%<br/>Female, 38.0%<br/>Race/ Ethnicity:<br/>Latino/a, 100.0%<br/>Non-Hispanic White, 0.0%<br/>Non-Hispanic Black, 0.0%<br/>Cancer Type(s): Colorectal<br/>Survivorship Timing: 34.8 months<br/>Stratified by Latino/a Subgroups: No</p>                                                             | Physical                        | The sample of Hispanic colorectal cancer survivors, average fatigue levels were similar to previous levels found among survivor samples (range, 5-12) 24 and for population-based norms (mean, 8.4; SD, 3.6),25 Approximately 18% of the study sample demonstrated fatigue global scores equivalent to the national norm for chronically unhealthy individuals.                                                                                                                                                                                                               |
| Blinder,V., 2013[28]<br><br>(N/A)   | <p><b>Study Design:</b><br/>Review</p> <p><b>Data Collection:</b><br/>N/A</p>                          | Not reported | N/A                                                                                                                                                                                                                                                                                                                                                                                                                                | Physical, Social, Psychological | Hispanics may experience higher levels of distress and poorer Social quality of life compared to non-Hispanic patients. Hispanic ethnicity has been found to be associated with greater worry about cancer recurrence compared to non-Hispanic Whites and some evidence that Hispanics have greater issues with sexual functioning long after diagnosis.                                                                                                                                                                                                                      |
| Blinder, V., 2012[29]<br><br>(8/10) | <p><b>Study Design:</b><br/>Qualitative</p> <p><b>Data Collection:</b><br/>Focus Groups</p>            | Not reported | <p><b>Sample Size:</b> 23</p> <p><b>Participant Characteristics:</b><br/>Average Age (Median): 57<br/>Gender:<br/>Male, 0%<br/>Female, 100%<br/>Race/ Ethnicity:<br/>Latino/a, 13.04%<br/>Non-Hispanic White, 13.04%<br/>African-American, 13.04%<br/>African-Caribbean, 21.74%<br/>Chinese, 21.74%<br/>Filipina, 17.39%<br/>Cancer Type(s): Breast<br/>Survivorship Timing (Mean): 60<br/>Stratified by Latino/a Subgroups: Y</p> | Psychological                   | A Hispanic women focus group described fear of cancer as a concern, and this theme did not come up in other race/ethnic-specific focus groups.                                                                                                                                                                                                                                                                                                                                                                                                                                |



|                                             |                                                                                                        |                                  |                                                                                                                                                                                                                                                                                                                                                                                                                                                         |                                                   |                                                                                                                                                                                                                                                                                                                                                                                   |
|---------------------------------------------|--------------------------------------------------------------------------------------------------------|----------------------------------|---------------------------------------------------------------------------------------------------------------------------------------------------------------------------------------------------------------------------------------------------------------------------------------------------------------------------------------------------------------------------------------------------------------------------------------------------------|---------------------------------------------------|-----------------------------------------------------------------------------------------------------------------------------------------------------------------------------------------------------------------------------------------------------------------------------------------------------------------------------------------------------------------------------------|
| <p>Blinder, V. S., 2012[30]<br/>(19/22)</p> | <p><b>Study Design:</b><br/>Quantitative Longitudinal</p> <p><b>Data Collection:</b><br/>Survey</p>    | <p>Not reported</p>              | <p><b>Sample Size:</b> 290<br/><b>Participant Characteristics:</b><br/>Average Age (SD): Not Specified for total (White median: 53; Latina median: 49)<br/>Gender:<br/>Male, 0%<br/>Female, 100%<br/>Race/ Ethnicity:<br/>Latino/a, 62%<br/>Non-Hispanic White, 38%<br/>Non-Hispanic Black, 0%<br/>Asian, 0%<br/>Cancer Type(s): Breast<br/>Survivorship Timing (Longitudinal assessment timing): 6, 18, 36<br/>Stratified by Latino/a Subgroups: N</p> | <p>Physical, Psychological, Social</p>            | <p>At 6 and 18 months post-diagnosis, Latinas were less likely than non-Latina whites to be working. Moreover, Latinas were more likely to be manual laborers than were non-Latina whites. The return to work rate of low-income Latinas and non-Latinas was less than 60% at 36 months.</p>                                                                                      |
| <p>Blinder, V., 2017[31]<br/>(19/22)</p>    | <p><b>Study Design:</b><br/>Quantitative Longitudinal</p> <p><b>Data Collection:</b><br/>Survey</p>    | <p>Not reported</p>              | <p><b>Sample Size:</b> 267<br/><b>Participant Characteristics:</b><br/>Average Age (SD): Not Specified<br/>Gender:<br/>Male, 0%<br/>Female, 100%<br/>Race/ Ethnicity:<br/>Latino/a, 31%<br/>Non-Hispanic White, 20%<br/>Non-Hispanic Black, 21%<br/>Chinese, 19%<br/>Korean, 10%<br/>Cancer Type(s): Breast<br/>Survivorship Timing (Not Specified): Not Specified<br/>Stratified by Latino/a Subgroups: N</p>                                          | <p>Social</p>                                     | <p>There were no significant differences between Hispanic breast cancer survivors and non-Hispanic whites in terms of job retention or likelihood of having an accommodating employer. However, when controlling for race/ethnicity in multivariate analysis, job retention was associated with being more acculturated, which may have implications for diverse populations.</p> |
| <p>Blinder, V., 2013[32]<br/>(19/22)</p>    | <p><b>Study Design:</b><br/>Quantitative Longitudinal</p> <p><b>Data Collection:</b><br/>Survey</p>    | <p>Not reported</p>              | <p><b>Sample Size:</b> 274<br/><b>Participant Characteristics:</b><br/>Average Age (Median): 49<br/>Gender:<br/>Male, 0%<br/>Female, 100%<br/>Race/ Ethnicity:<br/>Latino/a, 53%<br/>Non-Hispanic White, 33%<br/>Non-Hispanic Black, 0%<br/>Asian, 0%<br/>Other, 14%<br/>Cancer Type(s): Breast<br/>Survivorship Timing (Longitudinal assessment timing): 6, 18, 36, 60<br/>Stratified by Latino/a Subgroups: N</p>                                     | <p>Social</p>                                     | <p>Hispanic ethnicity was associated with never returning to work following a cancer diagnosis, with Hispanic women having more than 3 times the odds as non-Hispanic whites of never reporting return to work compared to working at 6-months.</p>                                                                                                                               |
| <p>Bloom, J. R., 2013[33]<br/>(18/22)</p>   | <p><b>Study Design:</b><br/>Quantitative Cross-Sectional</p> <p><b>Data Collection:</b><br/>Survey</p> | <p>Contextual Model of HRQOL</p> | <p><b>Sample Size:</b> 745<br/><b>Participant Characteristics:</b><br/>Average Age (SD): Not Specified for total sample (Euro-American: 57.1, (10.0); Latina English: 56.7, (10.3); Latina Spanish: 54.9 (10.2))<br/>Gender:<br/>Male, 0%<br/>Female, 100%</p>                                                                                                                                                                                          | <p>Physical, Psychological, Social, Spiritual</p> | <p>In unadjusted analyses, Euro-American women reported higher physical, social, and psychological domains compared to English and Spanish speaking Latina women. There were no statistically significant differences for spiritual QOL. In adjusted analyses, ethnicity/language was not associated with physical or psychological well-being,</p>                               |

|                                                 |                                                                                                           |                      |                                                                                                                                                                                                                                                                                                                                                                                                                                                                                                                             |                                         |                                                                                                                                                                                                                                                                                                                                                                                                                                                            |
|-------------------------------------------------|-----------------------------------------------------------------------------------------------------------|----------------------|-----------------------------------------------------------------------------------------------------------------------------------------------------------------------------------------------------------------------------------------------------------------------------------------------------------------------------------------------------------------------------------------------------------------------------------------------------------------------------------------------------------------------------|-----------------------------------------|------------------------------------------------------------------------------------------------------------------------------------------------------------------------------------------------------------------------------------------------------------------------------------------------------------------------------------------------------------------------------------------------------------------------------------------------------------|
|                                                 |                                                                                                           |                      | <p>Race/ Ethnicity:<br/>         Latino/a, 46.85%<br/>         Non-Hispanic Euro-American, 53.15%<br/>         Non-Hispanic Black, 0%<br/>         Asian, 0%</p> <p>Cancer Type(s): Breast<br/>         Survivorship Timing (Median): 24<br/>         Stratified by Latino/a Subgroups: N</p>                                                                                                                                                                                                                               |                                         | <p>although both English and Spanish-speaking Latinas reported higher spiritual well-being and Spanish-speaking Latinas reported poorer social well-being compared with Euro-Americans.</p>                                                                                                                                                                                                                                                                |
| <p>Borrayo, 2020 [34]<br/><br/>(9/10)</p>       | <p><b>Study Design:</b><br/>Qualitative</p> <p><b>Data Collection:</b><br/>Semi-structured interviews</p> | <p>Not Specified</p> | <p><b>Sample Size:</b> 9 (survivors)<br/> <b>Participant Characteristics:</b><br/>         Age Range: Mean: 61.8<br/>         Gender:<br/>         Male, 55.6%<br/>         Female, 44.4%<br/>         Race/ Ethnicity:<br/>         Latino/a, 100%<br/>         Non-Hispanic White, 0%<br/>         Non-Hispanic Black, 0%<br/>         Asian, 0%<br/>         Cancer Type(s): Lung, head and neck<br/>         Survivorship Timing: Not specified<br/>         Stratified by Latino/a Subgroups: N</p>                    | <p>Psychological, Social, Spiritual</p> | <p>These Latino survivors of lung and head and neck cancer primarily identified sociocultural factors as an asset or challenge (e.g., the presence or lack of social support from family, inclination to protect family members from emotional pain); patients also mentioned the importance of spirituality in dealing with their diagnosis. The most prevalent mental health challenges among these patients included: depression, anxiety and fear.</p> |
| <p>Bowen, D. J., 2007[35]<br/><br/>(19/22)</p>  | <p><b>Study Design:</b><br/>Quantitative Longitudinal</p> <p><b>Data Collection:</b><br/>Survey</p>       | <p>Not reported</p>  | <p><b>Sample Size:</b> 804<br/> <b>Participant Characteristics:</b><br/>         Average Age (SD): 55.5, (10.4)<br/>         Gender:<br/>         Male, 0%<br/>         Female, 100%<br/>         Race/ Ethnicity:<br/>         Latino/a, 11.8%<br/>         Non-Hispanic White, 60.4%<br/>         Non-Hispanic Black, 24.8%<br/>         Asian, 0%<br/>         Other, 3.0%<br/>         Cancer Type(s): Breast<br/>         Survivorship Timing (Mean): 40.5 months<br/>         Stratified by Latino/a Subgroups: N</p> | <p>Physical, Social, Psychological</p>  | <p>Hispanic women reported higher physical functional scores compared to Black women, but reported lower mental health scores compared to Black women. Moreover, low-income Latinas may have less employment flexibility compared to Non-Latina whites.</p>                                                                                                                                                                                                |
| <p>Brisbois, M.D., 2014[36]<br/><br/>(9/10)</p> | <p><b>Study Design:</b><br/>Mixed-Methods</p> <p><b>Data Collection:</b><br/>Interviews</p>               | <p>Not reported</p>  | <p><b>Sample Size:</b> 20<br/> <b>Participant Characteristics:</b><br/>         Average Age (SD): Not reported<br/>         Gender:<br/>         Male, 0%<br/>         Female, 100%<br/>         Race/ Ethnicity:<br/>         Latino/a, 100%<br/>         Non-Hispanic White, 0%<br/>         Non-Hispanic Black, 0%<br/>         Asian, 0%<br/>         Cancer Type(s): Breast<br/>         Survivorship Timing (Mean): 55.2<br/>         Stratified by Latino/a Subgroups: N</p>                                         | <p>Physical, Psychological</p>          | <p>Hispanic women with low acculturation scores expressed the impact of barriers on their ability to integrate their breast cancer experience with the chemotherapy-induced premature menopause. Screening for social isolation, anxiety, depression, and measuring acculturation levels may further provide social supports for this population.</p>                                                                                                      |

|                                                    |                                                                                                     |                                  |                                                                                                                                                                                                                                                                                                                                                                                                                                                                                        |                                                   |                                                                                                                                                                                                                                                                                                                                                                                                                                                                                                                                       |
|----------------------------------------------------|-----------------------------------------------------------------------------------------------------|----------------------------------|----------------------------------------------------------------------------------------------------------------------------------------------------------------------------------------------------------------------------------------------------------------------------------------------------------------------------------------------------------------------------------------------------------------------------------------------------------------------------------------|---------------------------------------------------|---------------------------------------------------------------------------------------------------------------------------------------------------------------------------------------------------------------------------------------------------------------------------------------------------------------------------------------------------------------------------------------------------------------------------------------------------------------------------------------------------------------------------------------|
| <p>Buki, L. P., 2008[37]</p> <p>(9/10)</p>         | <p><b>Study Design:</b><br/>_Qualitative</p> <p><b>Data collection:</b><br/>Focus Groups</p>        | <p>Not reported</p>              | <p><b>Sample Size:</b> 18</p> <p><b>Participant Characteristics:</b><br/>Average Age (SD): 51.22, (9.58)</p> <p>Gender:<br/>Male, 0%<br/>Female, 100%</p> <p>Race/ Ethnicity:<br/>Latino/a, 100%<br/>Non-Hispanic White, 0%<br/>Non-Hispanic Black, 0%<br/>Asian, 0%</p> <p>Cancer Type(s): Breast</p> <p>Survivorship Timing (Not Specified): Not Specified</p> <p>Stratified by Latino/a Subgroups: Y</p>                                                                            | <p>Psychological, Social, Spiritual, Physical</p> | <p>Hispanic breast cancer survivors in the re-entry stage of survivorship reported psychological and physical impacts including financial stress, side effects of chemotherapy (e.g., nausea). Limited access to health care, belief in the irreplaceability of a mothers' role and fatalistic beliefs added to the burden Hispanic women experience following a breast cancer diagnosis. Hispanic women who reported lacking social support were less confident in their treatment choices and less optimistic about the future.</p> |
| <p>Buki, L. P., 2016[38]</p> <p>(10/10)</p>        | <p><b>Study Design:</b><br/>Qualitative</p> <p><b>Data Collection:</b><br/>Focus Groups</p>         | <p>Not reported</p>              | <p><b>Sample Size:</b> 27</p> <p><b>Participant Characteristics:</b><br/>Average Age (SD): 51.56, (9.12)</p> <p>Gender:<br/>Male, 0%<br/>Female, 100%</p> <p>Race/ Ethnicity:<br/>Latino/a, 100%<br/>Non-Hispanic White, 0%<br/>Non-Hispanic Black, 0%<br/>Asian, 0%</p> <p>Cancer Type(s): Breast</p> <p>Survivorship Timing (Range): 0-96</p> <p>Stratified by Latino/a Subgroups: Y</p>                                                                                             | <p>Psychological, Social, Spiritual</p>           | <p>Two themes of lived body image experiences: loss/ reconstructions and process of getting body image acceptance.</p>                                                                                                                                                                                                                                                                                                                                                                                                                |
| <p>Burg, M. A., 2015[39]</p> <p>(10/10; 22/22)</p> | <p><b>Study design:</b><br/>Mixed-Methods</p> <p><b>Data Collection:</b><br/>Survey</p>             | <p>Not reported</p>              | <p><b>Sample Size:</b> 1514</p> <p><b>Participant Characteristics:</b><br/>Age Range: 24-97</p> <p>Gender:<br/>Male, 34.6%<br/>Female, 65.4%</p> <p>Race/ Ethnicity:<br/>Latino/a, 12.1%<br/>Non-Hispanic White, 70.1%<br/>Non-Hispanic Black, 12.7%<br/>Asian, 0%<br/>Other, 5.1%</p> <p>Cancer Type(s): Breast, prostate, colorectal, bladder, uterine, skin melanoma</p> <p>Survivorship Timing (Approximate Groups): 24, 60, or 120</p> <p>Stratified by Latino/a Subgroups: N</p> | <p>Physical, Psychological, Social</p>            | <p>Black and Hispanic respondents had more cancer-related financial problems than other groups (Whites and "other" group). Found 15 themes of current unmet needs for long-term cancer survivors, with the top including: physical, financial, personal control, and psychological needs.</p>                                                                                                                                                                                                                                         |
| <p>Buscemi, 2019 [40]</p> <p>(19/22)</p>           | <p><b>Study Design:</b><br/>Quantitative Longitudinal</p> <p><b>Data Collection:</b><br/>Survey</p> | <p>Supportive Accountability</p> | <p><b>Sample Size:</b> 22</p> <p><b>Participant Characteristics:</b><br/>Age Mean: 54.6 (Spanish language preference) 48.7 (English language preference)</p> <p>Gender:<br/>Male, 0.0%<br/>Female, 100%</p> <p>Race/ Ethnicity:<br/>Latino/a, 100%<br/>Non-Hispanic White, 0.0%</p>                                                                                                                                                                                                    | <p>Overall</p>                                    | <p>In this pilot intervention study that assessed the effectiveness of a Smartphone application aimed at improving HRQoL among Hispanic breast cancer survivors, Latina breast cancer survivors' scores on overall HRQoL improved from Week 1 (average score-15.6, SD=4.5) to Week 4 (M=19.4, SD=4.55). However, changes in HRQoL were not statistically significant.</p>                                                                                                                                                             |

|                                                |                                                                                                           |                              |                                                                                                                                                                                                                                                                                                                                                                                                                                                                |                                  |                                                                                                                                                                                                                                                                                                                                          |
|------------------------------------------------|-----------------------------------------------------------------------------------------------------------|------------------------------|----------------------------------------------------------------------------------------------------------------------------------------------------------------------------------------------------------------------------------------------------------------------------------------------------------------------------------------------------------------------------------------------------------------------------------------------------------------|----------------------------------|------------------------------------------------------------------------------------------------------------------------------------------------------------------------------------------------------------------------------------------------------------------------------------------------------------------------------------------|
|                                                |                                                                                                           |                              | <p>Non-Hispanic Black, 0.0%</p> <p>Cancer Type(s): Breast</p> <p>Survivorship Timing: Not Specified</p> <p>Stratified by Latino/a Subgroups: No</p>                                                                                                                                                                                                                                                                                                            |                                  |                                                                                                                                                                                                                                                                                                                                          |
| <p>Campesino, M., 2009[41]</p> <p>(9/10)</p>   | <p><b>Study design:</b><br/>Qualitative</p> <p><b>Data Collection:</b><br/>Interviews</p>                 | Not reported                 | <p><b>Sample Size:</b> 5</p> <p><b>Participant Characteristics:</b><br/>Average Age (SD): 76.4<br/>Gender:<br/>Male, 40%<br/>Female, 60%<br/>Race/ Ethnicity:<br/>Latino/a (Mexican-American), 100%<br/>Non-Hispanic White, 0%<br/>Non-Hispanic Black, 0%<br/>Asian, 0%<br/>Cancer Type(s): Breast, prostate, kidney, ovary, and mouth<br/>Survivorship Timing (Range): 24-132<br/>Stratified by Latino/a Subgroups: N</p>                                     | Psychological, Social, Spiritual | Survivors' emotional reaction to their cancer ranged from denial to acceptance to equanimity. Most participants used prayer to allay fear and petition for good outcomes. Patients had at least one family member that was involved in their care.                                                                                       |
| <p>Canada, A. L., 2013[42]</p> <p>(22/22)</p>  | <p><b>Study design:</b><br/>Quantitative Cross-Sectional</p> <p><b>Data Collection:</b></p>               | Not reported                 | <p><b>Sample Size:</b> 8405</p> <p><b>Participant Characteristics:</b><br/>Average Age (SD): Not Reported<br/>Gender:<br/>Male, 44.9%<br/>Female, 55.1%<br/>Race/ Ethnicity:<br/>Latino/a, 7.9%<br/>Non-Hispanic White, 81.2%<br/>Non-Hispanic Black, 10.9%<br/>Asian, 0%<br/>Cancer Type(s): Breast, prostate, colorectal, bladder, uterine, melanoma<br/>Survivorship Timing (Range): 24-120<br/>Stratified by Latino/a Subgroups: N</p>                     | Spiritual, Physical              | Hispanic cancer survivors had higher scores on Peace compared to Whites, and lower scores compared to Blacks. Hispanics had lower scores for Meaning than Blacks but there no significant differences in Meaning scores between Hispanics and Whites. On Faith, Hispanics had higher scores than Whites but lower scores than Blacks.    |
| <p>Carrion, I. V., 2017[43]</p> <p>(10/10)</p> | <p><b>Study Design:</b><br/>Qualitative</p> <p><b>Data Collection:</b><br/>Semi-Structured Interviews</p> | Explanatory Model of Illness | <p><b>Sample Size:</b> 60</p> <p><b>Participant Characteristics:</b><br/>Average Age (Median): 55<br/>Gender:<br/>Male, 25%<br/>Female, 75%<br/>Race/ Ethnicity:<br/>Latino/a, 100%<br/>Non-Hispanic White, 0%<br/>Non-Hispanic Black, 0%<br/>Asian, 0%<br/>Cancer Type(s): Breast, ovarian, prostate, other (throat, thyroid, stomach, skin, brain, colorectal, and lung)<br/>Survivorship Timing (Range): &lt;60<br/>Stratified by Latino/a Subgroups: Y</p> | Psychological, Social, Spiritual | Themes of coping included: positive reframing, family support, religion/spirituality, and health-care provider support specific to Latinos. Family support facilitated coping among Latino/as. Religion and spirituality allowed Latino/as to cope with a cancer diagnosis, which is a distinct difference from the concept of fatalism. |
| <p>Carver, C.S., 2006[44]</p> <p>(19/22)</p>   | <p><b>Study Design:</b><br/>Quantitative Cross-Sectional</p> <p><b>Data Collection:</b></p>               | Not reported                 | <p><b>Sample Size:</b> 163</p> <p><b>Participant Characteristics:</b><br/>Average Age 54.18, (10.61)<br/>Gender:</p>                                                                                                                                                                                                                                                                                                                                           | Social, Physical, Psychological  | Hispanic breast cancer survivor women reported more frequent negative feelings, more social avoidance, greater distress about family's future, and greater fear of                                                                                                                                                                       |

|                                            |                                                                                                                                   |              |                                                                                                                                                                                                                                                                                                                                                                                                                                                                                                                                                                                                                                   |                                            |                                                                                                                                                                                                                                                                                                                                                                                                                                                                                                                                                                                                                        |
|--------------------------------------------|-----------------------------------------------------------------------------------------------------------------------------------|--------------|-----------------------------------------------------------------------------------------------------------------------------------------------------------------------------------------------------------------------------------------------------------------------------------------------------------------------------------------------------------------------------------------------------------------------------------------------------------------------------------------------------------------------------------------------------------------------------------------------------------------------------------|--------------------------------------------|------------------------------------------------------------------------------------------------------------------------------------------------------------------------------------------------------------------------------------------------------------------------------------------------------------------------------------------------------------------------------------------------------------------------------------------------------------------------------------------------------------------------------------------------------------------------------------------------------------------------|
|                                            | Surveys                                                                                                                           |              | <p>Male, 0%<br/>Female, 100%</p> <p>Race/ Ethnicity:<br/>Latino/a, 20%<br/>Non-Hispanic White, 70%<br/>Non-Hispanic Black, 10%<br/>Asian, 0%</p> <p>Cancer Type(s): Breast<br/>Survivorship Timing (Not Specified): Not Specified<br/>Stratified by Latino/a Subgroups: N</p>                                                                                                                                                                                                                                                                                                                                                     |                                            | recurrence compared to non-Hispanic women at a 13-year follow-up.                                                                                                                                                                                                                                                                                                                                                                                                                                                                                                                                                      |
| Casillas, J. N., 2006[45]<br>(8/10; 20/22) | <p><b>Study design:</b><br/>Mixed-Methods</p> <p><b>Data Collection:</b><br/>Semi-structured Interviews, Focus Groups, Survey</p> | Not reported | <p><b>Sample Size:</b> 57<br/><b>Participant Characteristics:</b><br/>Average Age (SD): Latino/a: 22 (no S.D.), Non-Latino/a: 25 (no S.D.)<br/>Gender:<br/>Male, Latino: 59.26%; Non-Latino: 60.00%<br/>Female, Latina: 40.74%, Non-Latino: 40.00%</p> <p>Race/ Ethnicity:<br/>Latino/a, 47.37%<br/>Non-Latino, 52.63%</p> <p>Cancer Type(s): Leukemia (Acute Lymphocytic Leukemia, Acute Myeloid Leukemia), Wilms tumor, Non-Hodgkin Lymphoma, Hodgkin Lymphoma, Other (Primitive neuroectodermal tumor, rhabdomyosarcoma, embryonal carcinoma)<br/>Survivorship Timing (Range): 60+<br/>Stratified by Latino/a Subgroups: N</p> | Psychological, Social, Spiritual, Physical | Childhood cancer survivors experience good HRQOL in adulthood, with no statistically significant difference between Latinos and Non-Latino Whites in the physical, psychological, social and spiritual domains. Three distinct subthemes arose for Latinos in the social health domain: closer family relationships, medically vulnerable adults (treatment by family members as being Physically vulnerable), altruism (compassion towards others). Same themes were identified among non-Latinos but an additional theme of impaired sibling relationships" was identified in non-Latinos not present among Latinos. |
| Casillas, J., 2010[46]<br>(10/10)          | <p><b>Study design:</b><br/>Qualitative</p> <p><b>Data Collection:</b><br/>Semi-structured Interviews</p>                         | Not reported | <p><b>Sample Size:</b> 27<br/><b>Participant Characteristics:</b><br/>Average Age (SD): 20<br/>Gender:<br/>Male, 44%<br/>Female, 56%</p> <p>Race/ Ethnicity:<br/>Latino/a, 100%<br/>Non-Hispanic White, 0%<br/>Non-Hispanic Black, 0%<br/>Asian, 0%</p> <p>Cancer Type(s): Leukemia, brain/ central nervous system, lymphomas, soft-tissue sarcoma, other<br/>Survivorship Timing (Not Specified): Not Specified<br/>Stratified by Latino/a Subgroups: Y</p>                                                                                                                                                                      | Psychological, Social                      | Family participation in the care of AYA (including presence at survivorship visits, assisting with appointment scheduling and providing emotional support) played an important role in their survivorship care as they transitioned to adults. Cancer stigma (e.g., peers viewing cancer as fatal) and parental trauma around discussions related to cancer made Latino AYA cancer survivors avoid survivorship discussions (outside of discussion about follow up clinic visits).                                                                                                                                     |
| Castellino, S. M., 2005[47]<br>(22/22)     | <p><b>Study design:</b><br/>Quantitative Cross-Sectional</p> <p><b>Data Collection:</b><br/>Survey</p>                            | Not reported | <p><b>Sample Size:</b> 8,767<br/><b>Participant Characteristics:</b><br/>Average Age (SD): 26.9, (no SD)<br/>Gender (Not Specified for the Total):<br/>Male, Black: 50.3%; Hispanic: 50.1%; Non-Hispanic White: 53.3%<br/>Female, Black: 49.7%; Hispanic: 49.9%; Non-Hispanic White: 46.7%</p> <p>Race/ Ethnicity:<br/>Latino/a, 5.74%<br/>Non-Hispanic White, 89.21%<br/>Non-Hispanic Black, 5.05%<br/>Asian, 0%</p>                                                                                                                                                                                                             | Psychological, Overall, Physical           | In a cohort of childhood cancer survivors, Hispanic men were more likely to report adverse general health, functional impairment, and any adverse health status in models that did not adjust for SES. The rate of adverse mental health was similar in Hispanics compared to Whites.                                                                                                                                                                                                                                                                                                                                  |

|                                          |                                                                                              |               |                                                                                                                                                                                                                                                                                                                                                                                                                                                                                                                          |                                            |                                                                                                                                                                                                                                                                                                                                                                                                                                                                                                                                                                                      |
|------------------------------------------|----------------------------------------------------------------------------------------------|---------------|--------------------------------------------------------------------------------------------------------------------------------------------------------------------------------------------------------------------------------------------------------------------------------------------------------------------------------------------------------------------------------------------------------------------------------------------------------------------------------------------------------------------------|--------------------------------------------|--------------------------------------------------------------------------------------------------------------------------------------------------------------------------------------------------------------------------------------------------------------------------------------------------------------------------------------------------------------------------------------------------------------------------------------------------------------------------------------------------------------------------------------------------------------------------------------|
|                                          |                                                                                              |               | Cancer Type(s): "Childhood": Leukemia, CNS, Hodgkin's, NHL, Wilms, Neuroblastoma, Sarcoma, Bone<br>Survivorship Timing (Mean for Latino/as (Not Specified for Total)): 206.4<br>Stratified by Latino/a Subgroups: N                                                                                                                                                                                                                                                                                                      |                                            |                                                                                                                                                                                                                                                                                                                                                                                                                                                                                                                                                                                      |
| Castillo, A. 2019 [48]<br><br>(9/10)     | <b>Study Design:</b><br>Qualitative<br><br><b>Data Collection:</b><br>Focus groups           | N/A           | <b>Sample Size:</b> 23<br><b>Participant Characteristics:</b><br>Age Mean: 52.5<br>Gender:<br>Male, 0.0%<br>Female, 100%<br>Race/ Ethnicity:<br>Latino/a, 100.0%<br>Non-Hispanic White, 0.0%<br>Non-Hispanic Black, 0.0%<br>Cancer Type(s): Breast<br>Survivorship Timing <=24 months<br>Stratified by Latino/a Subgroups: No                                                                                                                                                                                            | Psychological, Social, Spiritual           | In a cohort of Latina breast cancer survivors, Latinas discussed expressing anger and fear as to how breast cancer affected their family. In order to cope with breast cancer and its treatment, Latina women commonly cited that they suppressed negative emotions, relied on their family as a source of support and on religiosity.                                                                                                                                                                                                                                               |
| Ceballos, R. M., 2015[49]<br><br>(22/22) | <b>Study design:</b><br>Mixed-Methods<br><br><b>Data Collection:</b><br>Focus Groups, Survey | Not reported  | <b>Sample Size:</b> 29<br><b>Participant Characteristics:</b><br>Average Age (SD): 54.31, (10.72)<br>Gender:<br>Male, 41.38%<br>Female, 58.62%<br>Race/ Ethnicity:<br>Latino/a, 100%<br>Non-Hispanic White, 0%<br>Non-Hispanic Black, 0%<br>Asian, 0%<br>Cancer Type(s): Breast, colorectal, endometrial/ cervical, leukemia, lung, multiple myeloma, non-Hodgkin's lymphoma, osteosarcoma, ovarian/ uterine, prostate, stomach, testicular<br>Survivorship Timing (Range): ≤ 120<br>Stratified by Latino/a Subgroups: N | Psychological, Spiritual, Social, Physical | Emerging theme for both male and female Hispanic survivors included, fear of recurrence, difficulty with memory and fatigue. Survivors also reported concerns about the impact of cancer on family, depression and isolation, using Spirituality as coping mechanism.<br><br>In the feasibility study, implementation of the support group led to improvements in quality of life [functional (p= 0.05), Social (p=0.02), and meaning/purpose (p=0.05)] among women but not men.                                                                                                     |
| Chebli, P. 2019 [50]<br><br>(9/10)       | <b>Study Design:</b><br>Qualitative<br><br><b>Data Collection:</b><br>Focus Groups           | Not Specified | <b>Sample Size: 19 (cancer survivors)</b><br><b>Participant Characteristics:</b><br>Age Range: ≥18<br>Gender:<br>Male, 0%<br>Female, 100 %<br>Race/ Ethnicity:<br>Latino/a, 100%<br>Non-Hispanic White 0%<br>Non-Hispanic Black 0%<br>Cancer Type(s): Breast<br>Survivorship Timing: ≥132 months<br>Stratified by Latino/a Subgroups: N                                                                                                                                                                                  | Social                                     | Determinants of financial toxicity among Latina breast cancer survivors include: lack of knowledge about treatment-related costs, delayed financial planning and insurance coverage. Cultural norms (to seeking financial assistance), language barriers and barriers associated with non-citizenship status all contributed to financial toxicity. Financial assistance programs were helpful but usually had restrictive eligibility criteria. Access to individuals with relevant cancer experiences within patients' network was a protective determinant of financial toxicity. |

|                                              |                                                                                                                        |                     |                                                                                                                                                                                                                                                                                                                                                                                                                                                                                                                                                    |                                        |                                                                                                                                                                                                                                                                                                                                                                                                                                                                                                                                                                                                                                                      |
|----------------------------------------------|------------------------------------------------------------------------------------------------------------------------|---------------------|----------------------------------------------------------------------------------------------------------------------------------------------------------------------------------------------------------------------------------------------------------------------------------------------------------------------------------------------------------------------------------------------------------------------------------------------------------------------------------------------------------------------------------------------------|----------------------------------------|------------------------------------------------------------------------------------------------------------------------------------------------------------------------------------------------------------------------------------------------------------------------------------------------------------------------------------------------------------------------------------------------------------------------------------------------------------------------------------------------------------------------------------------------------------------------------------------------------------------------------------------------------|
| <p>Christie, K. M., 2010[51]<br/>(21/22)</p> | <p><b>Study design:</b><br/>Quantitative Longitudinal</p> <p><b>Data Collection:</b><br/>Survey</p>                    | <p>Not reported</p> | <p><b>Sample Size:</b> 677<br/><b>Participant Characteristics:</b><br/>Average Age (SD): 50.88, (9.46)<br/>Gender:<br/>Male, 0%<br/>Female, 100%<br/>Race/ Ethnicity:<br/>Latino/a, 62.78%<br/>Non-Hispanic White, 37.22%<br/>Non-Hispanic Black, 0%<br/>Asian, 0%<br/>Cancer Type(s): Breast<br/>Survivorship Timing (Longitudinal assessment timing): 6, 18<br/>Stratified by Latino/a Subgroups: N</p>                                                                                                                                          | <p>Social, Psychological, Physical</p> | <p>Hispanic women reported greater sexual dysfunction compared to non-Hispanic White women, including significantly less interest in sex, greater difficulty enjoying sex, greater difficulty becoming sexually aroused, and greater difficulty becoming lubricated compared to non-Hispanic White women. There was a modest but significant association between acculturation and sexual dysfunction, such that women who used English more than Spanish were more likely to report better sexual function. Comparisons of depression and body image concerns between Hispanic and non-Hispanic white women were not statistically significant.</p> |
| <p>Clarke, T. C., 2015[52]<br/>(20/22)</p>   | <p><b>Study design:</b><br/>Quantitative Cross-Sectional</p> <p><b>Data Collection:</b><br/>Survey</p>                 | <p>Not reported</p> | <p><b>Sample Size:</b> 24,810 survivors (and 382,837 persons without cancer; 407,647 total)<br/><b>Participant Characteristics (of 24,810 survivors):</b><br/>Average Age (SD): Not Specified<br/>Gender:<br/>Male, 35.94%<br/>Female, 64.06%<br/>Race/ Ethnicity:<br/>Latino/a, 7.90%<br/>Non-Hispanic White, 79.91%<br/>Non-Hispanic Black, 9.79%<br/>Asian, 2.40%<br/>Cancer Type(s): Bladder, breast, colorectal, lung, prostate, and other<br/>Survivorship Timing (Not Specified): Not Specified<br/>Stratified by Latino/a Subgroups: N</p> | <p>Social, Psychological, Physical</p> | <p>Hispanic cancer survivors were somewhat more likely to be employed following a cancer diagnosis compared to White cancer survivors (OR=1.2; 95% CI: 1.11-1.25). Hispanic and Black cancer survivors were less likely to report good-to-excellent health compared to Whites.</p>                                                                                                                                                                                                                                                                                                                                                                   |
| <p>Clauser, S. B., 2008[53]<br/>(19/22)</p>  | <p><b>Study design:</b><br/>Quantitative Cross-Sectional</p> <p><b>Data Collection:</b><br/>Survey, Administrative</p> | <p>Not reported</p> | <p><b>Sample Size:</b> 21,504 participants with cancer diagnosis<br/><b>Participant Characteristics (for Cancer Diagnosis participants):</b><br/>Age Range: 65+<br/>Gender:<br/>Male, 50.56%<br/>Female, 49.44%<br/>Race/ Ethnicity:<br/>Latino/a, 5.48%<br/>Non-Hispanic White, 81.79%<br/>Non-Hispanic Black, 5.76%<br/>Asian, 4.62%<br/>Other, 2.35%<br/>Cancer Type(s): Breast, prostate, colorectal, lung<br/>Survivorship Timing (Not Specified): Not Specified<br/>Stratified by Latino/a Subgroups: N</p>                                  | <p>Physical, Psychological</p>         | <p>In adjusted analyses, Hispanic Medicare beneficiaries reported lower physical and mental HRQOL compared to White beneficiaries.</p>                                                                                                                                                                                                                                                                                                                                                                                                                                                                                                               |

|                                                  |                                                                                                        |                              |                                                                                                                                                                                                                                                                                                                                                                                                                                                                                                         |                                        |                                                                                                                                                                                                                                                                                                                                                                                                                                                                                     |
|--------------------------------------------------|--------------------------------------------------------------------------------------------------------|------------------------------|---------------------------------------------------------------------------------------------------------------------------------------------------------------------------------------------------------------------------------------------------------------------------------------------------------------------------------------------------------------------------------------------------------------------------------------------------------------------------------------------------------|----------------------------------------|-------------------------------------------------------------------------------------------------------------------------------------------------------------------------------------------------------------------------------------------------------------------------------------------------------------------------------------------------------------------------------------------------------------------------------------------------------------------------------------|
| <p>Connor, A. E., 2016[54]</p> <p>(22/22)</p>    | <p><b>Study design:</b><br/>Quantitative Longitudinal</p> <p><b>Data Collection:</b><br/>Survey</p>    | <p>Not reported</p>          | <p><b>Sample Size:</b> 451<br/><b>Participant Characteristics:</b><br/>Average Age (SD): Survivors: 64.3, (9.1); Controls: 64.0, (10.0)<br/>Gender:<br/>Male, 0<br/>Female, 100%<br/>Race/ Ethnicity:<br/>Latino/a, Survivors: 34.50; Controls: 31.47%<br/>Non-Hispanic White, Survivors: 65.50%;<br/>Controls: 68.53%<br/>Non-Hispanic Black, 0%<br/>Asian, 0%<br/>Cancer Type(s): Breast<br/>Survivorship Timing (Longitudinal baseline median): 193 days<br/>Stratified by Latino/a Subgroups: N</p> | <p>Physical, Psychological</p>         | <p>Compared to Non-Hispanic Whites, Hispanic survivors were more likely to report lower mental and physical health. High BMI was associated with decreased mental health, but was not significantly different between Hispanics and non-Hispanic whites.</p>                                                                                                                                                                                                                        |
| <p>Costas-Muñiz, R., 2017[55]</p> <p>(22/22)</p> | <p><b>Study design:</b><br/>Quantitative Cross-Sectional</p> <p><b>Data Collection:</b><br/>Survey</p> | <p>Not reported</p>          | <p><b>Sample Size:</b> 265<br/><b>Participant Characteristics:</b><br/>Average Age (SD): 61.16, (11.20)<br/>Gender:<br/>Male, 0%<br/>Female, 100%<br/>Race/ Ethnicity:<br/>Latino/a, 36.60%<br/>Non-Hispanic White, 63.40%<br/>Non-Hispanic Black, 0%<br/>Asian, 0%<br/>Cancer Type(s): Breast<br/>Survivorship Timing (Not Specified): Not Specified<br/>Stratified by Latino/a Subgroups: Y</p>                                                                                                       | <p>Psychological, Social</p>           | <p>About 49% of Latinas and 40% of White breast cancer survivors indicated that they needed psychosocial services after their diagnosis and were not significantly different. However, Latinas were significantly more likely to receive spiritual counseling compared to Whites (11% versus 3%).</p>                                                                                                                                                                               |
| <p>Crane, T. E. 2019 [56]</p>                    | <p><b>Study Design:</b><br/>Quantitative Longitudinal</p> <p><b>Data Collection:</b><br/>Survey</p>    | <p>N/A</p>                   | <p><b>Sample Size:</b> 293<br/><b>Participant Characteristics:</b><br/>Age Mean: 48.96<br/>Gender:<br/>Male, 0.0%<br/>Female, 100.0%<br/>Race/ Ethnicity:<br/>Latino/a, 100.0%<br/>Non-Hispanic White, 0.0%<br/>Non-Hispanic Black, 0.0%<br/>Cancer Type(s): Breast<br/>Survivorship Timing: Not specified<br/>Stratified by Latino/a Subgroups: No</p>                                                                                                                                                 | <p>Physical, Psychological, Social</p> | <p>In this study examining the unique trajectories of depression and anxiety among subgroups of Latinas breast cancer survivors, three patterns emerged for both outcomes. Depression patterns included: low/moderate-stable (78%), high-improving (7%), and high-stable (15%). The patterns for anxiety included: low-stable (73%), high-improving (18%), and high-worsening (9%). Chemotherapy use, age, and social support were important predictors of subgroup membership.</p> |
| <p>Crookes, D. M., 2016[57]</p> <p>(22/22)</p>   | <p><b>Study design:</b><br/>Quantitative Cross-Sectional</p> <p><b>Data Collection:</b><br/>Survey</p> | <p>Social Network Theory</p> | <p><b>Sample Size:</b> 34<br/><b>Participant Characteristics:</b><br/>Average Age (SD): 56.9, (9.5)<br/>Gender:<br/>Male, 0%<br/>Female, 100%<br/>Race/ Ethnicity:<br/>Latino/a, 100%<br/>Latina Black, 29.4%<br/>Latina White, 22.1%<br/>Latina Native American, 2.9%</p>                                                                                                                                                                                                                              | <p>Social</p>                          | <p>Survivors (predominantly Dominican) reported an average of 12.6 members in their social networks, mostly constituting family members (children and other relatives). Other social network members included friends and neighbors and religious group networks. Women with high network diversity had higher acculturation scores.</p>                                                                                                                                            |



|                                         |                                                                                                                   |                                             |                                                                                                                                                                                                                                                                                                                                                                                                                                           |                                  |                                                                                                                                                                                                                                                                                                                                                                                                                                                 |
|-----------------------------------------|-------------------------------------------------------------------------------------------------------------------|---------------------------------------------|-------------------------------------------------------------------------------------------------------------------------------------------------------------------------------------------------------------------------------------------------------------------------------------------------------------------------------------------------------------------------------------------------------------------------------------------|----------------------------------|-------------------------------------------------------------------------------------------------------------------------------------------------------------------------------------------------------------------------------------------------------------------------------------------------------------------------------------------------------------------------------------------------------------------------------------------------|
|                                         |                                                                                                                   |                                             | Latina Mixed Race, 5.9%<br>Cancer Type(s): Breast<br>Survivorship Timing at Longitudinal Baseline (Mean): 38.4<br>Stratified by Latino/a Subgroups: Y                                                                                                                                                                                                                                                                                     |                                  |                                                                                                                                                                                                                                                                                                                                                                                                                                                 |
| Das, N., 2015[58]<br><br>(21/22)        | <b>Study design:</b><br>Quantitative Longitudinal<br><br><b>Data Collection:</b><br>Survey                        | Not reported                                | <b>Sample Size:</b> 199<br><b>Participant Characteristics:</b><br>Average Age (SD): Not Specified<br>Gender:<br>Male, 0%<br>Female, 100%<br>Race/ Ethnicity:<br>Latino/a, 34.88%<br>Non-Hispanic White, 65.12%<br>Non-Hispanic Black, 0%<br>Asian, 0%<br>Cancer Type(s): Breast<br>Survivorship Timing (Not Specified): Not Specified<br>Stratified by Latino/a Subgroups: N                                                              | Physical                         | There were no statistically significant differences between Hispanic and Non-Hispanic White women with breast cancer diagnosis reporting lymphedema. However, the authors note that they may not have had adequate power to detect a statistical difference.                                                                                                                                                                                    |
| Dirksen, S. R., 2002[59]<br><br>(22/22) | <b>Study design:</b><br>Quantitative Cross-Sectional<br><br><b>Data Collection:</b><br>Survey                     | Well-Being Among Survivors of Breast Cancer | <b>Sample Size:</b> 100<br><b>Participant Characteristics:</b><br>Average Age (SD): 55.0, (11.5) (Hispanic), 57.7 (Non-Hispanic White), (10.7)<br>Gender:<br>Male, 0%<br>Female, 100%<br>Race/ Ethnicity:<br>Latino/a, 50%<br>Non-Hispanic White, 50%<br>Non-Hispanic Black, 0%<br>Asian, 0%<br>Cancer Type(s): Breast<br>Survivorship Timing (Median): 47.0 (Hispanic), 42.0 (Non-Hispanic White)<br>Stratified by Latino/a Subgroups: N | Psychological, Social            | Social support, uncertainty, and resourcefulness predicted self-esteem for Hispanic and non-Hispanic White women. In addition, self-esteem and healthcare orientation were significant predictors of well-being for both groups. This study did not find any statistically significant differences between Hispanic and non-Hispanic White women for these outcomes.                                                                            |
| Dyer, K. E., 2015[60]<br><br>(9/10)     | <b>Study design:</b><br>Qualitative<br><br><b>Data Collection:</b><br>Unstructured and Semi-Structured Interviews | Not reported                                | <b>Sample Size:</b> 23<br><b>Participant Characteristics:</b><br>Average Age (SD): 43.43, (no S.D.)<br>Gender:<br>Male, 13%<br>Female, 87%<br>Race/ Ethnicity:<br>Latino/a, 100%<br>Non-Hispanic White, 0%<br>Non-Hispanic Black, 0%<br>Asian, 0%<br>Cancer Type(s): Breast, lymphoma, uterine, thyroid, colorectal, angiosarcoma, melanoma, oral<br>Survivorship Timing (Mean): 115.2<br>Stratified by Latino/a Subgroups: N             | Psychological, Social, Spiritual | Participants overwhelmingly spoke positively of the impact of cancer on their lives, with most participants crediting their diagnosis with changing the outlook on life, teaching them to appreciate life more. Participants also reported that cancer strengthened and clarified their relationships (friend and families) and deepened their relationship with God. A desire to help others was also a prominent theme among these survivors. |

|                                            |                                                                                                        |                                          |                                                                                                                                                                                                                                                                                                                                                                                                                                                                |                                |                                                                                                                                                                                                                                                                                                                                                                                                                                                                                      |
|--------------------------------------------|--------------------------------------------------------------------------------------------------------|------------------------------------------|----------------------------------------------------------------------------------------------------------------------------------------------------------------------------------------------------------------------------------------------------------------------------------------------------------------------------------------------------------------------------------------------------------------------------------------------------------------|--------------------------------|--------------------------------------------------------------------------------------------------------------------------------------------------------------------------------------------------------------------------------------------------------------------------------------------------------------------------------------------------------------------------------------------------------------------------------------------------------------------------------------|
| <p>Elimimian, E. 2020 [61]<br/>(20/22)</p> | <p><b>Study Design:</b><br/>Quantitative</p> <p><b>Data Collection:</b><br/>Survey</p>                 | <p>Not Specified</p>                     | <p><b>Sample Size:</b> 33 (who completed 24-month follow-up)</p> <p><b>Participant Characteristics:</b><br/> <b>Age Range:</b> Mean: 54.6<br/> <b>Gender:</b><br/> Male, 0%<br/> Female, 100%<br/> <b>Race/ Ethnicity:</b><br/> Latino/a, 97%<br/> Non-Hispanic White, %<br/> Non-Hispanic Black, %<br/> Asian, %<br/> <b>Cancer Type(s):</b> Breast<br/> <b>Survivorship Timing:</b> ≥60 months<br/> <b>Stratified by Latino/a Subgroups:</b> N</p>           | <p>Physical, Psychological</p> | <p>An 8-week mindfulness-based stress reduction program led to reduction in anxiety (mean score change: -2.39, p=0.04) and depression (mean score change: -2.27, p=0.04) at 24-month follow-up (compared to baseline) among Hispanic breast cancer survivors. The intervention also led to statistically significant increases in mental health component scores (mean score change: 4.07, p=0.03) but not the physical component scores.</p>                                        |
| <p>Escalera, C. 2019 [62]<br/>(20/22)</p>  | <p><b>Study Design:</b><br/>Quantitative</p> <p><b>Data Collection:</b><br/>Survey</p>                 | <p>Cohen's Model of Stress Buffering</p> | <p><b>Sample Size:</b> 151</p> <p><b>Participant Characteristics:</b><br/> <b>Age Range:</b> 28-81<br/> <b>Gender:</b><br/> Male, 0%<br/> Female, 100%<br/> <b>Race/ Ethnicity:</b><br/> Latino/a, 100%<br/> Non-Hispanic White, 0%<br/> Non-Hispanic Black, 0%<br/> Asian, 0%<br/> <b>Cancer Type(s):</b> Breast<br/> <b>Survivorship Timing:</b> ≥12 months<br/> <b>Stratified by Latino/a Subgroups:</b> N</p>                                              | <p>Psychological, Social</p>   | <p>Intrusive thoughts were positively associated with depressive symptoms regardless of level of social support, but social support did not act as a buffer (moderator). Intrusive thoughts were also associated with anxiety; and both tangible and affectionate support moderated the relationship between intrusive thoughts and anxiety i.e., intrusive thoughts were more strongly associated with patients who reported lower levels of tangible and affectionate support.</p> |
| <p>Eversley, R., 2005[63]<br/>(20/22)</p>  | <p><b>Study design:</b><br/>Quantitative Cross-Sectional</p> <p><b>Data Collection:</b><br/>Survey</p> | <p>Not reported</p>                      | <p><b>Sample Size:</b> 116</p> <p><b>Participant Characteristics:</b><br/> <b>Average Age (SD):</b> 47, (no S.D.)<br/> <b>Gender:</b><br/> Male, 0%<br/> Female, 100%<br/> <b>Race/ Ethnicity:</b><br/> Latino/a, 25%<br/> Non-Hispanic White, 30%<br/> Non-Hispanic Black, 30%<br/> Other (Including Asian), 15%<br/> <b>Cancer Type(s):</b> Breast<br/> <b>Survivorship Timing (Range):</b> Less than 24<br/> <b>Stratified by Latino/a Subgroups:</b> N</p> | <p>Psychological, Physical</p> | <p>Latina breast cancer survivors reported significantly higher rates of fatigue and depression compared to Black and White patients. Compared to Whites, Latinas and Blacks were more likely to report pain and lymphedema.</p>                                                                                                                                                                                                                                                     |

|                                              |                                                                                                           |                     |                                                                                                                                                                                                                                                                                                                                                                                                                                                  |                                                   |                                                                                                                                                                                                                                                                                                                                                                                                                                                                                                                                                                                                                                                                                        |
|----------------------------------------------|-----------------------------------------------------------------------------------------------------------|---------------------|--------------------------------------------------------------------------------------------------------------------------------------------------------------------------------------------------------------------------------------------------------------------------------------------------------------------------------------------------------------------------------------------------------------------------------------------------|---------------------------------------------------|----------------------------------------------------------------------------------------------------------------------------------------------------------------------------------------------------------------------------------------------------------------------------------------------------------------------------------------------------------------------------------------------------------------------------------------------------------------------------------------------------------------------------------------------------------------------------------------------------------------------------------------------------------------------------------------|
| <p>Fatone, A. M., 2007[64]</p> <p>(8/10)</p> | <p><b>Study design:</b><br/>Qualitative</p> <p><b>Data Collection:</b><br/>Semi-structured Interviews</p> | <p>Not reported</p> | <p><b>Sample Size:</b> 20</p> <p><b>Participant Characteristics:</b><br/>Average Age (SD): 54.10, (10.54)</p> <p>Gender:<br/>Male, 0%<br/>Female, 100%</p> <p>Race/ Ethnicity:<br/>Latino/a, 60%<br/>Non-Hispanic White, 0%<br/>Non-Hispanic Black, 40%<br/>Asian, 0%</p> <p>Cancer Type(s): Breast<br/>Survivorship Timing (Not Specified): Not Specified<br/>Stratified by Latino/a Subgroups: N</p>                                           | <p>Physical, Psychological, Social, Spiritual</p> | <p>Psychological concerns were experienced among all Hispanic women, with main themes within this domain including sadness, crying, and anxiety. This was followed by the Physical domain (92% of women), with major symptoms including pain, fatigue, hair loss and nausea. Social/functional issues also identified as important (92%) with a central theme of financial distress; other themes included family and changes in Socializing and inability to work. Hispanics also reported sexual issues (75%) with women experiencing body image issues and decreased sexual activity. Spirituality (faith as source of strength) was a high priority for 50% of Hispanic women.</p> |
| <p>Foley, K. L., 2006[65]</p> <p>(9/10)</p>  | <p><b>Study design:</b><br/>Qualitative</p> <p><b>Data Collection:</b><br/>Semi-structured Interviews</p> | <p>Not reported</p> | <p><b>Sample Size:</b> 58</p> <p><b>Participant Characteristics:</b><br/>Age Range: 25-86</p> <p>Gender:<br/>Male, 44.8%<br/>Female, 55.2%</p> <p>Race/ Ethnicity:<br/>Latino/a, 13.9%<br/>Non-Hispanic White, 70.7%<br/>Non-Hispanic Black, 15.5%<br/>Asian, 0%</p> <p>Cancer Type(s): Bladder, breast, colorectal, gynecological, head and neck, and prostate<br/>Survivorship Timing (Mean): 92.4<br/>Stratified by Latino/a Subgroups: N</p> | <p>Spiritual, Psychological</p>                   | <p>The themes identified in this multiethnic sample of long-term cancer survivors, including, That's Life (no change in QOL), Personal Growth (positive growth experience), Relinquishing Control (learning to let go) and Resentment (depression or anger) were not different by race/ethnicity.</p>                                                                                                                                                                                                                                                                                                                                                                                  |
| <p>Fu O. S., 2009[66]</p> <p>(22/22)</p>     | <p><b>Study design:</b><br/>Quantitative Cross-Sectional</p> <p><b>Data Collection:</b><br/>Survey</p>    | <p>Not reported</p> | <p><b>Sample Size:</b> 139</p> <p><b>Participant Characteristics:</b><br/>Average Age (SD): 52.5 (Median)</p> <p>Gender:<br/>Male, 0%<br/>Female, 100%</p> <p>Race/ Ethnicity:<br/>Latino/a, 45%<br/>Non-Hispanic White, 42%<br/>Non-Hispanic Black, 13%<br/>Asian, 0%</p> <p>Cancer Type(s): Breast<br/>Survivorship Timing (Range): ≥ 3<br/>Stratified by Latino/a Subgroups: N</p>                                                            | <p>Physical, Psychological</p>                    | <p>Hispanic breast cancer survivors were more likely than Black or White women to report &gt;10 symptoms as a result of their cancer. Specifically, Hispanic women were more likely to experience pain-related and chemotherapy-related symptoms relative to Whites.</p>                                                                                                                                                                                                                                                                                                                                                                                                               |
| <p>Galvan, N., 2009[67]</p> <p>(10/10)</p>   | <p><b>Study design:</b><br/>Qualitative</p> <p><b>Data Collection:</b><br/>Focus Groups, Interviews</p>   | <p>Not reported</p> | <p><b>Sample Size:</b> 22</p> <p><b>Participant Characteristics:</b><br/>Average Age (SD): 51, (9)</p> <p>Gender:<br/>Male, 0%<br/>Female, 100%</p> <p>Race/ Ethnicity:<br/>Latino/a, 100%<br/>Non-Hispanic White, 0%</p>                                                                                                                                                                                                                        | <p>Psychological, Social, Spiritual</p>           | <p>Latina immigrant BC survivors who perceived to receive social support reported less psychological distress, consistent with literature on non-Latina women. Family emerged as a valuable source of support. Additionally, Latina women reported lacking information regarding their treatment as a result of not questioning their doctor and survivors unsure about their treatment</p>                                                                                                                                                                                                                                                                                            |

|                                                      |                                                                                                        |                                      |                                                                                                                                                                                                                                                                                                                                                                                                                                                                                                                                                                                                                                                                                                            |                                                     |                                                                                                                                                                                                                                                                                                                                                                                                                                                                             |
|------------------------------------------------------|--------------------------------------------------------------------------------------------------------|--------------------------------------|------------------------------------------------------------------------------------------------------------------------------------------------------------------------------------------------------------------------------------------------------------------------------------------------------------------------------------------------------------------------------------------------------------------------------------------------------------------------------------------------------------------------------------------------------------------------------------------------------------------------------------------------------------------------------------------------------------|-----------------------------------------------------|-----------------------------------------------------------------------------------------------------------------------------------------------------------------------------------------------------------------------------------------------------------------------------------------------------------------------------------------------------------------------------------------------------------------------------------------------------------------------------|
|                                                      |                                                                                                        |                                      | <p>Non-Hispanic Black, 0%<br/>Asian, 0%<br/>Cancer Type(s): Breast<br/>Survivorship Timing (Not Specified): Not Specified<br/>Stratified by Latino/a Subgroups: N</p>                                                                                                                                                                                                                                                                                                                                                                                                                                                                                                                                      |                                                     | <p>choices. Latina BC survivors not questioning treatment may be due to the cultural value of respect.</p>                                                                                                                                                                                                                                                                                                                                                                  |
| <p>Garcia-Jimenez M., 2014[68]<br/><br/>(22/22)</p>  | <p><b>Study design:</b><br/>Quantitative Cross-Sectional</p> <p><b>Data Collection:</b><br/>Survey</p> | <p>Psychosocial Models of Coping</p> | <p><b>Sample Size:</b> 330<br/><b>Participant Characteristics:</b><br/>Average Age (SD): 58.25, (11.89)<br/>Gender:<br/>Male, 0%<br/>Female, 100%<br/>Race/ Ethnicity:<br/>Latino/a, 100%<br/>Non-Hispanic White, 0%<br/>Non-Hispanic Black, 0%<br/>Asian, 0%<br/>Cancer Type(s): Breast<br/>Survivorship Timing (Not Specified): Not Specified<br/>Stratified by Latino/a Subgroups: N</p>                                                                                                                                                                                                                                                                                                                | <p>Psychological, Social<br/>Spiritual, Overall</p> | <p>Acculturation was associated with self-rated health, where English proficient Latina breast cancer survivors were more likely than their low English proficient counterparts to report better self-rated health. Having a sense of inner peace/ meaning in life and cancer self-efficacy (e.g., positive attitude, seeking social support) were both associated with self-rated health, and attenuated the relationship between acculturation and self-rated health.</p> |
| <p>Giedzinska, A. S. , 2004[69]<br/><br/>(21/22)</p> | <p><b>Study design:</b><br/>Quantitative Cross-Sectional</p> <p><b>Data Collection:</b><br/>Survey</p> | <p>Not reported</p>                  | <p><b>Sample Size:</b> 621<br/><b>Participant Characteristics:</b><br/>Average Age (SD): 55.23, (11.46)<br/>Gender:<br/>Male, 0%<br/>Female, 100%<br/>Race/ Ethnicity:<br/>Latino/a, 12.56%<br/>Non-Hispanic White, 37.52%<br/>Non-Hispanic Black, 37.52%<br/>Asian, 12.40%<br/>Cancer Type(s): Breast<br/>Survivorship Timing (Mean): 35.16<br/>Stratified by Latino/a Subgroups: N</p>                                                                                                                                                                                                                                                                                                                   | <p>Psychological, Social,<br/>Physical</p>          | <p>Latinas reported worse mental health and emotional well-being compared to African Americans and more physical symptoms compared to Whites, African Americans, and Asian Americans. Exploratory analyses revealed age correlated significantly with mental and physical QOL measures.</p>                                                                                                                                                                                 |
| <p>Goldfarb, M., 2016[70]<br/><br/>(20/22)</p>       | <p><b>Study design:</b><br/>Quantitative Cross-Sectional</p> <p><b>Data Collection:</b><br/>Survey</p> | <p>Not reported</p>                  | <p><b>Sample Size:</b> 1028<br/><b>Participant Characteristics:</b><br/>Average Age (SD): Not Specified<br/>Gender:<br/>Male, YA: 6.5%; &gt;40: 10.9%<br/>Female, TA: 93.5%; &gt;40: 89.1%<br/>Race/ Ethnicity:<br/>Hispanic, YA: 8.3%; &gt;40: 4.9%<br/>Non-Hispanic, YA: 91.7%; &gt;40: 95.1%<br/>White, YA: 86.6%; &gt;40: 94.8%<br/>Black, YA: 1.1%; &gt;40: 1.1%<br/>Asian, YA: 5.1%; &gt;40: 1.5%<br/>American Island or Pacific Islander, YA: 1.4%; &gt;40: 0.9%<br/>Other, YA: 5.8%; &gt;40: 1.7%<br/>Cancer Type(s): Thyroid (papillary/ follicular and medullary)<br/>Survivorship Timing (Mean): 46.3 for current YAs and 58.38 for older age group<br/>Stratified by Latino/a Subgroups: N</p> | <p>Physical, Psychological</p>                      | <p>There were no significant differences between Hispanic thyroid cancer survivors and non-Hispanic survivors on measures of physical well-being and psychological well-being.</p>                                                                                                                                                                                                                                                                                          |

|                                                 |                                                                                                        |                                                    |                                                                                                                                                                                                                                                                                                                                                                                                             |                                                            |                                                                                                                                                                                                                                                                                                                                                                                                                                                                                                                                                                                                               |
|-------------------------------------------------|--------------------------------------------------------------------------------------------------------|----------------------------------------------------|-------------------------------------------------------------------------------------------------------------------------------------------------------------------------------------------------------------------------------------------------------------------------------------------------------------------------------------------------------------------------------------------------------------|------------------------------------------------------------|---------------------------------------------------------------------------------------------------------------------------------------------------------------------------------------------------------------------------------------------------------------------------------------------------------------------------------------------------------------------------------------------------------------------------------------------------------------------------------------------------------------------------------------------------------------------------------------------------------------|
| <p>Gonzales, F. A., 2016[71]</p> <p>(22/22)</p> | <p><b>Study design:</b><br/>Quantitative Longitudinal</p> <p><b>Data Collection:</b><br/>Survey</p>    | <p>Response Shift Framework</p>                    | <p><b>Sample Size:</b> 150<br/><b>Participant Characteristics:</b><br/>Average Age (SD): 50.13, (10.91)<br/>Gender:<br/>Male, 0%<br/>Female, 100%<br/>Race/ Ethnicity:<br/>Latino/a, 100%<br/>Non-Hispanic White, 0%<br/>Non-Hispanic Black, 0%<br/>Asian, 0%<br/>Cancer Type(s): Breast<br/>Survivorship Timing at Longitudinal Baseline (Range): Less than 12<br/>Stratified by Latino/a Subgroups: Y</p> | <p>Psychological, Social, Spiritual</p>                    | <p>Among this group of Latina immigrants with breast cancer, emotional support was positively associated with emotional well-being. Emotional support was also positively associated with acceptance but negatively associated with fatalism. The relationship between emotional support and well-being was mediated by both fatalism and acceptance (only marginally significant).</p>                                                                                                                                                                                                                       |
| <p>Gonzales, P., 2016[72]</p> <p>(10/10)</p>    | <p><b>Study design:</b><br/>Qualitative</p> <p><b>Data Collection:</b><br/>Focus Groups</p>            | <p>Not reported</p>                                | <p><b>Sample Size:</b> 41<br/><b>Participant Characteristics:</b><br/>Average Age (SD): 53.39, (9.23)<br/>Gender:<br/>Male, 0%<br/>Female, 100%<br/>Race/ Ethnicity:<br/>Chinese, 50.00%<br/>Korean, 26.19%<br/>Mexican-American, 21.43%<br/>Cancer Type(s): Breast<br/>Survivorship Timing (Mean): 30<br/>Stratified by Latino/a Subgroups: N</p>                                                          | <p>Psychological, Spiritual</p>                            | <p>Mexican and Korean Americans emphasized the importance of religion/spiritual coping in dealing with breast cancer, while Chinese Americans emphasized benefit finding (beneficial meaning from cancer diagnosis). Related to benefit finding, the most referenced sub-theme among Mexican Americans was prioritization (changes in life priorities as a result of cancer). Mexican Americans also expressed religious oriented fatalistic coping (leaving breast cancer prognosis up to God). There was also greater use of "fighting spirit" among Mexican and Chinese American (compared to Korean).</p> |
| <p>Graves, K. D., 2012[73]</p> <p>(21/22)</p>   | <p><b>Study design:</b><br/>Quantitative Cross-Sectional</p> <p><b>Data Collection:</b><br/>Survey</p> | <p>Contextual Model of HRQOL; Ecological Model</p> | <p><b>Sample Size:</b> 264<br/><b>Participant Characteristics:</b><br/>Average Age (SD): 50.6, (9.9)<br/>Gender:<br/>Male, 0%<br/>Female, 100%<br/>Race/ Ethnicity:<br/>Latino/a, 100%<br/>Non-Hispanic White, 0%<br/>Non-Hispanic Black, 0%<br/>Asian, 0%<br/>Cancer Type(s): Breast<br/>Survivorship Timing (Mean): 32.4<br/>Stratified by Latino/a Subgroups: N</p>                                      | <p>Physical, Psychological, Social, Spiritual, Overall</p> | <p>In a cohort of Latina breast cancer survivors, shame and stigma related to breast cancer were negatively associated with overall and domain-specific QOL. Acculturation was not independently related to QOL outcomes. Social factors were associated with overall QOL and Social and functional well-being, and medical contextual factors (e.g., medical mistrust) were independently related to overall QOL as well as Physical and emotional well-being.</p>                                                                                                                                           |
| <p>Haddy, T. B., 2009[74]</p> <p>(16/22)</p>    | <p><b>Study design:</b><br/>Quantitative Cross-Sectional</p> <p><b>Data Collection:</b><br/>Survey</p> | <p>Not reported</p>                                | <p><b>Sample Size:</b> 324<br/><b>Participant Characteristics:</b><br/>Average Age (SD): Not Specified<br/>Gender:<br/>Male, 51.9%<br/>Female, 48.1%<br/>Race/ Ethnicity:<br/>Latino/a, 6.2%<br/>Non-Hispanic White, 70.4%<br/>Non-Hispanic Black, 14.8%<br/>Asian, 0%<br/>Other, 3.7%</p>                                                                                                                  | <p>Physical, Psychological</p>                             | <p>Hispanic childhood cancer survivors had greater prevalence of acute myeloid leukemia relapses, and cardiac problems compared with Whites.</p>                                                                                                                                                                                                                                                                                                                                                                                                                                                              |

|                                        |                                                                                               |              |                                                                                                                                                                                                                                                                                                                                                                                                                                                                                                      |                                 |                                                                                                                                                                                                                                                                                                                                                                                                                                                                         |
|----------------------------------------|-----------------------------------------------------------------------------------------------|--------------|------------------------------------------------------------------------------------------------------------------------------------------------------------------------------------------------------------------------------------------------------------------------------------------------------------------------------------------------------------------------------------------------------------------------------------------------------------------------------------------------------|---------------------------------|-------------------------------------------------------------------------------------------------------------------------------------------------------------------------------------------------------------------------------------------------------------------------------------------------------------------------------------------------------------------------------------------------------------------------------------------------------------------------|
|                                        |                                                                                               |              | Cancer Type(s): Leukemia (including: ALL, acute myeloid leukemia, and MDS)<br>Survivorship Timing (Not Specified): Not Specified<br>Stratified by Latino/a Subgroups: N                                                                                                                                                                                                                                                                                                                              |                                 |                                                                                                                                                                                                                                                                                                                                                                                                                                                                         |
| Holden, A. E., 2014[75]<br><br>(21/22) | <b>Study design:</b><br>Quantitative Cross-Sectional<br><br><b>Data Collection:</b><br>Survey | Not reported | <b>Sample Size:</b> 117<br><b>Participant Characteristics:</b><br>Average Age (SD): 56.1, (no S.D.)<br>Gender:<br>Male, 0%<br>Female, 100%<br>Race/ Ethnicity:<br>Latino/a, 100%<br>Non-Hispanic White, 0%<br>Non-Hispanic Black, 0%<br>Asian, 0%<br>Cancer Type(s): Breast<br>Survivorship Timing (Mean): No Ovarian cancer screening: 56.4, Yes Ovarian cancer screening: 63.6, No Colorectal cancer screening: 60.0, Yes Colorectal cancer screening: 49.2<br>Stratified by Latino/a Subgroups: Y | Psychological                   | 31.6% of sample reported high levels of depressive symptoms. Women with high depressive symptoms had 0.44 and 0.35 times the odds of getting ovarian or any cancer screening respectively compared to women with low depressive symptoms.                                                                                                                                                                                                                               |
| Hughes, D. C., 2008[76]<br><br>(21/22) | <b>Study design:</b><br>Quantitative Longitudinal<br><br><b>Data Collection:</b><br>Survey    | Not reported | <b>Sample Size:</b> 25<br><b>Participant Characteristics:</b><br>Average Age (SD): 50.0, (8.44)<br>Gender:<br>Male, 0%<br>Female, 100%<br>Race/ Ethnicity:<br>Latino/a, 100%<br>Non-Hispanic White, 0%<br>Non-Hispanic Black, 0%<br>Asian, 0%<br>Cancer Type(s): Breast<br>Survivorship Timing (Mean): 61.3<br>Stratified by Latino/a Subgroups: N                                                                                                                                                   | Psychological, Social, Physical | Participation in this physical activity intervention among Hispanic breast cancer survivors resulted in improved self-reported stress levels (p-value=0.02). There was a trend towards improvement in mental and physical health function but these results were not statistically significant.                                                                                                                                                                         |
| Jagsi, R., 2014[77]<br><br>(21/22)     | <b>Study design:</b><br>Quantitative Longitudinal<br><br><b>Data Collection:</b><br>Survey    | Not reported | <b>Sample Size:</b> 1502<br><b>Participant Characteristics:</b><br>Average Age (SD):<br>Gender:<br>Male, 0%<br>Female, 100%<br>Race/ Ethnicity:<br>English-speaking Latina, 19.5%<br>Spanish-speaking Latina, 20.4%<br>Non-Hispanic White, 42.7%<br>Non-Hispanic Black, 17.4%<br>Asian, 0%<br>Cancer Type(s): Breast<br>Survivorship Timing (Not Specified): Not Specified<br>Stratified by Latino/a Subgroups: N                                                                                    | Social                          | Among all breast cancer survivors, 9% of whites, 15% of blacks, 17% of English-speaking Latinas, and 10% of Spanish-speaking Latinas reported medical debt (P =.03). Compared to Whites, Spanish-speaking Latinas had increased odds of financial decline (OR: 2.76; P = 0.006). Hispanics and Blacks had greater odds of experiencing privation (economically motivated treatment non-adherence and broader hardships related to medical expenses) compared to Whites. |

|                                              |                                                                                                        |                                          |                                                                                                                                                                                                                                                                                                                                                                                                                                |                                        |                                                                                                                                                                                                                                                                                                                                                                                                                         |
|----------------------------------------------|--------------------------------------------------------------------------------------------------------|------------------------------------------|--------------------------------------------------------------------------------------------------------------------------------------------------------------------------------------------------------------------------------------------------------------------------------------------------------------------------------------------------------------------------------------------------------------------------------|----------------------------------------|-------------------------------------------------------------------------------------------------------------------------------------------------------------------------------------------------------------------------------------------------------------------------------------------------------------------------------------------------------------------------------------------------------------------------|
| <p>Janz, N. K. , 2011[78]</p> <p>(22/22)</p> | <p><b>Study design:</b><br/>Quantitative Cross-Sectional</p> <p><b>Data Collection:</b><br/>Survey</p> | <p>Modified<br/>Stress<br/>Appraisal</p> | <p><b>Sample Size:</b> 1837<br/><b>Participant Characteristics:</b><br/>Average Age (SD): 56.8 (11.4)<br/>Gender:<br/>Male, 0%<br/>Female, 100%<br/>Race/ Ethnicity:<br/>Latino/a, 17%<br/>Non-Hispanic White, 68.7%<br/>Non-Hispanic Black, 14.3%<br/>Asian, 0%<br/>Cancer Type(s): Breast<br/>Survivorship Timing (Mean): 9.2<br/>Stratified by Latino/a Subgroups: N</p>                                                    | <p>Psychological</p>                   | <p>In unadjusted analyses, Latina women reported higher levels of worry compared to African American or White women. In unadjusted and adjusted analyses, Latinas with lower-levels of acculturation reported the highest level of worry compared to Latinas with high levels of acculturation, African American, and White women.</p>                                                                                  |
| <p>Janz, N. K., 2016[79]</p> <p>(21/22)</p>  | <p><b>Study design:</b><br/>Quantitative Cross-Sectional</p> <p><b>Data Collection:</b><br/>Survey</p> | <p>Modified<br/>Stress<br/>Appraisal</p> | <p><b>Sample Size:</b> 1536<br/><b>Participant Characteristics (of survivors):</b><br/>Average Age (SD): Not Specified<br/>Gender:<br/>Male, 0%<br/>Female, 100%<br/>Race/ Ethnicity:<br/>Latino/a, 26.1%<br/>Non-Hispanic White, 59.8%<br/>Non-Hispanic Black, 12.9%<br/>Asian, 0%<br/>Cancer Type(s): Breast<br/>Survivorship Timing (Approximately, the target was 4 years): 48<br/>Stratified by Latino/a Subgroups: N</p> | <p>Psychological, Social</p>           | <p>In unadjusted analyses, Latino/as with low acculturation were most likely to report worry compared with Latinas with high acculturation, Whites, or Blacks. Moreover, Latino/a partners with low acculturation reported the highest percentage of worry across all racial/ethnic groups. In adjusted analyses, Latinos with low acculturation were significantly more likely to report worry compared to Whites.</p> |
| <p>Janz, N. K., 2009[80]</p> <p>(22/22)</p>  | <p><b>Study design:</b><br/>Quantitative Cross-Sectional</p> <p><b>Data Collection:</b><br/>Survey</p> | <p>Not reported</p>                      | <p><b>Sample Size:</b> 1492<br/><b>Participant Characteristics:</b><br/>Average Age (SD): 57.5, (11.3)<br/>Gender:<br/>Male, 0%<br/>Female, 100%<br/>Race/ Ethnicity:<br/>Latino/a, 23.06%<br/>Non-Hispanic White, 48.66%<br/>Non-Hispanic Black, 25.87%<br/>Asian, 0%<br/>Cancer Type(s): Breast<br/>Survivorship Timing (Mean): 9.2<br/>Stratified by Latino/a Subgroups: N</p>                                              | <p>Physical, Psychological, Social</p> | <p>Hispanic breast cancer survivors reported more breast concerns compared to non-Hispanic Whites, and Hispanic women had significantly lower physical well-being, functional well-being, emotional well-being, social well-being compared to Non-Hispanic White women.</p>                                                                                                                                             |
| <p>Janz, N. K., 2008[81]</p> <p>(22/22)</p>  | <p><b>Study design:</b><br/>Quantitative Cross-Sectional</p> <p><b>Data Collection:</b><br/>Survey</p> | <p>Not reported</p>                      | <p><b>Sample Size:</b> 1137<br/><b>Participant Characteristics:</b><br/>Average Age (SD): 56.9, (no S.D.)<br/>Gender:<br/>Male, 0%<br/>Female, 100%<br/>Race/ Ethnicity:<br/>Latino/a, 50.22%<br/>Non-Hispanic White, 30.34%<br/>Non-Hispanic Black, 27.09%<br/>Asian, 0%<br/>Cancer Type(s): Breast</p>                                                                                                                       | <p>Physical, Psychological, Social</p> | <p>Latinas with low acculturation have the most unmet need for information support, possibly because of access, or awareness of the availability of information. There is a need for better explanation and more Spanish-speaking health professionals to help them understand their BC diagnosis and resources.</p>                                                                                                    |

|                                       |                                                                                               |                                        |                                                                                                                                                                                                                                                                                                                                                                                            |                                                     |                                                                                                                                                                                                                                                                                                                                                                                                                                                                                                                                                         |
|---------------------------------------|-----------------------------------------------------------------------------------------------|----------------------------------------|--------------------------------------------------------------------------------------------------------------------------------------------------------------------------------------------------------------------------------------------------------------------------------------------------------------------------------------------------------------------------------------------|-----------------------------------------------------|---------------------------------------------------------------------------------------------------------------------------------------------------------------------------------------------------------------------------------------------------------------------------------------------------------------------------------------------------------------------------------------------------------------------------------------------------------------------------------------------------------------------------------------------------------|
|                                       |                                                                                               |                                        | Survivorship Timing (Mean): 9.2<br>Stratified by Latino/a Subgroups: N                                                                                                                                                                                                                                                                                                                     |                                                     |                                                                                                                                                                                                                                                                                                                                                                                                                                                                                                                                                         |
| Jones, B. L., 2010[82]<br><br>(10/10) | <b>Study design:</b><br>Qualitative<br><br><b>Data Collection:</b><br>Interviews              | Not reported                           | <b>Sample Size:</b> 9<br><b>Participant Characteristics:</b><br>Age Range: 14-21<br>Gender:<br>Male, 22.22%<br>Female, 77.78%<br>Race/ Ethnicity:<br>Latino/a, 100%<br>Non-Hispanic White, 0%<br>Non-Hispanic Black, 0%<br>Asian, 0%<br>Cancer Type(s): Childhood, not specified<br>Survivorship Timing (Not Specified): Not Specified<br>Stratified by Latino/a Subgroups: N              | Social, Spiritual                                   | The study identified 7 themes among Latino AYAs. They 1) expressed a sense of gratitude for others, 2) shared that humor and a positive attitude were important for recovery, 3) felt respect and sympathy for younger patients, 4) indicated that faith and God played an important role in coping with cancer, 5) expressed in shift in attitude or actions for the better as a result of their cancer, 6) relied on family support, and 7) credited medical staff for creating a positive and nurturing environment.                                 |
| Juarez, G., 2013[83]<br><br>(21/22)   | <b>Study design:</b><br>Quantitative Longitudinal<br><br><b>Data Collection:</b><br>Survey    | Quality of Life in Cancer Survivorship | <b>Sample Size:</b> 52<br><b>Participant Characteristics:</b><br>Average Age (SD): 25.5, (10.9)<br>Gender:<br>Male, 0%<br>Female, 100%<br>Race/ Ethnicity:<br>Latino/a, 100%<br>Non-Hispanic White, 0%<br>Non-Hispanic Black, 0%<br>Asian, 0%<br>Cancer Type(s): Breast<br>Survivorship Timing <b>After Intervention</b> (Longitudinal Baseline): 3<br>Stratified by Latino/a Subgroups: N | Physical, Psychological, Social, Spiritual, Overall | Latina BCS reported many QOL concerns: 96% of sample reported problems with fatigue. Primary domains of concern were psychological (severe distress related to treatment, including changes in appearance, fear of recurrence or new cancer spreading) and social (family distress - particularly daughters and other close female relatives getting cancer). Reported levels of spirituality and religion were also high.<br><br>The intervention (tailored, bilingual education) led to small improvement in overall HRQOL, uncertainty and distress. |
| Kent, E. E., 2013[84]<br><br>(21/22)  | <b>Study design:</b><br>Quantitative Cross-Sectional<br><br><b>Data Collection:</b><br>Survey | Not reported                           | <b>Sample Size:</b> 604<br><b>Participant Characteristics:</b><br>Age Range: 40-64<br>Gender:<br>Male, 0%<br>Female, 100%<br>Race/ Ethnicity:<br>Latino/a, 9.6%<br>Non-Hispanic White, 56.8%<br>Non-Hispanic Black, 29.8%<br>Asian, 0%<br>Other, 3.8%<br>Cancer Type(s): Breast<br>Longitudinal baseline (range after diagnosis): 2-12<br>Stratified by Latino/a Subgroups: N              | Psychological, Social                               | Compared to Whites, Hispanic breast cancer survivors were less likely to participate in support programs and confide in physicians (p<0.01). Among Hispanics, there was a trend towards an inverse relationship between support program participation and post-traumatic growth (although this was not statistically significant).                                                                                                                                                                                                                      |
| Kent, E. E., 2014[85]<br><br>(21/22)  | <b>Study design:</b><br>Quantitative Cross-Sectional<br><br><b>Data Collection:</b>           | Not reported                           | <b>Sample Size:</b> 606<br><b>Participant Characteristics:</b><br>Average Age (SD): Not Specified<br>Gender:                                                                                                                                                                                                                                                                               | Physical, Psychological                             | Hispanic survivors were the most likely to report symptom bother.                                                                                                                                                                                                                                                                                                                                                                                                                                                                                       |



|                                       |                                                                                                        |              |                                                                                                                                                                                                                                                                                                                                                                                                                                                                   |                                 |                                                                                                                                                                                                                                                                                                                                              |
|---------------------------------------|--------------------------------------------------------------------------------------------------------|--------------|-------------------------------------------------------------------------------------------------------------------------------------------------------------------------------------------------------------------------------------------------------------------------------------------------------------------------------------------------------------------------------------------------------------------------------------------------------------------|---------------------------------|----------------------------------------------------------------------------------------------------------------------------------------------------------------------------------------------------------------------------------------------------------------------------------------------------------------------------------------------|
|                                       | Survey                                                                                                 |              | <p>Male, 56.3%<br/>Female, 43.7%</p> <p>Race/ Ethnicity:<br/>Latino/a, 8.3%<br/>Non-Hispanic White, 74.1%<br/>Non-Hispanic Asian, 10.7%<br/>Other, 6.9%</p> <p>Cancer Type(s): Leukemia, bladder, colorectal<br/>Survivorship Timing (Not Specified): Not Specified<br/>Stratified by Latino/a Subgroups: N</p>                                                                                                                                                   |                                 |                                                                                                                                                                                                                                                                                                                                              |
| Knobf, M. T., 2012[86]<br><br>(21/22) | <p><b>Study design:</b><br/>Quantitative Cross-Sectional</p> <p><b>Data Collection:</b><br/>Survey</p> | Not reported | <p><b>Sample Size:</b> 1,516<br/><b>Participant Characteristics:</b><br/>Average Age (SD): 61, (no S.D.)<br/>Gender:<br/>Male, 23.6%<br/>Female, 76.4%</p> <p>Race/ Ethnicity:<br/>Latino/a, 4.3%<br/>Non-Hispanic White, 87.7%<br/>Non-Hispanic Black, 5.3%<br/>Asian, 0%<br/>Other, 2.7%</p> <p>Cancer Type(s): Breast, prostate, colorectal, lung, melanoma<br/>Survivorship Timing (Not Specified): Not Specified<br/>Stratified by Latino/a Subgroups: N</p> | Physical, Psychological, Social | Hispanic cancer survivors reported the highest level of need across the individual domains of SCNF-SF34 (supportive care needs), including in psychological, health system and information, physical and daily living, patient care and support and sexuality.                                                                               |
| Koch, L., 2013[87]<br><br>(N/A)       | <p><b>Study design:</b><br/>Review</p> <p><b>Data Collection:</b><br/>N/A</p>                          | Not reported | <p><b>Sample Size:</b> 17 articles<br/><b>Cancer Type(s):</b> Multiple</p>                                                                                                                                                                                                                                                                                                                                                                                        | Psychological                   | This systematic review noted Hispanics were reported to have higher levels of fear of recurrence than other ethnicities.                                                                                                                                                                                                                     |
| Lee, E., 2016[88]<br><br>(22/22)      | <p><b>Study design:</b><br/>Quantitative Longitudinal</p> <p><b>Data Collection:</b><br/>Survey</p>    | Not reported | <p><b>Sample Size:</b> 375<br/><b>Participant Characteristics:</b><br/>Average Age (SD): 56.0, (9.0)<br/>Gender:<br/>Male, 0%<br/>Female, 100%</p> <p>Race/ Ethnicity:<br/>Latino/a, 64%<br/>Non-Hispanic White, 15%<br/>Non-Hispanic Black, 21%<br/>Asian, 0%</p> <p>Cancer Type(s): Breast<br/>Survivorship Timing (Not Specified): Not Specified, but "newly diagnosed"<br/>Stratified by Latino/a Subgroups: N</p>                                            | Physical                        | In unadjusted and adjusted analysis, Hispanics Whites had significant higher pre- and post-treatment associated pain compared to Non-Hispanic Whites.                                                                                                                                                                                        |
| Krok-Schoen, J. L. 2019 [89]          | <p><b>Study Design:</b><br/>Qualitative</p> <p><b>Data Collection:</b><br/>Focus Groups</p>            | N/A          | <p><b>Sample Size:</b> 16<br/><b>Participant Characteristics:</b><br/>Age Mean (SD): 57.4 (10.2)<br/>Gender:<br/>Male, 0.0%<br/>Female, 100.0%</p> <p>Race/ Ethnicity:<br/>Latino/a, 100.0%</p>                                                                                                                                                                                                                                                                   | Physical, Psychological         | Hispanic breast cancer survivors in both English-speaking and Spanish-speaking focus groups reported high levels of fatigue and nausea associated with chemotherapy, and English-speaking Hispanic breast cancer survivors spoke to their clinicians about their depressive symptoms more often compared to those who were Spanish-speaking. |

|                                                    |                                                                                                             |                                     |                                                                                                                                                                                                                                                                                                                                                                                                                                                                                                     |                                                   |                                                                                                                                                                                                                                                                                                                     |
|----------------------------------------------------|-------------------------------------------------------------------------------------------------------------|-------------------------------------|-----------------------------------------------------------------------------------------------------------------------------------------------------------------------------------------------------------------------------------------------------------------------------------------------------------------------------------------------------------------------------------------------------------------------------------------------------------------------------------------------------|---------------------------------------------------|---------------------------------------------------------------------------------------------------------------------------------------------------------------------------------------------------------------------------------------------------------------------------------------------------------------------|
|                                                    |                                                                                                             |                                     | <p>Non-Hispanic White, 0.0%<br/> Non-Hispanic Black, 0.0%<br/> Cancer Type(s): Breast<br/> Survivorship Timing: &lt;=36 months<br/> Stratified by Latino/a Subgroups: No</p>                                                                                                                                                                                                                                                                                                                        |                                                   |                                                                                                                                                                                                                                                                                                                     |
| <p>Levine, E. G., 2007[90]<br/><br/> (9/10)</p>    | <p><b>Study design:</b><br/> Qualitative</p> <p><b>Data Collection:</b><br/> Semi-structured Interviews</p> | <p>Not reported</p>                 | <p><b>Sample Size:</b> 161<br/> <b>Participant Characteristics:</b><br/> Average Age (SD): 57, (no S.D.)<br/> Gender:<br/> Male, 0%<br/> Female, 100%<br/> Race/ Ethnicity:<br/> Latino/a, 13%<br/> Non-Hispanic White, 32%<br/> Non-Hispanic Black, 22%<br/> Asian, 32%<br/> Cancer Type(s):<br/> Survivorship Timing (Mean): 24<br/> Stratified by Latino/a Subgroups: N</p>                                                                                                                      | <p>Spiritual</p>                                  | <p>A higher proportion of Hispanics and African American felt comforted by God compared to Whites and Asian/Pacific Islander. However, of those who said they were spiritual, Hispanics had the lowest proportion.</p>                                                                                              |
| <p>Lim, J., 2009[91]<br/><br/> (21/22)</p>         | <p><b>Study design:</b><br/> Quantitative Cross-Sectional</p> <p><b>Data Collection:</b><br/> Survey</p>    | <p>Cultural Health Belief Model</p> | <p><b>Sample Size:</b> 389<br/> <b>Participant Characteristics:</b><br/> Average Age (SD): Latina: 53.45, (11.5)<br/> Gender:<br/> Male, 0%<br/> Female, 100%<br/> Race/ Ethnicity:<br/> Latino/a, 47.04%<br/> Non-Hispanic White, 0%<br/> Non-Hispanic Black, 0%<br/> Asian, 52.96%<br/> Cancer Type(s): Breast<br/> Survivorship Timing (Mean): Latina: 35.16;<br/> Stratified by Latino/a Subgroups: N</p>                                                                                       | <p>Psychological, Social, Physical, Spiritual</p> | <p>Asian-Americans showed higher emotional and physical well-being scores than LCS. Each group had different cultural beliefs about their treatments that shaped their key factors of care, with LCS putting more emphasis on God, Luck, and health providers and Asian-Americans taking more personal control.</p> |
| <p>Livaudais, J. C., 2010[92]<br/><br/> (9/10)</p> | <p><b>Study design:</b><br/> Qualitative</p> <p><b>Data Collection:</b><br/> Focus Groups</p>               | <p>Not reported</p>                 | <p><b>Sample Size:</b> 41<br/> <b>Participant Characteristics:</b><br/> Average Age (SD): Not Specified<br/> Gender:<br/> Male, 24.39%<br/> Female, 75.61%<br/> Race/ Ethnicity:<br/> Latino/a, 100%<br/> Non-Hispanic White, 0%<br/> Non-Hispanic Black, 0%<br/> Asian, 0%<br/> Cancer Type(s): Brain, breast, cervical, colorectal, liver, lung, lymphoma, pancreatic, prostate, and uterine<br/> Survivorship Timing (Not Specified): Not Specified<br/> Stratified by Latino/a Subgroups: N</p> | <p>Social, Spiritual, Psychological</p>           | <p>Women, especially Latina cancer survivors with breast or reproductive cancers, reported a lack of support from their spouse. Several women expressed the belief that their cancer was given to them through "God's Will" (fatalism).</p>                                                                         |

|                                         |                                                                                                   |                                          |                                                                                                                                                                                                                                                                                                                                                 |                                                    |                                                                                                                                                                                                                                                                                                                                                                                                                                                                                                                                                                                                                                                                                                                                   |
|-----------------------------------------|---------------------------------------------------------------------------------------------------|------------------------------------------|-------------------------------------------------------------------------------------------------------------------------------------------------------------------------------------------------------------------------------------------------------------------------------------------------------------------------------------------------|----------------------------------------------------|-----------------------------------------------------------------------------------------------------------------------------------------------------------------------------------------------------------------------------------------------------------------------------------------------------------------------------------------------------------------------------------------------------------------------------------------------------------------------------------------------------------------------------------------------------------------------------------------------------------------------------------------------------------------------------------------------------------------------------------|
| Lockhart, 2018 [93]                     | Scoping Review                                                                                    | N/A                                      | <u>Sample Size:</u> 18 articles<br><u>Cancer Type(s):</u> Multiple                                                                                                                                                                                                                                                                              |                                                    |                                                                                                                                                                                                                                                                                                                                                                                                                                                                                                                                                                                                                                                                                                                                   |
| Lopez-Class, M., 2012[94]<br><br>(N/A)  | <u>Study design:</u><br>Review<br><br><u>Data Collection:</u><br>N/A                              | Contextual and Ecological Model of HRQOL | <u>Sample Size:</u> 37 studies<br><u>Cancer Type(s):</u> Breast                                                                                                                                                                                                                                                                                 | Psychological, Social, Spiritual                   | In the physical domain, Latina cancer survivors reported arm and breast pain, fatigue, hair loss, nausea, with low acculturated Latinas reporting poorer physical function than other groups. Acculturation was correlated with several poor health outcomes. In several studies with multiethnic samples, Latinas reported poorer psychological and emotional well-being than other ethnic groups. Functional wellbeing largely was assessed through work capability with studies reporting financial distress among Latinas. High levels of religiosity/Spirituality linked to functional wellbeing. Social networks and support was important among Latinas, with immigrant survivors reporting a significant lack of support. |
| Lopez-Class, M., 2011[95]<br><br>(9/10) | <u>Study design:</u><br>Qualitative<br><br><u>Data Collection:</u><br>Interviews, Focus Groups    | Not reported                             | <u>Sample Size:</u> 28<br><u>Participant Characteristics:</u><br>Average Age (SD): 47, (9.0)<br>Gender:<br>Male, 0%<br>Female, 100%<br>Race/ Ethnicity:<br>Latino/a, 100%<br>Non-Hispanic White, 0%<br>Non-Hispanic Black, 0%<br>Asian, 0%<br>Cancer Type(s): Breast<br>Survivorship Timing (Mean): 37.2<br>Stratified by Latino/a Subgroups: Y | Psychological, Social, Spiritual                   | Among this group of Latina breast cancer survivors, HRQOL was determined by several factors including: reliance on spirituality or relationship with God, fatalism, secrecy/shame around breast cancer diagnosis, feelings of isolation (being lonely), importance of family support (familism), self-reliance (Physical and mental toughness), and, for some, partner's difficulty with showing emotional support (machismo).                                                                                                                                                                                                                                                                                                    |
| Luckett, T., 2011[96]<br><br>(N/A)      | <u>Study design:</u><br>Review<br><br><u>Data Collection:</u><br>N/A                              | Not reported                             | <u>Sample Size:</u> 21 articles<br><u>Cancer Type(s):</u> Multiple                                                                                                                                                                                                                                                                              | Psychological, Social, Spiritual, Physical Overall | In the US, compared to the majority group (Whites), Hispanics were more likely to report distress (p<0.0001), depression (p=0.041), Social HRQoL (p=0.035) and overall HRQOL (p=0.0008). Poorer outcomes consistent with potentially clinically important differences for the three measures.                                                                                                                                                                                                                                                                                                                                                                                                                                     |
| Maly, R. C., 2014[97]<br><br>(22/22)    | <u>Study design:</u><br>Quantitative Longitudinal<br><br><u>Data Collection:</u><br><u>Survey</u> | Not reported                             | <u>Sample Size:</u> 921<br><u>Participant Characteristics:</u><br>Average Age (SD): 50.8, (9.5)<br>Gender:<br>Male, 0%<br>Female, 100%<br>Race/ Ethnicity:<br>Latino/a, 53.5%<br>Non-Hispanic White, 31.7%<br>Non-Hispanic Black, 5.9%<br>Asian/ Pacific Islander, 7.4%                                                                         | Psychological, Social, Physical                    | Less acculturated Latinas had higher mental and physical well-being than White women.                                                                                                                                                                                                                                                                                                                                                                                                                                                                                                                                                                                                                                             |

|                                             |                                                                                                |              |                                                                                                                                                                                                                                                                                                                                                                                                             |                                            |                                                                                                                                                                                                                                                                                                                                                                   |
|---------------------------------------------|------------------------------------------------------------------------------------------------|--------------|-------------------------------------------------------------------------------------------------------------------------------------------------------------------------------------------------------------------------------------------------------------------------------------------------------------------------------------------------------------------------------------------------------------|--------------------------------------------|-------------------------------------------------------------------------------------------------------------------------------------------------------------------------------------------------------------------------------------------------------------------------------------------------------------------------------------------------------------------|
|                                             |                                                                                                |              | Other, 1.6%<br>Cancer Type(s): Breast<br>Survivorship Timing (Longitudinal assessment timing): 6, 18, 36, 60<br>Stratified by Latino/a Subgroups: N                                                                                                                                                                                                                                                         |                                            |                                                                                                                                                                                                                                                                                                                                                                   |
| Martinez Tyson, D., 2016[98]<br><br>(9/10)  | <b>Study design:</b><br>Qualitative<br><br><b>Data Collection:</b><br>Interviews, Focus Groups | Not reported | <b>Sample Size:</b> 33<br><b>Participant Characteristics:</b><br>Average Age (SD): 50<br>Gender:<br>Male, 0%<br>Female, 100%<br>Race/ Ethnicity:<br>Latino/a, 100%<br>Non-Hispanic White, 0%<br>Non-Hispanic Black, 0%<br>Asian, 0%<br>Cancer Type(s): Breast<br>Survivorship Timing (Not Specified): Not Specified<br>Stratified by Latino/a Subgroups: Y                                                  | Psychological, Social, Spiritual, Physical | Compared to their providers, Latina patients emphasized more interpersonal aspects of stressors, such as family, communication, and relationships and intrapersonal stressors such as fear, changes in physical appearance, and side effects of chemotherapy. QOL-related stress management techniques utilized by LCS undergoing therapy include spirituality.   |
| Martinez Tyson, D. 2018 [99]<br><br>(19/22) | <b>Study Design:</b><br>Quantitative Cross-sectional<br><br><b>Data Collection:</b><br>Survey  | Not reported | <b>Sample Size:</b><br><b>Participant Characteristics:</b><br>Age Mean 59.6<br>Gender:<br>Male, 100.0%<br>Female, 0.0%<br>Race/ Ethnicity:<br>Latino/a, 100.0%<br>Non-Hispanic White, 0.0%<br>Non-Hispanic Black, 0.0%<br>Cancer Type(s): Prostate, Lymphoid/hematopoietic, Colorectal, Digestive, Head and neck, Kidney, Other<br>Survivorship Timing: <=60 months<br>Stratified by Latino/a Subgroups: No | Physical, Psychological, Overall           | Approximately one quarter of Hispanic male cancer survivors demonstrated symptoms of probable or certain depression (20.2%) or anxiety (22.8%). Overall HRQOL for the sample was 60.9 (out of a possible 104), with the mean scores for the FACT-G subscales being 11.3 for family well-being, 12.7 for emotional well-being, and 15.2 for functional well-being. |
| McNulty, J., 2016[100]<br><br>(N/A)         | <b>Study design:</b><br>Review<br><br><b>Data Collection:</b><br>N/A                           | Not reported | <b>Sample Size:</b> 15 studies<br><b>Cancer Type(s):</b> Multiple                                                                                                                                                                                                                                                                                                                                           | Psychological, Social, Spiritual, Physical | Reviewed interventions to improve HRQOL among Hispanic cancer survivors focused on psychosocial support, education, exercise and patient navigation. Though at early stages, most of the interventions were feasible and effective in improving HRQOL among Latinos.                                                                                              |
| Medeiros, E. A., 2015[101]<br><br>(19/22)   | <b>Study design:</b><br>Quantitative Cross-Sectional<br><br><b>Data Collection:</b><br>Survey  | Not reported | <b>Sample Size:</b> 102<br><b>Participant Characteristics:</b><br>Average Age (SD): 58.8, (10.06)<br>Gender:<br>Male, 8.5%<br>Female, 91.5%<br>Race/ Ethnicity:<br>Latino/a, 48.3%<br>Non-Hispanic White, 51.7%<br>Non-Hispanic Black, 0%<br>Asian, 0%<br>Cancer Type(s): Breast (76.5%), Other (Not Specified)                                                                                             | Overall                                    | There were no statistically significant differences between Hispanic/Latinos and Non-Hispanics White in overall health-related quality of life. In unadjusted analyses, acculturation appeared to be associated with overall HRQOL, but was not significant in a fully adjusted model.                                                                            |

|                                         |                                                                                               |                           |                                                                                                                                                                                                                                                                                                                                                                                                              |                                    |                                                                                                                                                                                           |
|-----------------------------------------|-----------------------------------------------------------------------------------------------|---------------------------|--------------------------------------------------------------------------------------------------------------------------------------------------------------------------------------------------------------------------------------------------------------------------------------------------------------------------------------------------------------------------------------------------------------|------------------------------------|-------------------------------------------------------------------------------------------------------------------------------------------------------------------------------------------|
|                                         |                                                                                               |                           | Survivorship Timing (Not Specified): 48 survivors<br><60, 19 survivors 60-120, 8 survivors >120<br>Stratified by Latino/a Subgroups: N                                                                                                                                                                                                                                                                       |                                    |                                                                                                                                                                                           |
| Meneses, K. 2018 [102]                  | <b>Study Design:</b><br>Quantitative Longitudinal<br><br><b>Data Collection:</b><br>Survey    | Not reported              | <b>Sample Size:</b> 40<br><b>Participant Characteristics:</b><br>Age Range: 37-87<br>Gender:<br>Male, 0.0%<br>Female, 100.0%<br>Race/ Ethnicity:<br>Latino/a, 100.0%<br>Non-Hispanic White, 0.0%<br>Non-Hispanic Black, 0.0%<br>Cancer Type(s): Breast<br>Survivorship Timing: 26.76 months<br>Stratified by Latino/a Subgroups: No                                                                          | Social, Psychological,<br>Physical | In this intervention study testing the efficacy of a telephone-delivered LBCSCI support and education, Latinas reported improvement in pain and fatigue at 3- and 6-months post baseline. |
| Meeske, K. A., 2007[103]<br><br>(22/22) | <b>Study design:</b><br>Quantitative Cross-Sectional<br><br><b>Data Collection:</b>           | Not reported              | <b>Sample Size:</b> 86<br><b>Participant Characteristics:</b><br>Average Age (SD): 13.3, (2.9)<br>Gender:<br>Male, 59%<br>Female, 41%<br>Race/ Ethnicity:<br>Latino/a, 48%<br>Non-Hispanic White, 34%<br>Non-Hispanic Black, 0%<br>Asian, 0%<br>Other, 19%<br>Cancer Type(s): Leukemia, lymphoma, Wilms tumor, brain tumor, other<br>Survivorship Timing (Range): 60+<br>Stratified by Latino/a Subgroups: N | Physical, Psychological            | PedsQL scores (especially emotional functioning) were lower for Hispanic survivors and were the lowest for social functioning, although the social functioning was not significant.       |
| Miller, A. M., 2015[104]<br><br>(21/22) | <b>Study design:</b><br>Quantitative Cross-Sectional<br><br><b>Data Collection:</b><br>Survey | Contextual Model of HRQOL | <b>Sample Size:</b> 320<br><b>Participant Characteristics:</b><br>Average Age (SD): 54.3, (11.85)<br>Gender:<br>Male, 0%<br>Female, 100%<br>Race/ Ethnicity:<br>Latino/a, 72.5%<br>Non-Hispanic White, 0%<br>Non-Hispanic Black, 27.5%<br>Asian, 0%<br>Cancer Type(s): Breast<br>Survivorship Timing (Range): 12- 60<br>Stratified by Latino/a Subgroups: N                                                  | Overall                            | In a multi-ethnic cohort of women breast cancer survivors, Hispanic ethnicity was associated with worse overall HRQOL compared to African Americans.                                      |

|                                                  |                                                                                                        |                     |                                                                                                                                                                                                                                                                                                                                                                                                                                 |                                                 |                                                                                                                                                                                                                                                                                                                                                                                                                                                                 |
|--------------------------------------------------|--------------------------------------------------------------------------------------------------------|---------------------|---------------------------------------------------------------------------------------------------------------------------------------------------------------------------------------------------------------------------------------------------------------------------------------------------------------------------------------------------------------------------------------------------------------------------------|-------------------------------------------------|-----------------------------------------------------------------------------------------------------------------------------------------------------------------------------------------------------------------------------------------------------------------------------------------------------------------------------------------------------------------------------------------------------------------------------------------------------------------|
| <p>Molina, Y., 2013[105]<br/><br/>(N/A)</p>      | <p><b>Study design:</b><br/>Review</p> <p><b>Data Collection:</b><br/>N/A</p>                          | <p>Not reported</p> | <p><b>Sample Size:</b> 30 studies<br/><b>Cancer Type(s):</b> Breast</p>                                                                                                                                                                                                                                                                                                                                                         | <p>Physical, Psychological</p>                  | <p>Related to survivorship, the review identified only one study that tested a v-week Physical activity intervention (that also addressed cultural factors) to reduce stress and improve HRQOL. The intervention resulted in improved levels of distress and a trend towards improved HRQOL (although not statistically significant). Related to diagnosis/treatment, interventions (using yoga and mental health specialists) led to improvement in HRQOL.</p> |
| <p>Moreno, P. I. 2018 [106]</p>                  | <p><b>Study Design:</b><br/>Quantitative Cross-sectional</p> <p><b>Data Collection:</b><br/>Survey</p> | <p>Not reported</p> | <p><b>Sample Size:</b> 288<br/><b>Participant Characteristics:</b><br/>Age, Mean: 56.05<br/>Gender:<br/>Male, 46.2%<br/>Female, 53.8%<br/>Race/ Ethnicity:<br/>Latino/a, 100.0%<br/>Cancer Type(s): Breast, Prostate, Colorectal<br/>Survivorship Timing: 11.98 months<br/>Stratified by Latino/a Subgroups: No</p>                                                                                                             | <p>Physical, Psychological, Social</p>          | <p>Among a sample of Latino cancer survivors, satisfaction with cancer care and facets of self-efficacy were associated with greater HRQOL. Additionally, path model analyses found that patients' perceived confidence in managing patient-provider communication, psychological distress, social support, and social/recreational activities explained the relationship between satisfaction with cancer care and greater HRQOL.</p>                          |
| <p>Moreno, P. I. 2019 [107]</p>                  | <p><b>Study Design:</b><br/>Quantitative Cross-sectional</p> <p><b>Data Collection:</b><br/>Survey</p> | <p>Not reported</p> | <p><b>Sample Size:</b> 288<br/><b>Participant Characteristics:</b><br/>Age Mean (SD): 56.05 (10.2)<br/>Gender:<br/>Male, 46.2%<br/>Female, 53.8%<br/>Race/ Ethnicity:<br/>Latino/a, 100.0%<br/>Non-Hispanic White, 0.0%<br/>Non-Hispanic Black, 0.0%<br/>Cancer Type(s): Breast, prostate, colorectal<br/>Survivorship Timing: 11.98 months<br/>Stratified by Latino/a Subgroups: No</p>                                        | <p>Physical, Psychological, Social, Overall</p> | <p>Unmet supportive care needs were associated with lower patient-provider communication self-efficacy and satisfaction with cancer care as well as greater breast and prostate cancer-specific symptom burden.</p>                                                                                                                                                                                                                                             |
| <p>Morrow, P. K., 2014[108]<br/><br/>(22/22)</p> | <p><b>Study design:</b><br/>Quantitative Cross-Sectional</p> <p><b>Data Collection:</b><br/>Survey</p> | <p>Not reported</p> | <p><b>Sample Size:</b> 1090<br/><b>Participant Characteristics:</b><br/>Average Age (SD): 47.6, (6.8)<br/>Gender:<br/>Male, 0%<br/>Female, 100%<br/>Race/ Ethnicity:<br/>White, 77.6%<br/>Black, 8.6%<br/>Asian/ Pacific Islander, 3.4%<br/>Native American, 0.1%<br/>Other, 0.3%<br/>Cancer Type(s): Breast<br/>Survivorship Timing (Mean): Non-Responders: 87.6; Responders: 91.2<br/>Stratified by Latino/a Subgroups: N</p> | <p>Physical, Psychological, Social, Overall</p> | <p>Compared to White women, Hispanic women had worse family distress scores and lower overall QOL scores.</p>                                                                                                                                                                                                                                                                                                                                                   |

|                                                   |                                                                                                                     |                     |                                                                                                                                                                                                                                                                                                                                                                                                                                                  |                                                   |                                                                                                                                                                                                                                                                                                                                                                                                                                                                                                                                                                                                                                                                                                  |
|---------------------------------------------------|---------------------------------------------------------------------------------------------------------------------|---------------------|--------------------------------------------------------------------------------------------------------------------------------------------------------------------------------------------------------------------------------------------------------------------------------------------------------------------------------------------------------------------------------------------------------------------------------------------------|---------------------------------------------------|--------------------------------------------------------------------------------------------------------------------------------------------------------------------------------------------------------------------------------------------------------------------------------------------------------------------------------------------------------------------------------------------------------------------------------------------------------------------------------------------------------------------------------------------------------------------------------------------------------------------------------------------------------------------------------------------------|
| <p>Mujahid, M. S., 2010[109]<br/>(21/22)</p>      | <p><b>Study design:</b><br/>Quantitative Cross-Sectional</p> <p><b>Data Collection:</b><br/>Survey</p>              | <p>Not reported</p> | <p><b>Sample Size:</b> 589<br/><b>Participant Characteristics:</b><br/>Average Age (SD): 50.5, (8.2)<br/>Gender:<br/>Male, 0%<br/>Female, 100%<br/>Race/ Ethnicity:<br/>Latino/a, 22%<br/>Non-Hispanic White, 64%<br/>Non-Hispanic Black, 14%<br/>Asian, 0%<br/>Cancer Type(s): Breast<br/>Survivorship Timing (Mean): 589<br/>Stratified by Latino/a Subgroups: N</p>                                                                           | <p>Social</p>                                     | <p>Latinas were least likely to be working at time of diagnosis (65.6% were working, compared to 75.7% of Whites and 77.2% of African Americans) (pg. 215). Latinas were more likely than Whites to stop working as opposed to missing a month or less of work (OR: 3.0 [95% CI: 1.2-7.4]). Latinas with low acculturation were more likely to miss greater than one month or stop working compared with high acculturation Latinas, African American and Whites. Compared with Latinas with high acculturation, low acculturation Latinas were much more likely to be working in unsupportive work environments.</p>                                                                            |
| <p>Mujahid, M. S., 2011[110]<br/>(21/22)</p>      | <p><b>Study design:</b><br/>Quantitative Cross-Sectional</p> <p><b>Data Collection:</b><br/>Survey</p>              | <p>Not reported</p> | <p><b>Sample Size:</b> 1111<br/><b>Participant Characteristics:</b><br/>Average Age (SD): 50.8, (7.8)<br/>Gender:<br/>Male, 0%<br/>Female, 100%<br/>Race/ Ethnicity:<br/>Latino/a, 16.5%<br/>Non-Hispanic White, 68.0%<br/>Non-Hispanic Black, 15.5%<br/>Asian, 0%<br/>Cancer Type(s): Breast<br/>Survivorship Timing (Mean): 1090<br/>Stratified by Latino/a Subgroups: N</p>                                                                   | <p>Social</p>                                     | <p>Latina breast cancer survivors experienced the highest prevalence of job loss after breast cancer diagnosis (24.1% Latina, 10.1% African American, 6.9% White, p&lt;0.001). After accounting for sociodemographic factors, the odds of job loss was higher for Latina cancer survivors compared to Whites (OR: 2.2, 95% CI: 1.2-4.1). There was an interaction between race/ethnicity and treatment: among women who received chemotherapy, the odds of job loss was much higher among Latinas compared to Whites (OR: 3.8; 95% CI: 1.7-8.2); while there was no statistically significant differences in job loss among Latinas and Whites among women who did not receive chemotherapy.</p> |
| <p>Munoz, A. R., 2016[111]<br/>(19/22; 10/10)</p> | <p><b>Study design:</b><br/>Mixed-Methods</p> <p><b>Data Collection:</b><br/>Survey, Semi-Structured Interviews</p> | <p>Not reported</p> | <p><b>Sample Size:</b> 31<br/><b>Participant Characteristics:</b><br/>Average Age (SD): 33.2, (5.1)<br/>Gender:<br/>Male, 35%<br/>Female, 65%<br/>Race/ Ethnicity:<br/>Hispanic Ethnicity, 42%<br/>Black, 29%<br/>Asian/ Pacific Islander, 26%<br/>Mixed, 10%<br/>Other, 16%<br/>Cancer Type(s): Lymphoma, leukemia, thyroid, breast, cervical/ uterine, other<br/>Survivorship Timing (Range): 0-60<br/>Stratified by Latino/a Subgroups: N</p> | <p>Spiritual, Physical, Social, Psychological</p> | <p>Treatment side-effects such as neuropathy, hair loss, fertility issues, were more prevalent among Hispanic cancer survivors. Hispanics reported the lowest mean HRQOL scores compared to Blacks AND Asian/Pacific Islanders. Hispanics also reported worse emotional HRQOL scores than Asian/Pacific Islanders (p=0.05). There were no differences by race in physical, social or spiritual HRQOL domain scores.</p>                                                                                                                                                                                                                                                                          |

|                                                      |                                                                                                        |                                           |                                                                                                                                                                                                                                                                                                                                                                                                                                                                      |                                                            |                                                                                                                                                                                                                                                                                                                                                                                                                                                                                         |
|------------------------------------------------------|--------------------------------------------------------------------------------------------------------|-------------------------------------------|----------------------------------------------------------------------------------------------------------------------------------------------------------------------------------------------------------------------------------------------------------------------------------------------------------------------------------------------------------------------------------------------------------------------------------------------------------------------|------------------------------------------------------------|-----------------------------------------------------------------------------------------------------------------------------------------------------------------------------------------------------------------------------------------------------------------------------------------------------------------------------------------------------------------------------------------------------------------------------------------------------------------------------------------|
| <p>Munoz, A. R., 2015[112]<br/>(19/22)</p>           | <p><b>Study design:</b><br/>Quantitative Cross-Sectional</p> <p><b>Data Collection:</b></p>            | <p>Not reported</p>                       | <p><b>Sample Size:</b> 8864<br/><b>Participant Characteristics:</b><br/>Average Age (SD): 67.2, (11.88)<br/>Gender:<br/>Male, 44.6%<br/>Female, 55.4%<br/>Race/ Ethnicity:<br/>Latino/a, 7.6%<br/>Non-Hispanic White, 77.5%<br/>Non-Hispanic Black, 10.3%<br/>Asian, 0%<br/>Other, 4.6%<br/>Cancer Type(s): Breast, prostate, colorectal, bladder, uterine, skin melanoma, other<br/>Survivorship Timing (Range): 24-120<br/>Stratified by Latino/a Subgroups: N</p> | <p>Spiritual</p>                                           | <p>Hispanic cancer survivors had lower scores on Faith, Meaning, Peace and total FACIT-Sp than Blacks. Hispanics had the second highest scores on the Faith and total FACIT-Sp. Black and Hispanics reported the highest levels of Spiritual wellbeing.</p>                                                                                                                                                                                                                             |
| <p>Napoles, A. M., 2011[113]<br/>(21/22)</p>         | <p><b>Study design:</b><br/>Quantitative Cross-Sectional</p> <p><b>Data Collection:</b><br/>Survey</p> | <p>Social-Cognitive Transition Theory</p> | <p><b>Sample Size:</b> 330<br/><b>Participant Characteristics:</b><br/>Average Age (SD): 58.3, (11.9)<br/>Gender:<br/>Male, 0%<br/>Female, 100%<br/>Race/ Ethnicity:<br/>Latino/a, 100%<br/>Non-Hispanic White, 0%<br/>Non-Hispanic Black, 0%<br/>Asian, 0%<br/>Cancer Type(s): Breast<br/>Survivorship Timing (Range): 12-60<br/>Stratified by Latino/a Subgroups: N</p>                                                                                            | <p>Physical, Psychological, Social, Spiritual, Overall</p> | <p>In multivariate analysis, unemployment, getting a mastectomy, and comorbidities increased the odds of functional limitations among Latina breast cancer survivors. Women with comorbidities were also more likely to report being in poor or fair self-rated health. Cancer self-efficacy was protective against both functional limitations and poor/fair health. Spiritual well-being and social support were not associated with functional limitations or self-rated health.</p> |
| <p>Napoles, A. M., 2017[114]<br/>(21/22) (10/10)</p> | <p><b>Study design:</b><br/>Mixed-Methods</p> <p><b>Data Collection:</b><br/>Surveys, Interviews</p>   | <p>Not reported</p>                       | <p><b>Sample Size:</b> 143<br/><b>Participant Characteristics:</b><br/>Average Age (SD): Phone: 54.9, (12.3); In-Person: 57.2, (11.8)<br/>Gender:<br/>Male, 0<br/>Female, 100%<br/>Race/ Ethnicity:<br/>Latino/a, 100%<br/>Non-Hispanic White, 0%<br/>Non-Hispanic Black, 0%<br/>Asian, 0%<br/>Cancer Type(s): Breast<br/>Survivorship Timing (Not Specified): Not Specified<br/>Stratified by Latino/a Subgroups: Y</p>                                             | <p>Physical, Psychological, Social</p>                     | <p>Among Latina cancer survivors, the transition from active treatment to follow-up care has a lot of "vulnerability," increased need, and lack of social support.</p>                                                                                                                                                                                                                                                                                                                  |
| <p>Napoles, A. M. 2019 [115]</p>                     | <p><b>Study Design:</b><br/>Mixed methods</p> <p><b>Data Collection:</b><br/>Survey, Interviews</p>    | <p>Not reported</p>                       | <p><b>Sample Size:</b> 23<br/><b>Participant Characteristics:</b><br/>Age Mean (SD): 55.8 (13.1)<br/>Gender:<br/>Male, 0.0%<br/>Female, 100.0%<br/>Race/ Ethnicity:<br/>Latino/a, 100.0%<br/>Non-Hispanic White, 0.0%<br/>Non-Hispanic Black, 0.0%</p>                                                                                                                                                                                                               | <p>Physical, Psychological</p>                             | <p>In this intervention study testing the efficacy of a multicomponent breast cancer survivorship care plan designed for Spanish-speaking breast cancer survivors, compared with baseline, Latina breast cancer survivors reported lower levels of fatigue and health distress post intervention. Moreover, emotional well-being also improved post-intervention. In debriefing interviews, survivors also noted that the intervention</p>                                              |



|                                     |                                                                                               |              |                                                                                                                                                                                                                                                                                                                                                                    |                                           |                                                                                                                                                                                                                                                                                                                                                   |
|-------------------------------------|-----------------------------------------------------------------------------------------------|--------------|--------------------------------------------------------------------------------------------------------------------------------------------------------------------------------------------------------------------------------------------------------------------------------------------------------------------------------------------------------------------|-------------------------------------------|---------------------------------------------------------------------------------------------------------------------------------------------------------------------------------------------------------------------------------------------------------------------------------------------------------------------------------------------------|
|                                     |                                                                                               |              | Cancer Type(s): Breast<br>Survivorship Timing: Not Specified<br>Stratified by Latino/a Subgroups: N                                                                                                                                                                                                                                                                |                                           | improved digestion, sleep, physical activity, and weight loss.                                                                                                                                                                                                                                                                                    |
| Ochoa, C. Y. 2018 [116]             | <b>Study Design:</b><br>Quantitative Cross-sectional<br><br><b>Data Collection:</b><br>Survey | Not reported | <b>Sample Size:</b> 7778<br><b>Participant Characteristics:</b><br>Age Mean (SD): 67.6 (11.92)<br>Gender:<br>Male, 45.2%<br>Female, 54.8%<br>Race/ Ethnicity:<br>Latino/a, 8.9%<br>Non-Hispanic 91.1%<br>Cancer Type(s): Breast, Prostate, Colorectal, Bladder, Other<br>Survivorship Timing: 24 to 120 months<br>Stratified by Latino/a Subgroups: No             | Psychological, Social, Spiritual, Overall | Hispanic survivors were more likely to report lower levels of social support among friends compared with non-Hispanic survivors. Moreover, Hispanic survivors reported higher levels of faith compared with non-Hispanics.                                                                                                                        |
| Olagunju, T. O. 2018 [117]          | <b>Study Design:</b><br>Quantitative Cross-sectional<br><br><b>Data Collection:</b><br>Survey | Not reported | <b>Sample Size:</b> 212<br><b>Participant Characteristics:</b><br>Age Range: (Latina only): 29-78<br>Gender:<br>Male, 0.0%<br>Female, 100%<br>Race/ Ethnicity:<br>Latino/a, 72.6%<br>Non-Latina: 27.6%<br>Cancer Type(s): Breast<br>Survivorship Timing: 17.7 months (Latina only)<br>Stratified by Latino/a Subgroups: No                                         | Physical, Psychological                   | At baseline, there were no significant differences between Latinas and non-Latinas in overall perceived health status, general mental health, or general physical health. However, Latinas reported more physical and psychological symptoms as reported in the Breast Cancer Prevention Trial checklist compared to non-Latinas (p-value=0.003). |
| Oron, H., 2017[118]<br><br>(20/22)  | <b>Study design:</b><br>Quantitative Longitudinal<br><br><b>Data Collection:</b><br>Survey    | Not reported | <b>Sample Size:</b> 1508<br><b>Participant Characteristics:</b><br>Average Age (SD): 66.67, (7.97)<br>Gender:<br>Male, 100%<br>Female, 0%<br>Race/ Ethnicity:<br>Latino/a, 7.03%<br>Non-Hispanic White, 80.77%<br>Non-Hispanic Black, 12.20%<br>Asian, 0%<br>Cancer Type(s): Prostate<br>Timing <b>After Treatment:</b> 1.5<br>Stratified by Latino/a Subgroups: N | Physical                                  | Among men receiving survey, Hispanics had worse bowel function after surgery compared with Whites, though the differences were eliminated over time. Among men on active surveillance, Hispanics reported less sexual bother than Whites.                                                                                                         |
| Osann, K., 2014[119]<br><br>(21/22) | <b>Study design:</b><br>Quantitative Cross-Sectional<br><br><b>Data Collection:</b><br>Survey | Not reported | <b>Sample Size:</b> 204<br><b>Participant Characteristics:</b><br>Average Age (SD): 44.7, (9.6)<br>Gender:<br>Male, 0%<br>Female, 100%<br>Race/ Ethnicity:<br>Latino/a, 40.7%                                                                                                                                                                                      | Physical, Psychological, Social, Overall  | There were no statistically significant differences between Hispanics and non-Hispanics on sleep problems, overall QOL, perceived stress, social support, depression, or anxiety in a cohort of cervical cancer survivors.                                                                                                                        |

|                                         |                                                                                                          |                                        |                                                                                                                                                                                                                                                                                                                                                                                                                                        |                                    |                                                                                                                                                                                                                                                                                                                                                                                                                                                                                                                                                                 |
|-----------------------------------------|----------------------------------------------------------------------------------------------------------|----------------------------------------|----------------------------------------------------------------------------------------------------------------------------------------------------------------------------------------------------------------------------------------------------------------------------------------------------------------------------------------------------------------------------------------------------------------------------------------|------------------------------------|-----------------------------------------------------------------------------------------------------------------------------------------------------------------------------------------------------------------------------------------------------------------------------------------------------------------------------------------------------------------------------------------------------------------------------------------------------------------------------------------------------------------------------------------------------------------|
|                                         |                                                                                                          |                                        | <p>Non-Hispanic White, 51.5%<br/> Non-Hispanic Black, 2.0%<br/> Asian/ Pacific Islander, 5.4%<br/> Native American, 0.5%</p> <p>Cancer Type(s): Cervical<br/> Survivorship Timing (Mean): 19.2<br/> Stratified by Latino/a Subgroups: N</p>                                                                                                                                                                                            |                                    |                                                                                                                                                                                                                                                                                                                                                                                                                                                                                                                                                                 |
| Owens, B., 2009[120]<br><br>(21/22)     | <p><b>Study design:</b><br/> Quantitative Cross-Sectional</p> <p><b>Data Collection:</b><br/> Survey</p> | Self-Help Model                        | <p><b>Sample Size:</b> 125<br/> <b>Participant Characteristics:</b><br/> Average Age (SD): 54, (10.05)<br/> Gender:<br/> Male, 0%<br/> Female, 100%<br/> Race/ Ethnicity:<br/> Latino/a, 100%<br/> Non-Hispanic White, 0%<br/> Non-Hispanic Black, 0%<br/> Asian, 0%<br/> Cancer Type(s): Breast<br/> Survivorship Timing (Not Specified): Not Specified<br/> Stratified by Latino/a Subgroups: N</p>                                  | Physical, Psychological, Spiritual | The most frequent side-effects were depression (78%), hair loss (70%), and arm weakness and hot flashes (both 67%). The most bothersome symptoms (unbearable or very upsetting) were fatigue (62%), hair loss (53%) and depression (43%). And the most bothersome and unmanageable side effects were bowel problems and nausea. The most used complimentary therapy was prayer (93%), and humor (83%). Depression and prayer were significantly and positively associated; there were no other associations between complimentary therapy use and side effects. |
| Pakiz, B., 2016[121]<br><br>(22/22)     | <p><b>Study design:</b><br/> Quantitative Cross-Sectional</p> <p><b>Data Collection:</b><br/> Survey</p> | Not reported                           | <p><b>Sample Size:</b> 692<br/> <b>Participant Characteristics:</b><br/> Average Age (SD): 56, (9)<br/> Gender:<br/> Male, 0%<br/> Female, 100%<br/> Race/ Ethnicity:<br/> Latino/a, 6.65%<br/> Non-Hispanic White, 79.05%<br/> Non-Hispanic Black, 10.26%<br/> Asian, 1.59%<br/> Mixed/ Other, 2.17%<br/> Cancer Type(s): Breast<br/> Survivorship Timing (Mean): 32.4<br/> Stratified by Latino/a Subgroups: N</p>                   | Physical, Psychological            | Hispanic participants reported higher IOC positive impact scores, which denotes more meaning and positive impact from their cancer experience, compared to non-Hispanic whites. There were no significant differences between non-Hispanic Whites and Hispanics regarding physical QOL or mental QOL.                                                                                                                                                                                                                                                           |
| Pandya, D. M., 2011[122]<br><br>(19/22) | <p><b>Study design:</b><br/> Quantitative Cross-Sectional</p> <p><b>Data Collection:</b><br/> Survey</p> | Quality of Life in Cancer Survivorship | <p><b>Sample Size:</b> 55<br/> <b>Participant Characteristics:</b><br/> Average Age (SD): 54.3, (17.1)<br/> Gender:<br/> Male, 58.2%<br/> Female, 41.8%<br/> Race/ Ethnicity:<br/> Latino/a, 54.5%<br/> Non-Hispanic White, 36.4%<br/> Non-Hispanic Black, 9.1%<br/> Asian, 0%<br/> Cancer Type(s): Leukemia (ALL, AML, CLL, CML)<br/> Survivorship Timing (Not Specified): Not Specified<br/> Stratified by Latino/a Subgroups: N</p> | Psychological, Social              | Compared to Whites (5%), African Americans (40%) and Hispanics (37%) were most unable to cope with finances (p-value=.016). Fear of recurrence was higher in Hispanics (67%), compared to African Americans (40%) and Whites (30%) (p-value=.031). Hispanics (40%) experienced more problems with housing, insurance, and work, as compared to African Americans (20%) and Whites (10%) (p-value .047). Hispanics had smaller number of people in their social support networks (mean: 12.2) than Whites (16.7).                                                |

|                                         |                                                                                                        |              |                                                                                                                                                                                                                                                                                                                                                                                                                 |                                          |                                                                                                                                                                                                                                                                                                                                                                                                                                                                                                                                                                                               |
|-----------------------------------------|--------------------------------------------------------------------------------------------------------|--------------|-----------------------------------------------------------------------------------------------------------------------------------------------------------------------------------------------------------------------------------------------------------------------------------------------------------------------------------------------------------------------------------------------------------------|------------------------------------------|-----------------------------------------------------------------------------------------------------------------------------------------------------------------------------------------------------------------------------------------------------------------------------------------------------------------------------------------------------------------------------------------------------------------------------------------------------------------------------------------------------------------------------------------------------------------------------------------------|
| Papaleontiou, 2019 [123]                | <p><b>Study Design:</b><br/>Quantitative</p> <p><b>Data Collection:</b><br/>Survey</p>                 | Not Reported | <p><b>Sample Size:</b> 2215</p> <p><b>Participant Characteristics:</b><br/>Age Range: 18-79<br/>Gender:<br/>Male, 21.8%<br/>Female, 78.2%<br/>Race/ Ethnicity:<br/>Latino/a, 20.6%<br/>Non-Hispanic White, 54.3%<br/>Non-Hispanic Black, 12.2%<br/>Asian, 10.9%<br/>Cancer Type(s): Thyroid cancer<br/>Survivorship Timing: Not Specified<br/>Stratified by Latino/a Subgroups: N</p>                           | Psychological                            | Among this cohort of thyroid cancer patients, Hispanics were more worried than Whites about harms from their thyroid cancer treatment (OR: 1.81, 95% CI: 1.39–2.36), change in QOL (OR: 1.46, 95%CI: 1.12–1.90), family being at risk for thyroid cancer (OR 1.51 , 95%CI: 1.14–1.99], and about death (OR: 1.41 , 95%CI 1.09–1.83).                                                                                                                                                                                                                                                          |
| Park, J. 2019 [124]                     | <p><b>Study Design:</b><br/>Quantitative Cross-sectional</p> <p><b>Data Collection:</b><br/>Survey</p> | Not Reported | <p><b>Sample Size:</b> 169</p> <p><b>Participant Characteristics:</b><br/>Age Range: 29.4 to 60.1<br/>Gender:<br/>Male, 62.7%<br/>Female, 37.3%<br/>Race/ Ethnicity:<br/>Latino/a, 39.6%<br/>Non-Hispanic, 60.4 %<br/>Cancer Type(s): Hematologic<br/>Survivorship Timing: 60 months<br/>Stratified by Latino/a Subgroups: No</p>                                                                               | Social, Physical                         | Survivors who reported clinically meaningful levels of fatigue were more likely to be non-Hispanic compared to those without fatigue (p-value=0.008). Hispanics reported more difficulties with extend family relationship adjustment (p-value=0.002)                                                                                                                                                                                                                                                                                                                                         |
| Patel, S. K., 2013[125]<br><br>(21/22)  | <p><b>Study design:</b><br/>Quantitative Cross-Sectional</p> <p><b>Data Collection:</b><br/>Survey</p> | Not reported | <p><b>Sample Size:</b> 73</p> <p><b>Participant Characteristics:</b><br/>Average Age (SD): 12.0, (3.9)<br/>Gender:<br/>Male, 57.5%<br/>Female, 42.5%<br/>Race/ Ethnicity:<br/>Latino/a, 100%<br/>Non-Hispanic White, 0%<br/>Non-Hispanic Black, 0%<br/>Asian, 0%<br/>Cancer Type(s): "Childhood": Acute leukemia, brain tumors<br/>Survivorship Timing (Mean): 85.2<br/>Stratified by Latino/a Subgroups: N</p> | Physical, Psychological, Social          | Half of the Latina cancer survivors reported high difficulties in attention, school-based learning, and peer relations. Those with parents not adherent to the Non-Hispanic White culture had more problems with peer relations and executive functioning.                                                                                                                                                                                                                                                                                                                                    |
| Paxton, R. J., 2012[126]<br><br>(22/22) | <p><b>Study design:</b><br/>Quantitative Cross-Sectional</p> <p><b>Data Collection:</b><br/>Survey</p> | Not reported | <p><b>Sample Size:</b> 3013</p> <p><b>Participant Characteristics:</b><br/>Average Age (SD): Not reported<br/>Gender:<br/>Male, 0%<br/>Female, 100%<br/>Race/ Ethnicity:<br/>Latino/a, 6%<br/>Non-Hispanic White, 87%<br/>Non-Hispanic Black, 4%<br/>Asian, 3%<br/>Cancer Type(s): Breast<br/>Survivorship Timing (Median): 24<br/>Stratified by Latino/a Subgroups: N</p>                                      | Physical, Psychological, Social, Overall | Hispanic and Black breast cancer survivors had significantly lower Physical health scores compared to Asian American and White survivors. Hispanic breast cancer survivors who met physical activity guideline recommendations reported significantly higher overall QOL, physical QOL and mental QOL compared to Hispanic survivors who did not meet Physical activity guideline recommendations. However, there were no statistically significant differences in social function, emotional role, or pain between Hispanics who met the physical activity guidelines and those who did not. |

|                                                  |                                                                                                                        |                                        |                                                                                                                                                                                                                                                                                                                                                                                                                                                                                                                            |                                        |                                                                                                                                                                                                                                                                                                                                                                                                                                      |
|--------------------------------------------------|------------------------------------------------------------------------------------------------------------------------|----------------------------------------|----------------------------------------------------------------------------------------------------------------------------------------------------------------------------------------------------------------------------------------------------------------------------------------------------------------------------------------------------------------------------------------------------------------------------------------------------------------------------------------------------------------------------|----------------------------------------|--------------------------------------------------------------------------------------------------------------------------------------------------------------------------------------------------------------------------------------------------------------------------------------------------------------------------------------------------------------------------------------------------------------------------------------|
| <p>Pfaendler, K. S., 2015[127]</p> <p>(N/A)</p>  | <p><b>Study design:</b><br/>Review</p> <p><b>Data Collection:</b><br/>N/A</p>                                          | <p>Not reported</p>                    | <p>Sample Size: 52 articles cited<br/>Cancer Type: Cervical</p>                                                                                                                                                                                                                                                                                                                                                                                                                                                            | <p>Social, Physical, Psychological</p> | <p>LCS "framed their faith in God as a mainstay for their recovery" and more of an emphasis on social support, while mainly only seeking social support from family. Important to note that only one article in the entire review discusses LCS.</p>                                                                                                                                                                                 |
| <p>Phillips, F., 2014[128]</p> <p>(8/10)</p>     | <p><b>Study design:</b><br/>Qualitative</p> <p><b>Data Collection:</b><br/>Semi-structured Interviews</p>              | <p>Resiliency and Health Promotion</p> | <p><b>Sample Size:</b> 14<br/><b>Participant Characteristics:</b><br/>Age Range: 16-29<br/>Gender:<br/>Male, 21.57%<br/>Female, 78.57%<br/>Race/ Ethnicity:<br/>Latino/a, 100%<br/>Non-Hispanic White, 0%<br/>Non-Hispanic Black, 0%<br/>Asian, 0%<br/>Cancer Type(s): Pediatric: Pineal gland tumor, ALL, Ewing sarcoma, retinoblastoma, leukemia, AML, ovarian, Hodgkin's lymphoma, brain tumor<br/>Survivorship Timing (Range): 24-216<br/>Stratified by Latino/a Subgroups: N</p>                                      | <p>Psychological, Social</p>           | <p>Support from family and hospital staff played an important role in helping AYA survivors cope with their cancer diagnosis and treatment. While AYAs maintained a positive perspective on their cancer experience, they also expressed worry and concern, especially in their vulnerability to relapse. Survivors also felt cancer was now part of their identity and embraced the beneficial aspects of their cancer journey.</p> |
| <p>Pinheiro, L. C., 2015[129]</p> <p>(22/22)</p> | <p><b>Study design:</b><br/>Quantitative Cross-Sectional</p> <p><b>Data Collection:</b><br/>Survey, Administrative</p> | <p>Not reported</p>                    | <p><b>Sample Size:</b> 1778 survivors, 8,890 matched controls<br/><b>Participant Characteristics (of 1778 survivors):</b><br/>Average Age (SD): Not Specified<br/>Gender:<br/>Male, 66.76%<br/>Female, 44.24%<br/>Race/ Ethnicity:<br/>Latino/a, 7.54%<br/>Non-Hispanic White, 77.17%<br/>Non-Hispanic Black, 7.65%<br/>Asian, 7.65%<br/>Cancer Type(s): Breast, colorectal, and prostate<br/>Survivorship Timing (Not Specified): Not Specified<br/>Stratified by Latino/a Subgroups: N</p>                               | <p>Psychological, Physical, Social</p> | <p>From baseline to follow up, Hispanics with cancer experienced larger decreases in scores on the role-emotional subscale compared to Whites (-14.3 vs. -6.7). However, Hispanic patients had significantly smaller decrease in mean vitality scores compared to Whites (-3.3 vs. -7.5).</p>                                                                                                                                        |
| <p>Pisu, M. , 2015[130]</p> <p>(21/22)</p>       | <p><b>Study design:</b><br/>Quantitative Longitudinal</p> <p><b>Data Collection:</b><br/>Survey</p>                    | <p>Not reported</p>                    | <p><b>Sample Size:</b> 3432<br/><b>Participant Characteristics:</b><br/>Average Age (SD): Not Specified<br/>Gender:<br/>Male, Lung: 51%, Colorectal: 54.3%<br/>Female, Lung: 49%, Colorectal: 45.7%<br/>Race/ Ethnicity:<br/>Latino/a, Lung: 4.8%, Colorectal: 8.4%<br/>Non-Hispanic White, Lung: 83.1%, Colorectal: 76.3%<br/>Non-Hispanic Black, Lung: 12.2%, Colorectal: 15.2%<br/>Asian, 0%<br/>Cancer Type(s): Lung and colorectal<br/>Survivorship Timing at Baseline: 4<br/>Stratified by Latino/a Subgroups: N</p> | <p>Social</p>                          | <p>For both lung and colorectal cancers (CRC), a higher proportion of Hispanics (58%) and African Americans (68%) reported financial hardship compared to Whites (50% for lung and 40% for CRC). Among lung cancer and CRC survivors, the relationship between ethnicity and financial hardship was not statistically significant.</p>                                                                                               |

|                                                  |                                                                                                        |                            |                                                                                                                                                                                                                                                                                                                                                                                                                                                                                                                                                                                                                                                                                                               |                              |                                                                                                                                                                                                                                                                                                                                                                                                                                                                                                |
|--------------------------------------------------|--------------------------------------------------------------------------------------------------------|----------------------------|---------------------------------------------------------------------------------------------------------------------------------------------------------------------------------------------------------------------------------------------------------------------------------------------------------------------------------------------------------------------------------------------------------------------------------------------------------------------------------------------------------------------------------------------------------------------------------------------------------------------------------------------------------------------------------------------------------------|------------------------------|------------------------------------------------------------------------------------------------------------------------------------------------------------------------------------------------------------------------------------------------------------------------------------------------------------------------------------------------------------------------------------------------------------------------------------------------------------------------------------------------|
| <p>Poghosyan, H., 2016[131]<br/><br/>(21/22)</p> | <p><b>Study design:</b><br/>Quantitative Cross-Sectional</p> <p><b>Data Collection:</b><br/>Survey</p> | <p>Direct-Effect Model</p> | <p><b>Sample Size:</b> 8055<br/><b>Participant Characteristics:</b><br/>Average Age (SD): 51.0, (0.33)<br/>Gender:<br/>Male, 40.8%<br/>Female, 59.2%<br/>Race/ Ethnicity:<br/>Latino/a, 2.5%<br/>Non-Hispanic White, 89.5%<br/>Non-Hispanic Black, 3.4%<br/>Asian, 4.6%<br/>Cancer Type(s): Breast, prostate, colon, lung, melanoma/ other skin, other, unknown<br/>Survivorship Timing (Mean): 135.6<br/>Stratified by Latino/a Subgroups: N</p>                                                                                                                                                                                                                                                             | <p>Psychological</p>         | <p>In a nationally representative sample of cancer survivors, Hispanic current smokers were not significantly more likely than Hispanic never smokers to report infrequent or frequent mental distress.</p>                                                                                                                                                                                                                                                                                    |
| <p>Polek, C. 2019 [132]</p>                      | <p><b>Study Design:</b><br/>Qualitative</p> <p><b>Data Collection:</b><br/>Focus Group</p>             |                            | <p><b>Sample Size:</b> 13<br/><b>Participant Characteristics:</b><br/>Age Range: 43 to 77 years<br/>Gender:<br/>Male, 0.0%<br/>Female, 100.0%<br/>Race/ Ethnicity:<br/>Latino/a, 100.0%<br/>Non-Hispanic White, 0.0%<br/>Non-Hispanic Black, 0.0%<br/>Asian, %<br/>Cancer Type(s): Breast<br/>Survivorship Timing: 48 to 240 months<br/>Stratified by Latino/a Subgroups: Yes</p>                                                                                                                                                                                                                                                                                                                             | <p>Social, Psychological</p> | <p>In this qualitative study, Hispanic cancer survivors reported personal and structural communication barriers, the importance of social and family support from family support following diagnosis, and survivors' experience with emotional isolation. These themes were independent of residence and across ethnic subgroups, but findings suggest that urban Hispanic breast cancer survivors may possess greater levels of burden.</p>                                                   |
| <p>Prince, P., 2015[133]<br/><br/>(20/22)</p>    | <p><b>Study design:</b><br/>Quantitative Cross-Sectional</p> <p><b>Data Collection:</b><br/>Survey</p> | <p>Not reported</p>        | <p><b>Sample Size:</b> 171<br/><b>Participant Characteristics:</b><br/>Age Range: 19-76<br/>Gender:<br/>Male, Hispanic: 55.1%, Non-Hispanic: 67.7%<br/>Female, Hispanic: 44.9%, Non-Hispanic: 32.3%<br/>Race/ Ethnicity:<br/>Hispanic, 40.35%<br/>Hispanic White, 35.3%<br/>Hispanic Other, 64.7%<br/>Non-Hispanic White, 63.7%<br/>Non-Hispanic Black, 14.7%<br/>Non-Hispanic Asian, 17.6%<br/>Non-Hispanic Other, 3.9%<br/>Cancer Type(s): Hematological disease, leukemia, lymphoma, myeloma, myelodysplastic syndrome, non-hematological malignancy (solid tumor)<br/>Survivorship Timing (Range Since HSCT (hematopoietic stem cell transplantation)) 36-192<br/>Stratified by Latino/a Subgroups: N</p> | <p>Spiritual, Overall</p>    | <p>Hispanic survivors had significantly higher spiritual well-being WB than non-Hispanics (F = 4.96, p = .03), including higher levels of Meaning (F = 5.24, p = .023) and Faith (F = 5.11, p = .025) but not Peace (F = 1.36, p = .25). Overall HRQOL (FACT-G) were not statistically significantly different between groups. Spiritual well-being subscales (meaning, peace but not faith) were significant predictors of HRQOL for the study population (not accounting for ethnicity).</p> |
| <p>Raghubar, K. P. 2019 [134]</p>                | <p><b>Study Design:</b><br/>Quantitative Cross-sectional</p> <p><b>Data Collection:</b><br/>Survey</p> | <p>N/A</p>                 | <p><b>Sample Size:</b> 114<br/><b>Participant Characteristics:</b><br/>Age Mean (SD) (Hispanic only) 14.22 (3.93)<br/>Gender: (Hispanic only)<br/>Male, 58.8%<br/>Female, 41.2%</p>                                                                                                                                                                                                                                                                                                                                                                                                                                                                                                                           | <p>Social</p>                | <p>Although independent correlations between adaptive skills and Hispanic ethnicity existed, after controlling for primary education and family income, there was no effect of ethnicity on social functioning (p=0.48).</p>                                                                                                                                                                                                                                                                   |

|                                        |                                                                                                                                 |                                                                                                                                                                                                              |                                                                                                                                                                                                                                                                                                                                                                                                                                                                                                                                                        |                                                     |                                                                                                                                                                                                                                                                                                                                                                                                                                                             |
|----------------------------------------|---------------------------------------------------------------------------------------------------------------------------------|--------------------------------------------------------------------------------------------------------------------------------------------------------------------------------------------------------------|--------------------------------------------------------------------------------------------------------------------------------------------------------------------------------------------------------------------------------------------------------------------------------------------------------------------------------------------------------------------------------------------------------------------------------------------------------------------------------------------------------------------------------------------------------|-----------------------------------------------------|-------------------------------------------------------------------------------------------------------------------------------------------------------------------------------------------------------------------------------------------------------------------------------------------------------------------------------------------------------------------------------------------------------------------------------------------------------------|
|                                        |                                                                                                                                 |                                                                                                                                                                                                              | <p>Race/ Ethnicity:<br/>         Latino/a, 29.8%<br/>         Non-Hispanic White, 50.9%<br/>         Other, 19.3 %<br/>         Cancer Type(s):<br/>         Survivorship Timing: 84 months<br/>         Stratified by Latino/a Subgroups:</p>                                                                                                                                                                                                                                                                                                         |                                                     |                                                                                                                                                                                                                                                                                                                                                                                                                                                             |
| Ramirez, A. G. 2019 [135]              | <p><b>Study Design:</b><br/>         Quantitative Longitudinal</p> <p><b>Data Collection:</b><br/>         Survey</p>           | <p>Social<br/>         Cognitive<br/>         Theory,<br/>         Stress and<br/>         Coping<br/>         Theory,<br/>         Health<br/>         Behavior<br/>         Change<br/>         Theory</p> | <p><b>Sample Size:</b> 288<br/> <b>Participant Characteristics:</b><br/>         Age (Mean, SD): 56.05 (10.20)<br/>         Gender:<br/>             Male, 46.2%<br/>             Female, 53.8%<br/>         Race/ Ethnicity:<br/>             Latino/a, 100%<br/>             Non-Hispanic White, 0.0%<br/>             Non-Hispanic Black, 0.0 %<br/>             Asian, 0.0%<br/>         Cancer Type(s): Breast, Colorectal, Prostate<br/>         Survivorship Timing: Not Specified<br/>         Stratified by Latino/a Subgroups: No</p>        | Overall                                             | <p>Male Latino colorectal cancer participants randomized to a Patient Navigator LIVESTRONG Cancer Navigation services intervention demonstrated a greater overall HRQOL at a 3-month follow-up compared to those that were randomized to patient navigation alone, and female Latina cancer patients experienced a greater cancer-specific HRQOL at 3-, 6-, and 15- month follow-up compared to those what were randomized to patient navigation alone.</p> |
| Reyes, M. E., 2017[136]<br><br>(21/22) | <p><b>Study design:</b><br/>         Quantitative Longitudinal</p> <p><b>Data Collection:</b><br/>         Survey, Registry</p> | <p>Not reported</p>                                                                                                                                                                                          | <p><b>Sample Size:</b> 3734<br/> <b>Participant Characteristics:</b><br/>         Average Age (SD): Not Specified<br/>         Gender:<br/>             Male, 58.0%<br/>             Female, 41.9%<br/>         Race/ Ethnicity:<br/>             Latino/a, 9.8%<br/>             Non-Hispanic White, 77.7%<br/>             Non-Hispanic Black, 8.5%<br/>             Asian, 4.1%<br/>         Cancer Type(s): Colorectal<br/>         Survivorship Timing (Longitudinal Baseline Range): &gt;12<br/>         Stratified by Latino/a Subgroups: N</p> | <p>Physical, Psychological,<br/>         Social</p> | <p>In bivariate analysis, Hispanics had a 1.35-fold increased risk of poor PCS compared to White CRC patients. In multivariate analysis, the risk narrowed to 1.21 and was only marginally statistically significant (p=0.089).</p>                                                                                                                                                                                                                         |
| Ritt-Olson, 2018 [137]                 | <p><b>Study Design:</b><br/>         Quantitative</p> <p><b>Data Collection:</b><br/>         Survey</p>                        | <p>Not Specified</p>                                                                                                                                                                                         | <p><b>Sample Size:</b> 194<br/> <b>Participant Characteristics:</b><br/>         Age Range: 15-25<br/>         Gender:<br/>             Male, 50.6%<br/>             Female, 49.4%<br/>         Race/ Ethnicity:<br/>             Latino/a, 46.9%<br/>             Non-Latino, 53.1%<br/>         Cancer Type(s): Multiple<br/>         Survivorship Timing: Not Specified<br/>         Stratified by Latino/a Subgroups: N</p>                                                                                                                        | <p>Psychological, Overall</p>                       | <p>In this sample of adolescent and young adult cancer survivors, Latinos had higher depressive symptoms and lower HRQOL compared to non-Latino. Among Latinos, higher levels of acculturation were associated with depression and poorer HRQOL, with more acculturated males being more likely to have higher levels of depression compared to less acculturated males or females.</p>                                                                     |

|                                           |                                                                                                        |                     |                                                                                                                                                                                                                                                                                                                                                                                                                                                                                                                                 |                                                   |                                                                                                                                                                                                                                                                                                                                                                                                                                                                                                                                                                                                                                           |
|-------------------------------------------|--------------------------------------------------------------------------------------------------------|---------------------|---------------------------------------------------------------------------------------------------------------------------------------------------------------------------------------------------------------------------------------------------------------------------------------------------------------------------------------------------------------------------------------------------------------------------------------------------------------------------------------------------------------------------------|---------------------------------------------------|-------------------------------------------------------------------------------------------------------------------------------------------------------------------------------------------------------------------------------------------------------------------------------------------------------------------------------------------------------------------------------------------------------------------------------------------------------------------------------------------------------------------------------------------------------------------------------------------------------------------------------------------|
| <p>Ross, L. E., 2008[138]<br/>(17/22)</p> | <p><b>Study design:</b><br/>Quantitative Cross-Sectional</p> <p><b>Data Collection:</b><br/>Survey</p> | <p>Not reported</p> | <p><b>Sample Size:</b> 2262<br/><b>Participant Characteristics:</b><br/>Age Range: 18+<br/>Gender:<br/>Male, 43.1%<br/>Female, 56.9%<br/>Race/ Ethnicity:<br/>Latino/a, 3.3%<br/>Non-Hispanic White, 90.6%<br/>Non-Hispanic Black, 4.5%<br/>Asian, 0%<br/>Non-Hispanic Other, 1.6%<br/>Cancer Type(s): Breast, colorectal, prostate, "short survival" (including pancreas, lung, esophagus, liver, and stomach), skin, other<br/>Survivorship Timing (Not Specified): Not Specified<br/>Stratified by Latino/a Subgroups: N</p> | <p>Physical, Spiritual</p>                        | <p>There were no differences in report of praying for one's health between Hispanic cancer patients and their White counterparts (p=0.342). Compared to Whites, a lower proportion of Hispanic patients (72.9% vs. 59.3%, p=0.018) reported good or better Physical health, although in adjusted analysis Physical health status was not statistically significantly different between the two groups.</p>                                                                                                                                                                                                                                |
| <p>Rossi, A., 2017[139]<br/>(22/22)</p>   | <p><b>Study design:</b><br/>Quantitative Cross-Sectional</p> <p><b>Data Collection:</b><br/>Survey</p> | <p>Not reported</p> | <p><b>Sample Size:</b> 62<br/><b>Participant Characteristics:</b><br/>Average Age (SD): 63.1, (10.0)<br/>Gender:<br/>Male, 0%<br/>Female, 100%<br/>Race/ Ethnicity:<br/>Latino/a, 30%<br/>Non-Hispanic White, 32%<br/>Non-Hispanic Black, 32%<br/>Asian, 0%<br/>Other, 7%<br/>Cancer Type(s): Endometrial<br/>Survivorship Timing (Mean): 30<br/>Stratified by Latino/a Subgroups: N</p>                                                                                                                                        | <p>Overall</p>                                    | <p>At baseline, Hispanics had higher overall HRQOL (FACT-G/En) compared to Whites. Multivariate analysis showed a moderate effect size for difference in QOL (FACT-G/En) between Whites and Hispanics, although this difference was not statistically significant.</p>                                                                                                                                                                                                                                                                                                                                                                    |
| <p>Rush, C. L., 2016[140]<br/>(21/22)</p> | <p><b>Study design:</b><br/>Quantitative Longitudinal</p> <p><b>Data Collection:</b><br/>Survey</p>    | <p>Not reported</p> | <p><b>Sample Size:</b> 136<br/><b>Participant Characteristics:</b><br/>Average Age (SD): 53.2, (11.1)<br/>Gender:<br/>Male, 0<br/>Female, 100%<br/>Race/ Ethnicity:<br/>Hispanic/ Latina, 100%<br/>Hispanic White, 6%<br/>Hispanic Black, 29%<br/>More than One Race, 43%<br/>Don't Know/ Unsure/ Prefer Not to Answer, 22%<br/>Cancer Type(s): Breast<br/>Survivorship Timing (Mean): 39.72<br/>Stratified by Latino/a Subgroups: N</p>                                                                                        | <p>Physical, Psychological, Social, Spiritual</p> | <p>At baseline and follow-up about 80% of survivors reported using devotional and spiritual practices, including church attendance, prayer, religious group and church attendance. LCS engaged in devotional and spiritual practices had lower anxiety (B= -7.51, p &lt; 0.05), fatigue (B = -7.74, p &lt; 0.05) and depression (B = -6.60, p &lt; 0.05) over time. CAM use associated with better physical function (B = 3.48, p &lt; 0.05), decreased satisfaction with social roles (B = -6.56, p &lt; 0.01).. Use of devotional and spiritual practices not associated with physical function and satisfaction with social roles.</p> |

|                                    |                                                                                                        |                                                          |                                                                                                                                                                                                                                                                                                                                                                              |                                                     |                                                                                                                                                                                                                                                                                                                                                                                                                                                                                        |
|------------------------------------|--------------------------------------------------------------------------------------------------------|----------------------------------------------------------|------------------------------------------------------------------------------------------------------------------------------------------------------------------------------------------------------------------------------------------------------------------------------------------------------------------------------------------------------------------------------|-----------------------------------------------------|----------------------------------------------------------------------------------------------------------------------------------------------------------------------------------------------------------------------------------------------------------------------------------------------------------------------------------------------------------------------------------------------------------------------------------------------------------------------------------------|
| Sanchez-Birkhead, A. C. 2017 [141] | <p><b>Study Design:</b><br/>Quantitative</p> <p><b>Data Collection:</b><br/>Survey</p>                 | Not Specified                                            | <p><b>Sample Size:</b> 48</p> <p><b>Participant Characteristics:</b><br/>Age Range: 35-74<br/>Gender:<br/>Male, 0%<br/>Female, 100%<br/>Race/ Ethnicity:<br/>Latino/a, 100%<br/>Non-Hispanic White, 0%<br/>Non-Hispanic Black, 0%<br/>Asian, 0%<br/>Cancer Type(s): Breast<br/>Survivorship Timing: 0-24 months<br/>Stratified by Latino/a Subgroups: Y</p>                  | Physical, Psychological                             | Among Latina breast cancer survivors served by a community-based program, about 46% rated their physical health as poor or fair, 60% reported moderate to severe fatigue, nearly 80% reported having pain, with 38% reporting moderate to severe pain. Survivors reported mild levels of anxiety and depression but high levels of stress. Number of comorbidities was negatively correlated with physical health status and time since diagnosis was positively correlated with pain. |
| Santee, 2018 [142]                 | <p><b>Study Design:</b><br/>Quantitative Cross-sectional</p> <p><b>Data Collection:</b><br/>Survey</p> | Not Specified                                            | <p><b>Sample Size:</b> 1642</p> <p><b>Participant Characteristics:</b><br/>Age Range 18-65 and older<br/>Gender:<br/>Male, 31.5%<br/>Female, 68.5%<br/>Race/ Ethnicity:<br/>Latino/a, 100%<br/>Non-Hispanic White, 0.0%<br/>Non-Hispanic Black, 0.0%<br/>Cancer Type(s): Any<br/>Survivorship Timing: Not Specified<br/>Stratified by Latino/a Subgroups: No</p>             | Physical, Psychological                             | In this secondary data analysis, female Hispanic/Latino cancer survivors' were nearly two times more likely than males to report high physical HRQoL, and were 2.364 times as likely to report high mental HRQoL.                                                                                                                                                                                                                                                                      |
| Santoyo-Olsson, 2019 [143]         | <p><b>Study Design:</b><br/>Quantitative Cross-sectional</p> <p><b>Data Collection:</b><br/>Survey</p> | Transcreation Framework                                  | <p><b>Sample Size:</b> 153</p> <p><b>Participant Characteristics:</b><br/>Age Range: 28-88<br/>Gender:<br/>Male, 0.0%<br/>Female, 100%<br/>Race/ Ethnicity:<br/>Latino/a, 100%<br/>Non-Hispanic White, 0.0%<br/>Non-Hispanic Black, 0.0%<br/>Cancer Type(s): Breast<br/>Survivorship Timing: 0-204 months<br/>Stratified by Latino/a Subgroups: No</p>                       | Physical, Social, Psychological                     | In the baseline characteristics collected for the intervention study among rural Spanish-speaking Latina breast cancer survivors, about half reported as having poor or fair self-rated health (45.8%) or having financial hardship in the past year (48.4%). Approximately one-third reported having poor or fair self-rated mental health (35.3%).                                                                                                                                   |
| Sammarco, A., 2008[144] (22/22)    | <p><b>Study design:</b><br/>Quantitative Cross-Sectional</p> <p><b>Data Collection:</b><br/>Survey</p> | Uncertainty in Illness Theory; Conceptual Model of HRQOL | <p><b>Sample Size:</b> 89</p> <p><b>Participant Characteristics:</b><br/>Average Age (SD): 57.35, (12.74)<br/>Gender:<br/>Male, 0%<br/>Female, 100%<br/>Race/ Ethnicity:<br/>Latino/a, 100%<br/>Non-Hispanic White, 0%<br/>Non-Hispanic Black, 0%<br/>Asian, 0%<br/>Cancer Type(s): Breast<br/>Survivorship Timing ( Range): 12+<br/>Stratified by Latino/a Subgroups: N</p> | Physical, Psychological, Social, Spiritual, Overall | Perceived social support was positively associated with improvements in overall QOL, and uncertainty was negatively associated with deterioration in QOL. This may suggest that improving social support and decreasing uncertainty in Latina breast cancer survivors may improve QOL in this population.                                                                                                                                                                              |



|                                               |                                                                                                        |                                                                 |                                                                                                                                                                                                                                                                                                                                                                                                                                                                                                                  |                                                            |                                                                                                                                                                                                                                                                                                                                                                                                                                             |
|-----------------------------------------------|--------------------------------------------------------------------------------------------------------|-----------------------------------------------------------------|------------------------------------------------------------------------------------------------------------------------------------------------------------------------------------------------------------------------------------------------------------------------------------------------------------------------------------------------------------------------------------------------------------------------------------------------------------------------------------------------------------------|------------------------------------------------------------|---------------------------------------------------------------------------------------------------------------------------------------------------------------------------------------------------------------------------------------------------------------------------------------------------------------------------------------------------------------------------------------------------------------------------------------------|
| <p>Sammarco, A., 2010[145]</p> <p>(21/22)</p> | <p><b>Study design:</b><br/>Quantitative Cross-Sectional</p> <p><b>Data Collection:</b><br/>Survey</p> | <p>Uncertainty in Illness Theory; Contextual Model of HRQOL</p> | <p><b>Sample Size:</b> 280<br/><b>Participant Characteristics:</b><br/>Average Age (SD): 57.05, 913.81<br/>Gender:<br/>Male, 0%<br/>Female, 100%<br/>Race/ Ethnicity:<br/>Latino/a, 35%<br/>Non-Hispanic White, 65%<br/>Non-Hispanic Black, 0%<br/>Asian, 0%<br/>Cancer Type(s): Breast<br/>Survivorship Timing (Range): 12+<br/>Stratified by Latino/a Subgroups: N</p>                                                                                                                                         | <p>Physical, Psychological, Social, Spiritual, Overall</p> | <p>There were differences between Latina and White breast cancer survivors in perceived Social support, uncertainty, and QOL domains. Notably, Whites reported greater Social support than Latinas, and higher QOL compared to Latinas. Latinas had higher spousal and familial support and levels of uncertainty compared to Whites.</p>                                                                                                   |
| <p>Segrin, C., 2013[146]</p> <p>(21/22)</p>   | <p><b>Study design:</b><br/>Quantitative Longitudinal</p> <p><b>Data Collection:</b><br/>Survey</p>    | <p>Not reported</p>                                             | <p><b>Sample Size:</b> 160 (80 survivors, 80 partners)<br/><b>Participant Characteristics (of survivors):</b><br/>Average Age (SD): Survivor: 47.34, (10.52)<br/>Gender:<br/>Male, 0%<br/>Female, 100%<br/>Race/ Ethnicity:<br/>Hispanic/Latino/a, 19%<br/>Mexican/Mexican American, 78%<br/>South American, 3%<br/>Central American, 1%<br/>Asian/ Pacific Islander, 0%,<br/>Non-Hispanic White, 0%<br/>Cancer Type(s): Breast<br/>Survivorship Timing (Mean): 6.94<br/>Stratified by Latino/a Subgroups: Y</p> | <p>Physical, Psychological</p>                             | <p>There were no significant differences on measures of psychological distress between Latina breast cancer survivors and their supportive partners, though both groups are follow similar trajectories over time. However, physical distress for survivors was greater than their supportive partners though there was no evidence of interdependence on physical measures.</p>                                                            |
| <p>Segrin, 2019 [147]</p>                     | <p><b>Study Design:</b><br/>Quantitative Longitudinal</p> <p><b>Data Collection:</b><br/>Survey</p>    | <p>N/A</p>                                                      | <p><b>Sample Size:</b> 234<br/><b>Participant Characteristics:</b><br/>Age Mean (SD): 50.6<br/>Gender:<br/>Male, 0.0%<br/>Female, 100.0 %<br/>Race/ Ethnicity:<br/>Latino/a, 100%<br/>Non-Hispanic White, 0.0%<br/>Non-Hispanic Black, 0.0%<br/>Cancer Type(s): Breast<br/>Survivorship Timing: ≤12months<br/>Stratified by Latino/a Subgroups: No</p>                                                                                                                                                           | <p>Social, Overall</p>                                     | <p>In this secondary analysis of an intervention study among Latina breast cancer survivors and their caregivers, loneliness was found to be associated with lower HRQoL for both survivors and caregivers. There was also a significant and negative prospective effect of loneliness on HRQoL for survivors but not cregivers.</p>                                                                                                        |
| <p>Segrin, C. 2018 [148]</p>                  | <p><b>Study Design:</b><br/>Quantitative</p> <p><b>Data Collection:</b><br/>Survey</p>                 | <p>The Stress Process Model</p>                                 | <p><b>Sample Size:</b> 230<br/><b>Participant Characteristics:</b><br/>Age Range: &gt;21<br/>Gender:<br/>Male, 0%<br/>Female, 100%<br/>Race/ Ethnicity:<br/>Latino/a, 100%<br/>Non-Hispanic White, 0%<br/>Non-Hispanic Black, 0%<br/>Non-Hispanic Asian, 0%</p>                                                                                                                                                                                                                                                  | <p>Psychological, Social</p>                               | <p>The study examined the predictors of psychological distress among Latina breast cancer survivors and family caregivers, and found that caregiver stress predicted survivors' perception of family discord, which was in turn associated with greater psychological distress among survivors. Conditions that explain distress in survivors appear to operate at similar magnitudes for cancer survivors and their family care givers</p> |

|                                          |                                                                                                  |                                                                |                                                                                                                                                                                                                                                                                                                                                                                                                                                                                   |                                                     |                                                                                                                                                                                                                                                                                                                                                                                                   |
|------------------------------------------|--------------------------------------------------------------------------------------------------|----------------------------------------------------------------|-----------------------------------------------------------------------------------------------------------------------------------------------------------------------------------------------------------------------------------------------------------------------------------------------------------------------------------------------------------------------------------------------------------------------------------------------------------------------------------|-----------------------------------------------------|---------------------------------------------------------------------------------------------------------------------------------------------------------------------------------------------------------------------------------------------------------------------------------------------------------------------------------------------------------------------------------------------------|
|                                          |                                                                                                  |                                                                | Cancer Type(s): Breast<br>Survivorship Timing: ≤12 months<br>Stratified by Latino/a Subgroups: N                                                                                                                                                                                                                                                                                                                                                                                  |                                                     |                                                                                                                                                                                                                                                                                                                                                                                                   |
| Segrin, C. 2019 [149]                    | <b>Study Design:</b><br>Quantitative<br><br><b>Data Collection:</b><br>Survey                    | Not Specified                                                  | <b>Sample Size:</b> 209 (Patients only)<br><b>Participant Characteristics:</b><br>Age Range: ≥18<br>Gender:<br>Male, 0%<br>Female, 100%<br>Race/ Ethnicity:<br>Latino/a, 100%<br>Non-Hispanic White, 0%<br>Non-Hispanic Black, 0%<br>Asian, 0%<br>Cancer Type(s): Breast cancer<br>Survivorship Timing: 6 months (median)<br>Stratified by Latino/a Subgroups: N                                                                                                                  | Physical, Psychological                             | The study examined the interdependence of psychosocial distress and physical symptoms between Latina breast cancer survivors and their caregivers found compelling evidence of interdependence between patients and caregivers for psychosocial distress but not physical symptoms. This was especially true for perceived stress                                                                 |
| Seguin Leclair, 2019 [150]               | <b>Study Design:</b><br>Quantitative Longitudinal<br><br><b>Data Collection:</b><br>Survey       | N/A                                                            | <b>Sample Size:</b> 2337<br><b>Participant Characteristics:</b><br>Age (Mean, SD): 56.2 (11.19)<br>Gender:<br>Male, 39.6%<br>Female, 60.4%<br>Race/ Ethnicity:<br>Latino/a, 2.8%<br>Non-Hispanic White, 89.9%<br>Non-Hispanic Black, 5.0%<br>Other, 1.9%<br>Cancer Type(s): Breast, prostate, colorectal, uterine, NHL, Melanoma, Kidney, Lung, Ovarian, Bladder<br>Survivorship Timing: Average 49.2 months across all three time points<br>Stratified by Latino/a Subgroups: No | Psychological                                       | The proportion of Hispanic survivors in the high fear of recurrence group (9%) was greater than the low (3%) and moderate (2%) groups. In contrast, White survivors were more prominent in the low and moderate fear of recurrence group (91%) compared with the high group (81%).                                                                                                                |
| Shi, Z. 2018 [151]                       | <b>Study Design:</b><br>Quantitative<br><br><b>Data Collection:</b><br>Survey                    | Social Cognitive Theory (SCT) and Transtheoretical Model (TTM) | <b>Sample Size:</b> 70<br><b>Participant Characteristics:</b><br>Age Range: ≥21<br>Gender:<br>Male, 0%<br>Female, 100%<br>Race/ Ethnicity:<br>Latino/a, 100%<br>Non-Hispanic White, 0%<br>Non-Hispanic Black, 0%<br>Asian, 0%<br>Cancer Type(s): Breast<br>Survivorship Timing: Mean: 40.8 months<br>Stratified by Latino/a Subgroups: N                                                                                                                                          | Psychological, Social                               | This study examined the psychosocial mediators of the effect of a culturally tailored dietary intervention on dietary change among Hispanic/Latina breast cancer survivors. The HRQOL in this study were not the target of the study but hospital anxiety/depression, emotional wellbeing and social wellbeing were the same in the control and intervention groups at 6- and 12-month follow-up. |
| Sleight, A. G., 2017[152]<br><br>(10/10) | <b>Study design:</b><br>Qualitative<br><br><b>Data Collection:</b><br>Semi-structured Interviews | Not reported                                                   | <b>Sample Size:</b> 9<br><b>Participant Characteristics:</b><br>Average Age (SD): 53<br>Gender:<br>Male, 0%<br>Female, 100%                                                                                                                                                                                                                                                                                                                                                       | Physical, Spiritual, Social, Psychological, Overall | Cancer diagnosis and resulting treatment side effects limited functional participation in daily activities among these breast cancer survivors. Survivors also reported significant limitations in occupational engagement and relatedly, decreased HRQOL. HRQOL was                                                                                                                              |

|                                        |                                                                                                                          |                                |                                                                                                                                                                                                                                                                                                                                                                                                                                                                                                                                                                 |                                 |                                                                                                                                                                                                                                                                                                           |
|----------------------------------------|--------------------------------------------------------------------------------------------------------------------------|--------------------------------|-----------------------------------------------------------------------------------------------------------------------------------------------------------------------------------------------------------------------------------------------------------------------------------------------------------------------------------------------------------------------------------------------------------------------------------------------------------------------------------------------------------------------------------------------------------------|---------------------------------|-----------------------------------------------------------------------------------------------------------------------------------------------------------------------------------------------------------------------------------------------------------------------------------------------------------|
|                                        |                                                                                                                          |                                | <p>Race/ Ethnicity:<br/>         Latino/a, 100%<br/>         Non-Hispanic White, 0%<br/>         Non-Hispanic Black, 0%<br/>         Asian, 0%</p> <p>Cancer Type(s): Breast<br/>         Survivorship Timing (Range): 27.00-99.96<br/>         Stratified by Latino/a Subgroups: N</p>                                                                                                                                                                                                                                                                         |                                 | also negatively affected by financial concerns. Participation in religious and spiritual activities, service to others and engaging in routine activities, all improved HRQOL.                                                                                                                            |
| Sleight, 2017 [153]                    | <p><b>Study Design:</b><br/>         Quantitative Cross-sectional</p> <p><b>Data Collection:</b><br/>         Survey</p> | N/A                            | <p><b>Sample Size:</b> 99<br/> <b>Participant Characteristics:</b><br/>         Age Range: 30-79<br/>         Gender:<br/>         Male, 0.0%<br/>         Female, 100%<br/>         Race/ Ethnicity:<br/>         Latino/a, 100%<br/>         Non-Hispanic White, 0.0%<br/>         Non-Hispanic Black, 0.0%<br/>         Cancer Type(s): Breast<br/>         Survivorship Timing: 54.2 months<br/>         Stratified by Latino/a Subgroups: No</p>                                                                                                           | Physical, Psychological, Social | In a study of low-income Latina breast cancer survivors, 93% reported at least one unmet need. Items from the physical and daily living domain were the second most frequently reported as unmet needs, as survivors reported being unable to do things they were able to do prior to a cancer diagnosis. |
| Sleight, 2019 [154]                    | <p><b>Study Design:</b><br/>         Quantitative Cross-sectional</p> <p><b>Data Collection:</b><br/>         Survey</p> | N/A                            | <p>Sample Size: 102<br/> <b>Participant Characteristics:</b><br/>         Age Mean (SD) 54.1 (8.7)<br/>         Gender:<br/>         Male, 0.0%<br/>         Female, 100.0%<br/>         Race/ Ethnicity:<br/>         Latino/a, 100.0%<br/>         Non-Hispanic White, 0.0%<br/>         Non-Hispanic Black, 0.0%<br/>         Cancer Type(s): Breast<br/>         Survivorship Timing (Mean): 54.24 months<br/>         Stratified by Latino/a Subgroups: No</p>                                                                                             | Physical, Psychological, Social | Among a sample of low-income Latina breast cancer survivors, a greater number of unmet needs was correlated with lower HRQoL. Moreover, lower income was associated with decreased HRQoL and increased number of supportive care needs.                                                                   |
| Smith, A. B., 2006[155]<br><br>(20/22) | <p><b>Study design:</b><br/>         Quantitative Cross-Sectional</p> <p><b>Data Collection:</b><br/>         Survey</p> | Revised Health Promotion Model | <p><b>Sample Size:</b> 60<br/> <b>Participant Characteristics:</b><br/>         Average Age (SD): 20.33, (4.02)<br/>         Gender:<br/>         Male, 46.7%<br/>         Female, 53.3%<br/>         Race/ Ethnicity:<br/>         Latino/a, 21.5%<br/>         Non-Hispanic White, 68%<br/>         Non-Hispanic Black, 5%<br/>         Asian, 0%<br/>         Other, 5.5%<br/>         Cancer Type(s): Acute leukemia, Hodgkin's disease, lymphoma, other<br/>         Survivorship Timing (Range): 24+<br/>         Stratified by Latino/a Subgroups: N</p> | Social                          | Hispanic cancer survivors scored significantly lower than Whites and African American on measures of interpersonal relations.                                                                                                                                                                             |

|                                                 |                                                                                                                             |                                                                                       |                                                                                                                                                                                                                                                                                                                                                                                                            |                                         |                                                                                                                                                                                                                                                                                                                                                                                                                                                                                                            |
|-------------------------------------------------|-----------------------------------------------------------------------------------------------------------------------------|---------------------------------------------------------------------------------------|------------------------------------------------------------------------------------------------------------------------------------------------------------------------------------------------------------------------------------------------------------------------------------------------------------------------------------------------------------------------------------------------------------|-----------------------------------------|------------------------------------------------------------------------------------------------------------------------------------------------------------------------------------------------------------------------------------------------------------------------------------------------------------------------------------------------------------------------------------------------------------------------------------------------------------------------------------------------------------|
| <p>Smith, A. W., 2009[156]<br/><br/>(22/22)</p> | <p><b>Study design:</b><br/>Quantitative Cross-Sectional</p> <p><b>Data Collection:</b><br/>Survey</p>                      | <p>Not reported</p>                                                                   | <p><b>Sample Size:</b> 736<br/><b>Participant Characteristics:</b><br/>Average Age (SD): 57, (no S.D.)<br/>Gender:<br/>Male, 0%<br/>Female, 100%<br/>Race/ Ethnicity:<br/>Latino/a, 11.41%<br/>Non-Hispanic White, 60.87%<br/>Non-Hispanic Black, 26.77%<br/>Asian, 0%<br/>Cancer Type(s): Breast<br/>Survivorship Timing (Approximate at baseline): 30 months<br/>Stratified by Latino/a Subgroups: N</p> | <p>Overall</p>                          | <p>Among Hispanic women, there was a negative but marginally statistically significant association between physical activity and HRQOL (b=-0.22, p=0.08). For both Black and White women, better Physical activity was statistically significantly associated with better HRQOL.</p>                                                                                                                                                                                                                       |
| <p>Smith, G. L. 2019 [157]</p>                  | <p><b>Study Design</b><br/>Review<br/><b>Data Collection:</b><br/>N/A</p>                                                   | <p>Not Specified</p>                                                                  | <p><b>Sample Size:</b> 598,751<br/><b>Participant Characteristics:</b><br/><b>Age Range:</b> ≥18<br/><b>Gender:</b><br/>Male, 46%<br/>Female, 54%<br/><b>Race/ Ethnicity:</b><br/>Latino/a, %<br/>Non-Hispanic White, 86%<br/>Non-Hispanic Black, %<br/>Asian, %<br/><b>Cancer Type(s):</b><br/><b>Survivorship Timing:</b><br/>Stratified by Latino/a Subgroups: N</p>                                    | <p>Social</p>                           | <p>Compared to non-Hispanic ethnicity, Hispanic ethnicity was associated with increased financial burden. Multiple studies showed excess financial burden among patients of non-White race and Hispanic ethnicity. For example, studies showed that Hispanic patients were more likely to borrow or go into debt than non-Hispanic patients (OR: 1.41, P&lt;0.05). Another study showed increased cost-related medication non-adherence among Hispanic compared to Whites (R,1.61; 95% CI, 1.23–2.10).</p> |
| <p>StGeorge, 2020 [158]</p>                     | <p><b>Study Design:</b><br/>Mixed Methods<br/><br/><b>Data Collection:</b><br/>Survey<br/>Interviews</p>                    | <p>Social cognitive theory, Self-determinati on theory, and family systems theory</p> | <p><b>Sample Size:</b> 46<br/><b>Participant Characteristics:</b><br/>Age Mean (SD): 66.1 (0.9)<br/>Gender:<br/>Male, 0.0%<br/>Female, 100%<br/>Race/ Ethnicity:<br/>Latino/a, 34.8%<br/>Non-Hispanic White, 32.6%<br/>Non-Hispanic Black, 32.6%<br/>Cancer Type(s): Breast, endometrial, ovarian<br/>Survivorship Timing: Not specified<br/>Stratified by Latino/a Subgroups: No</p>                      | <p>Psychological</p>                    | <p>At baseline, Hispanics reported a history of anxiety and depression with greater frequency than non-Hispanic white and non-Hispanic black participants.</p>                                                                                                                                                                                                                                                                                                                                             |
| <p>Sommariva, S 2019 [159]</p>                  | <p><b>Study Design:</b><br/>Qualitative<br/><br/><b>Data Collection:</b><br/>Focus groups, cognitive interviews, survey</p> | <p>Transaction al Model of Stress and Coping (TMSC)</p>                               | <p><b>Sample Size:</b> 114<br/><b>Participant Characteristics:</b><br/>Age Range: &lt;30-75 years<br/>Gender:<br/>Male, 100%<br/>Female, 0%<br/>Race/ Ethnicity:<br/>Latino/a, 100%<br/>Non-Hispanic White, 0%<br/>Non-Hispanic Black, 0%<br/>Asian, 0%<br/>Cancer Type(s): Multiple</p>                                                                                                                   | <p>Psychological, Social, Spiritual</p> | <p>Among Hispanic male cancer survivors, the reaction to a cancer diagnosis included fear of recurrence, while coping strategies included: positive attitude, optimism, humor and gratitude. Social support (including family, emotional support and provider reassurance and encouragement) and faith were also used as coping mechanisms.</p>                                                                                                                                                            |

|                                        |                                                                                               |              |                                                                                                                                                                                                                                                                                                                                                                                                                                   |                                  |                                                                                                                                                                                                                                                                                                                                                                                                                                                            |
|----------------------------------------|-----------------------------------------------------------------------------------------------|--------------|-----------------------------------------------------------------------------------------------------------------------------------------------------------------------------------------------------------------------------------------------------------------------------------------------------------------------------------------------------------------------------------------------------------------------------------|----------------------------------|------------------------------------------------------------------------------------------------------------------------------------------------------------------------------------------------------------------------------------------------------------------------------------------------------------------------------------------------------------------------------------------------------------------------------------------------------------|
|                                        |                                                                                               |              | Survivorship Timing: Not specified<br>Stratified by Latino/a Subgroups: No                                                                                                                                                                                                                                                                                                                                                        |                                  |                                                                                                                                                                                                                                                                                                                                                                                                                                                            |
| Stephens, C., 2010[160]<br><br>(21/22) | <b>Study design:</b><br>Quantitative Cross-Sectional<br><br><b>Data Collection:</b><br>Survey | Not reported | <b>Sample Size:</b> 693<br><b>Participant Characteristics:</b><br>Average Age (SD): 63.4, (12.5)<br>Gender:<br>Male, 44.1%<br>Female, 55.9%<br>Race/ Ethnicity:<br>Latino/a, 100%<br>Non-Hispanic White, 0%<br>Non-Hispanic Black, 0%<br>Asian, 0%<br>Cancer Type(s): Breast, prostate, other<br>Survivorship Timing (Range): 24-120<br>Stratified by Latino/a Subgroups: N                                                       | Social, Spiritual, Psychological | Low acculturated Hispanic cancer survivors had higher life satisfaction than those who are more highly acculturated (being highly acculturated was associated with a five-point drop in life satisfaction (p<0.05)). The effect of acculturation on life satisfaction was mediated by spirituality and social support, both positively associated with life satisfaction. Low acculturated survivors had higher levels of spirituality and social support. |
| Tobin, J., 2017[161]<br><br>(22/22)    | <b>Study design:</b><br>Quantitative Cross-Sectional<br><br><b>Data Collection:</b><br>Survey | Not reported | <b>Sample Size:</b> 235<br><b>Participant Characteristics:</b><br>Average Age (SD): 19.8, (2.8)<br>Gender:<br>Male, 49.4%<br>Female, 50.6%<br>Race/ Ethnicity:<br>Latino/a, 56.2%<br>Non-Hispanic White, 26.3%<br>Non-Hispanic Black, 0%<br>Asian, 0%<br>Other, 17.5%<br>Cancer Type(s): Childhood (all except for Hodgkin Lymphoma)<br>Survivorship Timing (Not Specified): Not Specified<br>Stratified by Latino/a Subgroups: N | Psychological, Spiritual         | White cancer survivors had significantly lower post-traumatic growth (PTG) scores compared to Hispanics (OR: 0.25, 95%CI: 0.13–0.45). Among Hispanics, acculturation was positively associated with PTG; however, religious service attendance was not.                                                                                                                                                                                                    |
| Tobin, J. 2018 [162]                   | <b>Study Design:</b><br>Quantitative<br><br><b>Data Collection:</b><br>Survey                 | Not reported | <b>Sample Size:</b> 131<br><b>Participant Characteristics:</b><br>Age Range: 14-25 years<br>Gender:<br>Male, 52.7%<br>Female, 47.3%<br>Race/ Ethnicity:<br>Latino/a, 100%<br>Non-Hispanic White, 0%<br>Non-Hispanic Black, 0%<br>Asian, 0%<br>Cancer Type(s):<br>Survivorship Timing : 60-132 months<br>Stratified by Latino/a Subgroups: N                                                                                       | Physical, Psychological, Social  | Compared to less assimilated counterparts, more assimilated (or acculturated) Hispanic childhood cancer survivors greater depressive symptoms and lower HRQOL.                                                                                                                                                                                                                                                                                             |

|                                                    |                                                                                                        |                     |                                                                                                                                                                                                                                                                                                                                                                                                                                  |                                                            |                                                                                                                                                                                                                                                                                                                                                                                                                                                                                                                                                                                                                                            |
|----------------------------------------------------|--------------------------------------------------------------------------------------------------------|---------------------|----------------------------------------------------------------------------------------------------------------------------------------------------------------------------------------------------------------------------------------------------------------------------------------------------------------------------------------------------------------------------------------------------------------------------------|------------------------------------------------------------|--------------------------------------------------------------------------------------------------------------------------------------------------------------------------------------------------------------------------------------------------------------------------------------------------------------------------------------------------------------------------------------------------------------------------------------------------------------------------------------------------------------------------------------------------------------------------------------------------------------------------------------------|
| <p>Togawa, K., 2014[163]<br/><br/>(19/22)</p>      | <p><b>Study design:</b><br/>Quantitative Longitudinal</p> <p><b>Data Collection:</b><br/>Survey</p>    | <p>Not reported</p> | <p><b>Sample Size:</b> 666<br/><b>Participant Characteristics:</b><br/>Average Age (SD): 51.5, (7.3)<br/>Gender:<br/>Male, 0%<br/>Female, 100%<br/>Race/ Ethnicity:<br/>Latino/a, 29.0%<br/>Non-Hispanic White, 23.7%<br/>Non-Hispanic Black, 36.3%<br/>Asian, 0%<br/>Cancer Type(s): Breast<br/>Survivorship Timing (Range): 6 (first assessment mean) - 123 (last assessment mean)<br/>Stratified by Latino/a Subgroups: N</p> | <p>Physical</p>                                            | <p>Hispanic/white was not significantly associated with early-onset or late-onset lymphedema. In stratified analyses, Hispanic white women with hypertension were at greater risk for arm lymphedema compared to those who did not have hypertension as well as those who reported chemotherapy as their treatment compared to those who did not.</p>                                                                                                                                                                                                                                                                                      |
| <p>Voiss, P. 2019 [164]</p>                        | <p><b>Study Design:</b><br/>Quantitative</p> <p><b>Data Collection:</b><br/>Survey</p>                 | <p>Not reported</p> | <p><b>Sample Size:</b> 23,222,976 (weighted sample)<br/><b>Participant Characteristics:</b><br/>Age Range: ≥18<br/>Gender:<br/>Male, 45.7%<br/>Female, 54.3%<br/>Race/ Ethnicity:<br/>Latino/a, 6.1%<br/>Non-Hispanic White, 84.4%<br/>Non-Hispanic Black, 5.9%<br/>Asian, 3.1%<br/>Cancer Type(s): Any cancer diagnosis<br/>Survivorship Timing: Not specified<br/>Stratified by Latino/a Subgroups: N</p>                      | <p>Physical</p>                                            | <p>In this study examining the association between sleep problems and mind body medicine (MBM), 49.8% of Hispanics with cancer reported having sleep problems. Ethnicity was not a predictor of MBM use among patients with cancer.</p>                                                                                                                                                                                                                                                                                                                                                                                                    |
| <p>Wang, J., 2007[165]<br/><br/>(N/A)</p>          | <p><b>Study design:</b><br/>Review</p> <p><b>Data Collection:</b><br/>N/A</p>                          | <p>Not reported</p> | <p><b>Sample Size:</b> 14 Articles<br/><b>Cancer Type(s):</b> Multiple</p>                                                                                                                                                                                                                                                                                                                                                       | <p>Physical, Psychological, Social, Spiritual, Overall</p> | <p>Latina breast cancer survivors reported significantly higher degree of concern on psychosocial factors compared to Whites and African-Americans. Hispanic men with prostate cancer reported worse physical functioning than White men, and significantly worse bowel-related issues than their White and African American counterparts. Hispanic and African American men scored higher on the Spirituality index than White men. Hispanic and Black prostate cancer survivors reported worse HRQOL than White men. However, some studies reported no significant differences between racial groups in physical symptoms and HRQOL.</p> |
| <p>Weis Farone, D., 2007[166]<br/><br/>(20/22)</p> | <p><b>Study design:</b><br/>Quantitative Cross-Sectional</p> <p><b>Data Collection:</b><br/>Survey</p> | <p>Not reported</p> | <p><b>Sample Size:</b> 109<br/><b>Participant Characteristics:</b><br/>Average Age (SD): 74.87, (7.7)<br/>Gender:<br/>Male, 0%<br/>Female, 100%<br/>Race/ Ethnicity:<br/>Latino/a, 100%</p>                                                                                                                                                                                                                                      | <p>Physical, Psychological</p>                             | <p>In adjusted models, stronger sense of internal locus control among elderly Latina cancer survivors was significantly associated with improvements in self-rated health, less restricted activity, and fewer experiences of symptoms. A stronger sense of hope was associated with improvements in self-rated health, less restricted activity, and fewer</p>                                                                                                                                                                                                                                                                            |

|                                                  |                                                                                                          |                     |                                                                                                                                                                                                                                                                                                                                                                                                                      |                                                                 |                                                                                                                                                                                                                                                                                                                                                                                                                                                                                                      |
|--------------------------------------------------|----------------------------------------------------------------------------------------------------------|---------------------|----------------------------------------------------------------------------------------------------------------------------------------------------------------------------------------------------------------------------------------------------------------------------------------------------------------------------------------------------------------------------------------------------------------------|-----------------------------------------------------------------|------------------------------------------------------------------------------------------------------------------------------------------------------------------------------------------------------------------------------------------------------------------------------------------------------------------------------------------------------------------------------------------------------------------------------------------------------------------------------------------------------|
|                                                  |                                                                                                          |                     | <p>Non-Hispanic White, 0%<br/> Non-Hispanic Black, 0%<br/> Asian, 0%</p> <p>Cancer Type(s): Breast, uterine/ other<br/> gynecological, other</p> <p>Survivorship Timing (Not Specified): Not Specified</p> <p>Stratified by Latino/a Subgroups: N</p>                                                                                                                                                                |                                                                 | <p>experiences of negative affect. However, locus of control was not significantly associated with negative affect and a stronger sense of hope was not significantly associated with fewer experiences of symptoms.</p>                                                                                                                                                                                                                                                                             |
| <p>Wildes, K. A., 2009[167]<br/><br/>(22/22)</p> | <p><b>Study design:</b><br/> Quantitative Cross-Sectional</p> <p><b>Data Collection:</b><br/> Survey</p> | <p>Not reported</p> | <p><b>Sample Size:</b> 117</p> <p><b>Participant Characteristics:</b><br/> Average Age (SD): 54.72, (10.21)</p> <p>Gender:<br/> Male, 0%<br/> Female, 100%</p> <p>Race/ Ethnicity:<br/> Latino/a, 100%<br/> Non-Hispanic White, 0%<br/> Non-Hispanic Black, 0%<br/> Asian, 0%</p> <p>Cancer Type(s): Breast</p> <p>Survivorship Timing (Not Specified): Not Specified</p> <p>Stratified by Latino/a Subgroups: Y</p> | <p>Physical, Psychological,<br/> Social, Spiritual, Overall</p> | <p>Latina cancer survivors in this sample had higher religiosity/Spirituality scores than members of religious orders such as rabbis and priests, and generally good HRQOL. In multivariate analysis, religiosity/spirituality was a significant predictor of functional well-being (p value=0.041) and relationship with doctor (p value=0.050) but not social well-being. Religiosity/spirituality was not correlated with psychological/emotional well-being or overall HRQOL (FACT-G total).</p> |
| <p>Wildes, K. A., 2011[168]<br/><br/>(22/22)</p> | <p><b>Study design:</b><br/> Quantitative Cross-Sectional</p> <p><b>Data Collection:</b><br/> Survey</p> | <p>Not reported</p> | <p><b>Sample Size:</b> 117</p> <p><b>Participant Characteristics:</b><br/> Average Age (SD): 54.7, (10.2)</p> <p>Gender:<br/> Male, 0%<br/> Female, 100%</p> <p>Race/ Ethnicity:<br/> Latino/a, 100%<br/> Non-Hispanic White, 0%<br/> Non-Hispanic Black, 0%<br/> Asian, 0%</p> <p>Cancer Type(s): Breast</p> <p>Survivorship Timing (Not Specified): Not Specified</p> <p>Stratified by Latino/a Subgroups: N</p>   | <p>Physical, Psychological,<br/> Social, Overall</p>            | <p>Latina cancer survivors generally had adequate HRQOL by overall and HRQOL subdomains. Satisfaction with the doctor was a significant predictor of functional well-being (p=0.012), with higher satisfaction scores corresponding to higher functional well-being.</p>                                                                                                                                                                                                                             |
| <p>Wu, C., 2018[169]<br/><br/>(21/22)</p>        | <p><b>Study design:</b><br/> Quantitative Cross-Sectional</p> <p><b>Data Collection:</b><br/> Survey</p> | <p>Not reported</p> | <p><b>Sample Size:</b> 320</p> <p><b>Participant Characteristics:</b><br/> Average Age (SD): 54.49, (11.49)</p> <p>Gender:<br/> Male, 0%<br/> Female, 100%</p> <p>Race/ Ethnicity:<br/> Latino/a, 72.50%<br/> Non-Hispanic White, 0%<br/> Non-Hispanic Black, 27.50%<br/> Asian, 0%</p> <p>Cancer Type(s): Breast</p> <p>Survivorship Timing (Range): 12-60</p> <p>Stratified by Latino/a Subgroups: N</p>           | <p>Psychological, Overall</p>                                   | <p>Hispanic survivors had significantly more depressive symptoms (p-value=&lt;.01) and greater odds of experiencing psychological difficulties than African Americans (OR: 2.27, 95% CI 1.03–5.00). Association between neighborhood stress with self-rated health, depression and psychological difficulties did not differ between Hispanic and African American cancer survivors.</p>                                                                                                             |

|                                            |                                                                                                     |                                                                                                               |                                                                                                                                                                                                                                                                                                                                                                                                                      |                                                 |                                                                                                                                                                                                                                                                                                                                                                                                                                                                                                                                                                                 |
|--------------------------------------------|-----------------------------------------------------------------------------------------------------|---------------------------------------------------------------------------------------------------------------|----------------------------------------------------------------------------------------------------------------------------------------------------------------------------------------------------------------------------------------------------------------------------------------------------------------------------------------------------------------------------------------------------------------------|-------------------------------------------------|---------------------------------------------------------------------------------------------------------------------------------------------------------------------------------------------------------------------------------------------------------------------------------------------------------------------------------------------------------------------------------------------------------------------------------------------------------------------------------------------------------------------------------------------------------------------------------|
| <p>Yanez, B., 2016[170]</p> <p>(22/22)</p> | <p><b>Study design:</b><br/>Quantitative Longitudinal</p> <p><b>Data Collection:</b><br/>Survey</p> | <p>Reserve Capacity Model; Lifespan Biopsychosocial Model of Cumulative Vulnerability and Minority Health</p> | <p><b>Sample Size:</b> 140 (at the baseline)<br/><b>Participant Characteristics:</b><br/>Average Age (SD): 50.62, (9.65)<br/>Gender:<br/>Male, 0%<br/>Female, 100%<br/>Race/ Ethnicity:<br/>Latino/a, 100%<br/>Non-Hispanic White, 0%<br/>Non-Hispanic Black, 0%<br/>Asian, 0%<br/>Cancer Type(s): Breast<br/>Survivorship Timing at Longitudinal Baseline (Mean): 50.62<br/>Stratified by Latino/a Subgroups: Y</p> | <p>Psychological, Social</p>                    | <p>Latina breast cancer survivors reported elevated levels of depressive symptoms and cancer-specific distress. Greater Latina enculturation (measured by Latino ethnic identity) was significantly associated with greater cancer-specific distress. Further, greater satisfaction with surgical treatment predicted improved depressive symptoms and cancer-specific distress across time.</p>                                                                                                                                                                                |
| <p>Yanez, B., 2011[171]</p> <p>(N/A)</p>   | <p><b>Study design:</b><br/>Review</p> <p><b>Data Collection:</b><br/>N/A</p>                       | <p>Not reported</p>                                                                                           | <p><b>Sample Size:</b> 22 studies<br/><b>Cancer Type(s):</b> Breast</p>                                                                                                                                                                                                                                                                                                                                              | <p>Physical, Psychological, Social, Overall</p> | <p>Latina breast cancer survivors at higher risk for poor mental, Physical and Social functioning HRQOL compared to non-Latinas. The largest disparity was in mental health where Latinas were more likely to report poor mental HRQOL (emotional functioning) than their Black and White counterparts. Latinas reported higher symptom burden in symptoms such as fatigue, pain and lymphedema. One study reported that high-acculturated Latinas but not low reported lower scores on Social wellbeing. Latinas also reported poor overall HRQOL compared to non-Latinas.</p> |
| <p>Yanez, 2020 [172]</p>                   | <p><b>Study Design:</b><br/>Quantitative Longitudinal</p> <p><b>Data Collection:</b><br/>Survey</p> | <p>Supportive Accountability</p>                                                                              | <p><b>Sample Size:</b> 78<br/><b>Participant Characteristics:</b><br/>Age Mean (SD): 52.5 (11.4)<br/>Gender:<br/>Male, 0.0%<br/>Female, 100%<br/>Race/ Ethnicity:<br/>Latino/a, 100%<br/>Non-Hispanic White, 0.0%<br/>Non-Hispanic Black, 0.0%<br/>Cancer Type(s): Breast<br/>Survivorship Timing: 2 to 24 months<br/>Stratified by Latino/a Subgroups: No</p>                                                       | <p>Overall, Physical, Psychological, Social</p> | <p>In this intervention study that randomized Latina breast cancer survivors to two different Smartphone applications aimed at improving HRQOL among Hispanic breast cancer survivors. Participants in both assigned groups experienced decreases in breast cancer symptom burden and breast cancer well-being over time, though the difference between the two groups was not statistically significant.</p>                                                                                                                                                                   |
| <p>Yoo, G. J., 2014[173]</p> <p>(N/A)</p>  | <p><b>Study design:</b><br/>Review</p> <p><b>Data Collection:</b><br/>N/A</p>                       | <p>Coping Theory</p>                                                                                          | <p><b>Sample Size:</b> 33 studies<br/><b>Cancer Type(s):</b> Breast</p>                                                                                                                                                                                                                                                                                                                                              | <p>Psychological, Social, Spiritual</p>         | <p>In this systematic review, authors found several studies identified positive forms of coping such as venting, self-distraction, positive reappraisal, and use of Spiritual beliefs (i.e., prayer) were more common among women of color than White women, as well as negative forms of coping including emotional suppression, wishful thinking, and behavioral disengagement. However, very few of these coping studies included Latina/o respondents. In regards to body image and sexuality, no study included Latina/o respondents.</p>                                  |



|                          |                                                                                        |              |                                                                                                                                                                                                                                                                                                                                                                                  |                                  |                                                                                                                                                                                                                                                                                                                                                    |
|--------------------------|----------------------------------------------------------------------------------------|--------------|----------------------------------------------------------------------------------------------------------------------------------------------------------------------------------------------------------------------------------------------------------------------------------------------------------------------------------------------------------------------------------|----------------------------------|----------------------------------------------------------------------------------------------------------------------------------------------------------------------------------------------------------------------------------------------------------------------------------------------------------------------------------------------------|
| Young, K. 2019 [174]     | <p><b>Study Design:</b><br/>Quantitative</p> <p><b>Data Collection:</b><br/>Survey</p> | Not reported | <p><b>Sample Size:</b> 747</p> <p><b>Participant Characteristics:</b><br/>Age Range: 18-40<br/>Gender:<br/>Male, 0%<br/>Female, 100%<br/>Race/ Ethnicity:<br/>Latino/a, 24.5%<br/>Non-Hispanic White, 72.8%<br/>Non-Hispanic Black, 2.1%<br/>Asian, 7.0%<br/>Cancer Type(s): Multiple<br/>Survivorship Timing: 92.4 months<br/>Stratified by Latino/a Subgroups: N</p>           | Psychological                    | Hispanic AYA cancer survivors had similar levels of reproductive concerns as non-Hispanic AYAs (ethnicity was not a predictor of moderate to high overall reproductive concerns)                                                                                                                                                                   |
| Yu, Q. 2018 [175]        | <p><b>Study Design:</b><br/>Quantitative</p> <p><b>Data Collection:</b><br/>Survey</p> | Not reported | <p><b>Sample Size:</b> 2827</p> <p><b>Participant Characteristics:</b><br/>Age Range: 21-84<br/>Gender: Not specified<br/>Male, %<br/>Female, %<br/>Race/ Ethnicity:<br/>Latino/a, 23.6%<br/>Non-Hispanic White, 76.4%<br/>Non-Hispanic Black, 0%<br/>Asian, 0%<br/>Cancer Type(s): Multiple<br/>Survivorship Timing : Not specified<br/>Stratified by Latino/a Subgroups: N</p> | Psychological, Social, Spiritual | Compared to Hispanic Whites, non-Hispanic Whites have lower anxiety and depression on average. Lower social support among Hispanic Whites helped explained some of the disparity between Hispanic Whites and non-Hispanic Whites. A higher level of spiritual support was a protective factor against anxiety for Hispanic Whites                  |
| Zhou, Eric S. 2018 [176] | <p><b>Study Design:</b><br/>Quantitative</p> <p><b>Data Collection:</b><br/>Survey</p> | Not reported | <p><b>Sample Size:</b> 5702</p> <p><b>Participant Characteristics:</b><br/>Age Range: ≥18<br/>Gender:<br/>Male, 31.2%<br/>Female, 66.8%<br/>Race/ Ethnicity:<br/>Latino/a, 20.7%<br/>Non-Hispanic White, 66.4%<br/>Non-Hispanic Black, 4.8%<br/>Asian, 15.0%<br/>Cancer Type(s): Multiple<br/>Survivorship Timing: Not specified<br/>Stratified by Latino/a Subgroups: N</p>     | Physical                         | In the overall sample, Hispanic cancer patients were more likely to report sleep problems prior to initiating cancer treatment, compared to non-Hispanics (OR=1.56, p<0.001). When broken down by cancer, Hispanics diagnosed with hematological, gynecologic and breast cancer were more likely than non-Hispanics to report high sleep problems. |

## REFERENCES

1. Aguado Loi CX, Baldwin JA, McDermott RJ, *et al.* Risk factors associated with increased depressive symptoms among Latinas diagnosed with breast cancer within 5 years of survivorship. *Psychooncology* 2013;22(12):2779-88.
2. Armbruster SD, Song J, Gatus L, *et al.* Endometrial cancer survivors' sleep patterns before and after a physical activity intervention: A retrospective cohort analysis. *Gynecol Oncol* 2018;149(1):133-139.
3. Arpawong TE, Oland A, Milam JE, *et al.* Post-traumatic growth among an ethnically diverse sample of adolescent and young adult cancer survivors. *Psychooncology* 2013;22(10):2235-44.
4. Ashing K, Rosales M. A telephonic-based trial to reduce depressive symptoms among Latina breast cancer survivors. *Psychooncology* 2014;23(5):507-15.
5. Ashing KT, George M, Jones V, *et al.* Health-related quality of life and care satisfaction outcomes: Informing psychosocial oncology care among Latina and African-American young breast cancer survivors. *Psychooncology* 2018;27(4):1213-1220.
6. Ashing-Giwa K, Rosales M, Lai L, *et al.* Depressive symptomatology among Latina breast cancer survivors. *Psychooncology* 2013;22(4):845-53.
7. Ashing-Giwa KT. Enhancing physical well-being and overall quality of life among underserved Latina-American cervical cancer survivors: feasibility study. *J Cancer Surviv* 2008;2(3):215-23.
8. Ashing-Giwa KT, Kagawa-Singer M, Padilla GV, *et al.* The impact of cervical cancer and dysplasia: a qualitative, multiethnic study. *Psychooncology* 2004;13(10):709-28.
9. Ashing-Giwa KT, Lim JW. Exploring the association between functional strain and emotional well-being among a population-based sample of breast cancer survivors. *Psychooncology* 2010;19(2):150-9.
10. Ashing-Giwa KT, Lim JW. Predicting physical quality of life among a multiethnic sample of breast cancer survivors. *Qual Life Res* 2010;19(6):789-802.
11. Ashing-Giwa KT, Lim JW. Examining emotional outcomes among a multiethnic cohort of breast cancer survivors. *Oncol Nurs Forum* 2011;38(3):279-88.
12. Ashing-Giwa KT, Lim JW. Health-related quality of life outcomes among cervical cancer survivors: examining ethnic and linguistic differences. *Cancer Epidemiol* 2011;35(2):194-201.
13. Ashing-Giwa KT, Lim JW, Gonzalez P. Exploring the relationship between physical well-being and healthy lifestyle changes among European- and Latina-American breast and cervical cancer survivors. *Psychooncology* 2010;19(11):1161-70.
14. Ashing-Giwa KT, Padilla GV, Bohorquez DE, *et al.* Understanding the breast cancer experience of Latina women. *J Psychosoc Oncol* 2006;24(3):19-52.
15. Ashing-Giwa KT, Padilla GV, Bohorquez DE, *et al.* Survivorship: a qualitative investigation of Latinas diagnosed with cervical cancer. *J Psychosoc Oncol* 2006;24(4):53-88.
16. Ashing-Giwa KT, Padilla G, Tejero J, *et al.* Understanding the breast cancer experience of women: a qualitative study of African American, Asian American, Latina and Caucasian cancer survivors. *Psychooncology* 2004;13(6):408-28.
17. Ashing-Giwa KT, Tejero JS, Kim J, *et al.* Examining predictive models of HRQOL in a population-based, multiethnic sample of women with breast carcinoma. *Qual Life Res* 2007;16(3):413-28.
18. Ashing-Giwa KT, Tejero JS, Kim J, *et al.* Cervical cancer survivorship in a population based sample. *Gynecol Oncol* 2009;112(2):358-64.
19. Ayala-Feliciano M, Pons-Valerio JJ, Pons-Madera J, *et al.* The Relationship between Visuospatial Memory and Coping Strategies in Breast Cancer Survivors. *Breast Cancer (Auckl)* 2011;5:117-30.

20. Aziz NM, Rowland JH. Cancer survivorship research among ethnic minority and medically underserved groups. *Oncol Nurs Forum* 2002;29(5):789-801.
21. Badger TA, Segrin C, Hepworth JT, *et al.* Telephone-delivered health education and interpersonal counseling improve quality of life for Latinas with breast cancer and their supportive partners. *Psychooncology* 2013;22(5):1035-42.
22. Badger TA, Segrin C, Sikorskii A, *et al.* Randomized controlled trial of supportive care interventions to manage psychological distress and symptoms in Latinas with breast cancer and their informal caregivers. *Psychology & health* 2020;35(1):87-106.
23. Banas JR, Victorson D, Gutierrez S, *et al.* Developing a Peer-to-Peer mHealth Application to Connect Hispanic Cancer Patients. *J Cancer Educ* 2017;32(1):158-165.
24. Barden SM, Gutierrez D, Gonzalez J, *et al.* Healing faith: A qualitative exploration of Latina breast cancer survivors. *Counseling and Values* 2016;61(2):142-158.
25. Bellizzi KM, Aziz NM, Rowland JH, *et al.* Double jeopardy? Age, race, and HRQOL in older adults with cancer. *Journal of Cancer Epidemiology* 2012; 10.1155/2012/478642.
26. Bevilacqua LA, Dulak D, Schofield E, *et al.* Prevalence and predictors of depression, pain, and fatigue in older- versus younger-adult cancer survivors. *Psychooncology* 2018;27(3):900-907.
27. Black DS, Cole SW, Christodoulou G, *et al.* Genomic mechanisms of fatigue in survivors of colorectal cancer. *Cancer* 2018;124(12):2637-2644.
28. Blinder VS, Griggs JJ. Health disparities and the cancer survivor. *Seminars in Oncology* 2013;40(6):796-803.
29. Blinder VS, Murphy MM, Vahdat LT, *et al.* Employment after a breast cancer diagnosis: a qualitative study of ethnically diverse urban women. *J Community Health* 2012;37(4):763-72.
30. Blinder VS, Patil S, Thind A, *et al.* Return to work in low-income Latina and non-Latina white breast cancer survivors: a 3-year longitudinal study. *Cancer* 2012;118(6):1664-74.
31. Blinder V, Eberle C, Patil S, *et al.* Women With Breast Cancer Who Work For Accommodating Employers More Likely To Retain Jobs After Treatment. *Health Aff (Millwood)* 2017;36(2):274-281.
32. Blinder V, Patil S, Eberle C, *et al.* Early predictors of not returning to work in low-income breast cancer survivors: a 5-year longitudinal study. *Breast Cancer Res Treat* 2013;140(2):407-16.
33. Bloom JR, Stewart SL, Napoles AM, *et al.* Quality of life of Latina and Euro-American women with ductal carcinoma in situ. *Psychooncology* 2013;22(5):1008-16.
34. Borryo EA, Scott KL, Drennen A, *et al.* Treatment challenges and support needs of underserved Hispanic patients diagnosed with lung cancer and head-and-neck cancer. *Journal of Psychosocial Oncology* 2020:1-14.
35. Bowen DJ, Alfano CM, McGregor BA, *et al.* Possible socioeconomic and ethnic disparities in quality of life in a cohort of breast cancer survivors. *Breast Cancer Res Treat* 2007;106(1):85-95.
36. Brisbois MD. An interpretive description of chemotherapy-induced premature menopause among Latinas with breast cancer. *Oncol Nurs Forum* 2014;41(5):E282-9.
37. Buki LP, Garces DM, Hinestrosa MC, *et al.* Latina breast cancer survivors' lived experiences: diagnosis, treatment, and beyond. *Cultur Divers Ethnic Minor Psychol* 2008;14(2):163-7.
38. Buki LP, Reich M, Lehardy EN. "Our organs have a purpose": body image acceptance in Latina breast cancer survivors. *Psychooncology* 2016;25(11):1337-1342.
39. Burg MA, Adorno G, Lopez ED, *et al.* Current unmet needs of cancer survivors: analysis of open-ended responses to the American Cancer Society Study of Cancer Survivors II. *Cancer* 2015;121(4):623-30.
40. Buscemi J, Buitrago D, Iacobelli F, *et al.* Feasibility of a Smartphone-based pilot intervention for Hispanic breast cancer survivors: a brief report. *Translational behavioral medicine* 2019;9(4):638-645.
41. Campesino M. Exploring perceptions of cancer care delivery among older Mexican American adults. *Oncol Nurs Forum* 2009;36(4):413-20.

42. Canada AL, Fitchett G, Murphy PE, *et al.* Racial/ethnic differences in spiritual well-being among cancer survivors. *J Behav Med* 2013;36(5):441-53.
43. Carrion IV, Nedjat-Haiem F, Macip-Billbe M, *et al.* "I Told Myself to Stay Positive" Perceptions of Coping Among Latinos With a Cancer Diagnosis Living in the United States. *Am J Hosp Palliat Care* 2017;34(3):233-240.
44. Carver CS, Smith RG, Petronis VM, *et al.* Quality of life among long-term survivors of breast cancer: Different types of antecedents predict different classes of outcomes. *Psychooncology* 2006;15(9):749-58.
45. Casillas JN, Zebrack BJ, Zeltzer LK. Health-related quality of life for Latino survivors of childhood cancer. *J Psychosoc Oncol* 2006;24(3):125-45.
46. Casillas J, Kahn KL, Doose M, *et al.* Transitioning childhood cancer survivors to adult-centered healthcare: insights from parents, adolescent, and young adult survivors. *Psychooncology* 2010;19(9):982-90.
47. Castellino SM, Casillas J, Hudson MM, *et al.* Minority adult survivors of childhood cancer: a comparison of long-term outcomes, health care utilization, and health-related behaviors from the childhood cancer survivor study. *J Clin Oncol* 2005;23(27):6499-507.
48. Castillo A, Mendiola J, Tiemensma J. Emotions and Coping Strategies During Breast Cancer in Latina Women: A Focus Group Study. *Hisp Health Care Int* 2019;17(3):96-102.
49. Ceballos RM, Molina Y, Malen RC, *et al.* Design, development, and feasibility of a spanish-language cancer survivor support group. *Support Care Cancer* 2015;23(7):2145-55.
50. Chebli P, Lemus J, Avila C, *et al.* Multilevel determinants of financial toxicity in breast cancer care: perspectives of healthcare professionals and Latina survivors. *Support Care Cancer* 2019; 10.1007/s00520-019-05119-y.
51. Christie KM, Meyerowitz BE, Maly RC. Depression and sexual adjustment following breast cancer in low-income Hispanic and non-Hispanic White women. *Psychooncology* 2010;19(10):1069-77.
52. Clarke TC, Christ SL, Soler-Vila H, *et al.* Working with cancer: health and employment among cancer survivors. *Ann Epidemiol* 2015;25(11):832-8.
53. Clauser SB, Arora NK, Bellizzi KM, *et al.* Disparities in HRQOL of cancer survivors and non-cancer managed care enrollees. *Health Care Financ Rev* 2008;29(4):23-40.
54. Connor AE, Baumgartner RN, Pinkston CM, *et al.* Obesity, ethnicity, and quality of life among breast cancer survivors and women without breast cancer: the long-term quality of life follow-up study. *Cancer Causes Control* 2016;27(1):115-24.
55. Costas-Muniz R, Hunter-Hernandez M, Garduno-Ortega O, *et al.* Ethnic differences in psychosocial service use among non-Latina white and Latina breast cancer survivors. *J Psychosoc Oncol* 2017;35(4):424-437.
56. Crane TE, Badger TA, Sikorskii A, *et al.* Trajectories of Depression and Anxiety in Latina Breast Cancer Survivors. *Oncol Nurs Forum* 2019;46(2):217-227.
57. Crookes DM, Shelton RC, Tehranifar P, *et al.* Social networks and social support for healthy eating among Latina breast cancer survivors: implications for social and behavioral interventions. *J Cancer Surviv* 2016;10(2):291-301.
58. Das N, Baumgartner RN, Riley EC, *et al.* Treatment-related risk factors for arm lymphedema among long-term breast cancer survivors. *J Cancer Surviv* 2015;9(3):422-30.
59. Dirksen SR, Erickson JR. Well-being in Hispanic and non-Hispanic white survivors of breast cancer. *Oncol Nurs Forum* 2002;29(5):820-6.
60. Dyer KE. "Surviving is not the same as living": cancer and Sobrevivencia in Puerto Rico. *Soc Sci Med* 2015;132:20-9.
61. Elimimian E, Elson L, Bilani N, *et al.* Long-Term Effect of a Nonrandomized Psychosocial Mindfulness-Based Intervention in Hispanic/Latina Breast Cancer Survivors. *Integr Cancer Ther* 2020;19:1534735419890682.
62. Escalera C, Santoyo-Olsson J, Stewart AL, *et al.* Social support as a moderator in the relationship between intrusive thoughts and anxiety among Spanish-speaking Latinas with breast cancer. *Psychooncology* 2019;28(9):1819-1828.
63. Eversley R, Estrin D, Dibble S, *et al.* Post-treatment symptoms among ethnic minority breast cancer survivors. *Oncol Nurs Forum* 2005;32(2):250-6.

64. Fatone AM, Moadel AB, Foley FW, *et al.* Urban voices: the quality-of-life experience among women of color with breast cancer. *Palliat Support Care* 2007;5(2):115-25.
65. Foley KL, Farmer DF, Petronis VM, *et al.* A qualitative exploration of the cancer experience among long-term survivors: Comparisons by cancer type, ethnicity, gender, and age. *Psychooncology* 2006;15(3):248-258.
66. Fu OS, Crew KD, Jacobson JS, *et al.* Ethnicity and persistent symptom burden in breast cancer survivors. *J Cancer Surviv* 2009;3(4):241-50.
67. Galvan N, Buki LP, Garces DM. Suddenly, a carriage appears: social support needs of Latina breast cancer survivors. *J Psychosoc Oncol* 2009;27(3):361-82.
68. Garcia-Jimenez M, Santoyo-Olsson J, Ortiz C, *et al.* Acculturation, inner peace, cancer self-efficacy, and self-rated health among Latina breast cancer survivors. *J Health Care Poor Underserved* 2014;25(4):1586-602.
69. Giedzinska AS, Meyerowitz BE, Ganz PA, *et al.* Health-related quality of life in a multiethnic sample of breast cancer survivors. *Ann Behav Med* 2004;28(1):39-51.
70. Goldfarb M, Casillas J. Thyroid Cancer-Specific Quality of Life and Health-Related Quality of Life in Young Adult Thyroid Cancer Survivors. *Thyroid* 2016;26(7):923-932.
71. Gonzales FA, Hurtado-de-Mendoza A, Santoyo-Olsson J, *et al.* Do coping strategies mediate the effects of emotional support on emotional well-being among Spanish-speaking Latina breast cancer survivors? *Psychooncology* 2016;25(11):1286-1292.
72. Gonzalez P, Nunez A, Wang-Letzkus M, *et al.* Coping with breast cancer: Reflections from Chinese American, Korean American, and Mexican American women. *Health Psychol* 2016;35(1):19-28.
73. Graves KD, Jensen RE, Canar J, *et al.* Through the lens of culture: quality of life among Latina breast cancer survivors. *Breast Cancer Res Treat* 2012;136(2):603-13.
74. Haddy TB, Mosher RB, Reaman GH. Late effects in long-term survivors after treatment for childhood acute leukemia. *Clin Pediatr (Phila)* 2009;48(6):601-8.
75. Holden AE, Ramirez AG, Gallion K. Depressive symptoms in Latina breast cancer survivors: a barrier to cancer screening. *Health Psychol* 2014;33(3):242-8.
76. Hughes DC, Leung P, Naus MJ. Using single-system analyses to assess the effectiveness of an exercise intervention on quality of life for Hispanic breast cancer survivors: a pilot study. *Soc Work Health Care* 2008;47(1):73-91.
77. Jagsi R, Pottow JA, Griffith KA, *et al.* Long-term financial burden of breast cancer: experiences of a diverse cohort of survivors identified through population-based registries. *J Clin Oncol* 2014;32(12):1269-76.
78. Janz NK, Hawley ST, Mujahid MS, *et al.* Correlates of worry about recurrence in a multiethnic population-based sample of women with breast cancer. *Cancer* 2011;117(9):1827-1836.
79. Janz NK, Li Y, Beesley LJ, *et al.* Worry about recurrence in a multi-ethnic population of breast cancer survivors and their partners. *Support Care Cancer* 2016;24(11):4669-78.
80. Janz NK, Mujahid MS, Hawley ST, *et al.* Racial/ethnic differences in quality of life after diagnosis of breast cancer. *J Cancer Surviv* 2009;3(4):212-22.
81. Janz NK, Mujahid MS, Hawley ST, *et al.* Racial/ethnic differences in adequacy of information and support for women with breast cancer. *Cancer* 2008;113(5):1058-67.
82. Jones BL, Volker DL, Vinajeras Y, *et al.* The meaning of surviving cancer for Latino adolescents and emerging young adults. *Cancer Nurs* 2010;33(1):74-81.
83. Juarez G, Hurria A, Uman G, *et al.* Impact of a bilingual education intervention on the quality of life of Latina breast cancer survivors. *Oncol Nurs Forum* 2013;40(1):E50-60.
84. Kent EE, Alfano CM, Smith AW, *et al.* The roles of support seeking and race/ethnicity in posttraumatic growth among breast cancer survivors. *J Psychosoc Oncol* 2013;31(4):393-412.

85. Kent EE, Mitchell SA, Oakley-Girvan I, *et al.* The importance of symptom surveillance during follow-up care of leukemia, bladder, and colorectal cancer survivors. *Support Care Cancer* 2014;22(1):163-72.
86. Knobf MT, Ferrucci LM, Cartmel B, *et al.* Needs assessment of cancer survivors in Connecticut. *J Cancer Surviv* 2012;6(1):1-10.
87. Koch L, Jansen L, Brenner H, *et al.* Fear of recurrence and disease progression in long-term ( $\geq 5$  years) cancer survivors--a systematic review of quantitative studies. *Psychooncology* 2013;22(1):1-11.
88. Lee E, Takita C, Wright JL, *et al.* Characterization of risk factors for adjuvant radiotherapy-associated pain in a tri-racial/ethnic breast cancer population. *Pain* 2016;157(5):1122-31.
89. Krok-Schoen JL, Fernandez K, Unzeitig GW, *et al.* Hispanic breast cancer patients' symptom experience and patient-physician communication during chemotherapy. *Support Care Cancer* 2019;27(2):697-704.
90. Levine EG, Yoo G, Aviv C, *et al.* Ethnicity and spirituality in breast cancer survivors. *J Cancer Surviv* 2007;1(3):212-25.
91. Lim JW, Gonzalez P, Wang-Letzkus MF, *et al.* Understanding the cultural health belief model influencing health behaviors and health-related quality of life between Latina and Asian-American breast cancer survivors. *Support Care Cancer* 2009;17(9):1137-47.
92. Livaudais JC, Thompson B, Godina R, *et al.* A qualitative investigation of cancer survivorship experiences among rural Hispanics. *J Psychosoc Oncol* 2010;28(4):361-80.
93. Lockhart JS, Oberleitner MG, Nolfi DA. The Hispanic/Latino Immigrant Cancer Survivor Experience in the United States: A Scoping Review. *Annual review of nursing research* 2018;37(1):119-160.
94. Lopez-Class M, Gomez-Duarte J, Graves K, *et al.* A contextual approach to understanding breast cancer survivorship among Latinas. *Psychooncology* 2012;21(2):115-24.
95. Lopez-Class M, Perret-Gentil M, Kreling B, *et al.* Quality of life among immigrant Latina breast cancer survivors: realities of culture and enhancing cancer care. *J Cancer Educ* 2011;26(4):724-33.
96. Luckett T, Goldstein D, Butow PN, *et al.* Psychological morbidity and quality of life of ethnic minority patients with cancer: a systematic review and meta-analysis. *Lancet Oncol* 2011;12(13):1240-8.
97. Maly RC, Liu Y, Liang LJ, *et al.* Quality of life over 5 years after a breast cancer diagnosis among low-income women: effects of race/ethnicity and patient-physician communication. *Cancer* 2014;121(6):916-26.
98. Martinez Tyson DD, Jacobsen P, Meade CD. Understanding the Stress Management Needs and Preferences of Latinas Undergoing Chemotherapy. *J Cancer Educ* 2016;31(4):633-639.
99. Martinez Tyson D, Medina-Ramirez P, Vazquez-Otero C, *et al.* Initial evaluation of the validity and reliability of the culturally adapted Spanish CaSUN (S-CaSUN). *J Cancer Surviv* 2018;12(4):509-518.
100. McNulty J, Kim W, Thurston T, *et al.* Interventions to Improve Quality of Life, Well-Being, and Care in Latino Cancer Survivors: A Systematic Literature Review. *Oncol Nurs Forum* 2016;43(3):374-84.
101. Medeiros EA, Castaneda SF, Gonzalez P, *et al.* Health-Related Quality of Life Among Cancer Survivors Attending Support Groups. *J Cancer Educ* 2015;30(3):421-7.
102. Meneses K, Gisiger-Camata S, Benz R, *et al.* Telehealth intervention for Latina breast cancer survivors: A pilot. *Womens Health (Lond)* 2018;14:1745506518778721.
103. Meeske KA, Patel SK, Palmer SN, *et al.* Factors associated with health-related quality of life in pediatric cancer survivors. *Pediatr Blood Cancer* 2007;49(3):298-305.
104. Miller AM, Ashing KT, Modeste NN, *et al.* Contextual factors influencing health-related quality of life in African American and Latina breast cancer survivors. *J Cancer Surviv* 2015;9(3):441-9.
105. Molina Y, Thompson B, Espinoza N, *et al.* Breast cancer interventions serving US-based Latinas: current approaches and directions. *Womens Health (Lond)* 2013;9(4):335-48; quiz 349.
106. Moreno PI, Ramirez AG, San Miguel-Majors SL, *et al.* Satisfaction with cancer care, self-efficacy, and health-related quality of life in Latino cancer survivors. *Cancer* 2018;124(8):1770-1779.

107. Moreno PI, Ramirez AG, San Miguel-Majors SL, *et al.* Unmet supportive care needs in Hispanic/Latino cancer survivors: prevalence and associations with patient-provider communication, satisfaction with cancer care, and symptom burden. *Support Care Cancer* 2019;27(4):1383-1394.
108. Morrow PK, Broxson AC, Munsell MF, *et al.* Effect of age and race on quality of life in young breast cancer survivors. *Clin Breast Cancer* 2014;14(2):e21-31.
109. Mujahid MS, Janz NK, Hawley ST, *et al.* The impact of sociodemographic, treatment, and work support on missed work after breast cancer diagnosis. *Breast Cancer Res Treat* 2010;119(1):213-20.
110. Mujahid MS, Janz NK, Hawley ST, *et al.* Racial/ethnic differences in job loss for women with breast cancer. *Journal of* 2011;5(1):102-111.
111. Munoz AR, Kaiser K, Yanez B, *et al.* Cancer experiences and health-related quality of life among racial and ethnic minority survivors of young adult cancer: a mixed methods study. *Support Care Cancer* 2016;24(12):4861-4870.
112. Munoz AR, Salsman JM, Stein KD, *et al.* Reference values of the Functional Assessment of Chronic Illness Therapy-Spiritual Well-Being: a report from the American Cancer Society's studies of cancer survivors. *Cancer* 2015;121(11):1838-44.
113. Napoles AM, Ortiz C, O'Brien H, *et al.* Coping resources and self-rated health among Latina breast cancer survivors. *Oncol Nurs Forum* 2011;38(5):523-31.
114. Napoles AM, Ortiz C, Santoyo-Olsson J, *et al.* Post-Treatment Survivorship Care Needs of Spanish-speaking Latinas with Breast Cancer. *J Community Support Oncol* 2017;15(1):20-27.
115. Napoles AM, Santoyo-Olsson J, Chacon L, *et al.* Feasibility of a Mobile Phone App and Telephone Coaching Survivorship Care Planning Program Among Spanish-Speaking Breast Cancer Survivors. *JMIR Cancer* 2019;5(2):e13543.
116. Ochoa CY, Haardorfer R, Escoffery C, *et al.* Examining the role of social support and spirituality on the general health perceptions of Hispanic cancer survivors. *Psychooncology* 2018;27(9):2189-2197.
117. Olagunju TO, Liu Y, Liang LJ, *et al.* Disparities in the survivorship experience among Latina survivors of breast cancer. *Cancer* 2018;124(11):2373-2380.
118. Orom H, Biddle C, Underwood W, 3rd, *et al.* Racial/Ethnic and Socioeconomic Disparities in Prostate Cancer Survivors' Prostate-Specific Quality of Life. *Urology* 2017; 10.1016/j.urology.2017.08.014.
119. Osann K, Hsieh S, Nelson EL, *et al.* Factors associated with poor quality of life among cervical cancer survivors: implications for clinical care and clinical trials. *Gynecol Oncol* 2014;135(2):266-72.
120. Owens B, Jackson M, Berndt A. Complementary therapy used by Hispanic women during treatment for breast cancer. *Journal of Holistic Nursing* 2009;27(3):167-176.
121. Pakiz B, Ganz PA, Sedjo RL, *et al.* Correlates of quality of life in overweight or obese breast cancer survivors at enrollment into a weight loss trial. *Psychooncology* 2016;25(2):142-9.
122. Pandya DM, Patel S, Ketchum NS, *et al.* A comparison of races and leukemia subtypes among patients in different cancer survivorship phases. *Clin Lymphoma Myeloma Leuk* 2011;11 Suppl 1:S114-8.
123. Papaleontiou M, Reyes-Gastelum D, Gay BL, *et al.* Worry in thyroid cancer survivors with a favorable prognosis. *Thyroid* 2019;29(8):1080-1088.
124. Park J, Wehrlen L, Mitchell SA, *et al.* Fatigue predicts impaired social adjustment in survivors of allogeneic hematopoietic cell transplantation (HCT). *Support Care Cancer* 2019;27(4):1355-1363.
125. Patel SK, Lo TT, Dennis JM, *et al.* Neurocognitive and behavioral outcomes in Latino childhood cancer survivors. *Pediatr Blood Cancer* 2013;60(10):1696-702.
126. Paxton RJ, Phillips KL, Jones LA, *et al.* Associations among physical activity, body mass index, and health-related quality of life by race/ethnicity in a diverse sample of breast cancer survivors. *Cancer* 2012;118(16):4024-31.
127. Pfaendler KS, Wenzel L, Mechanic MB, *et al.* Cervical cancer survivorship: long-term quality of life and social support. *Clin Ther* 2015;37(1):39-48.

128. Phillips F, Jones BL. Understanding the lived experience of Latino adolescent and young adult survivors of childhood cancer. *J Cancer Surviv* 2014;8(1):39-48.
129. Pinheiro LC, Wheeler SB, Chen RC, *et al.* The effects of cancer and racial disparities in health-related quality of life among older Americans: a case-control, population-based study. *Cancer* 2015;121(8):1312-20.
130. Pisu M, Kenzik KM, Oster RA, *et al.* Economic hardship of minority and non-minority cancer survivors 1 year after diagnosis: another long-term effect of cancer? *Cancer* 2015;121(8):1257-64.
131. Poghosyan H, Darwish SA, Kim SS, *et al.* The association between social support and smoking status in cancer survivors with frequent and infrequent mental distress: results from 10 US states, 2010. *J Cancer Surviv* 2016;10(6):1078-1088.
132. Polek C, Hardie T, Deatrck JA, *et al.* Breast Cancer Survivorship Experiences of Urban Hispanic Women. *J Cancer Educ* 2019; 10.1007/s13187-019-01543-0.
133. Prince P, Mitchell SA, Wehrle L, *et al.* Spiritual Well-Being in Hispanic and Non-Hispanic Survivors of Allogeneic Hematopoietic Stem Cell Transplantation. *J Psychosoc Oncol* 2015;33(6):635-54.
134. Raghobar KP, Orobio J, Ris MD, *et al.* Adaptive functioning in pediatric brain tumor survivors: An examination of ethnicity and socioeconomic status. *Pediatr Blood Cancer* 2019;66(9):e27800.
135. Ramirez AG, Choi BY, Munoz E, *et al.* Assessing the effect of patient navigator assistance for psychosocial support services on health-related quality of life in a randomized clinical trial in Latino breast, prostate, and colorectal cancer survivors. *Cancer* 2019; 10.1002/cncr.32626.
136. Reyes ME, Ye Y, Zhou Y, *et al.* Predictors of health-related quality of life and association with survival may identify colorectal cancer patients at high risk of poor prognosis. *Quality of Life Research* 2017;26(2):319-330.
137. Ritt-Olson A, Miller K, Baezconde-Garbanati L, *et al.* Depressive symptoms and quality of life among adolescent and young adult cancer survivors: Impact of gender and Latino culture. *Journal of adolescent and young adult oncology* 2018;7(3):384-388.
138. Ross LE, Hall IJ, Fairley TL, *et al.* Prayer and self-reported health among cancer survivors in the United States, National Health Interview Survey, 2002. *J Altern Complement Med* 2008;14(8):931-8.
139. Rossi A, Garber CE, Kaur G, *et al.* Physical activity-related differences in body mass index and patient-reported quality of life in socioculturally diverse endometrial cancer survivors. *Support Care Cancer* 2017;25(7):2169-2177.
140. Rush CL, Lobo T, Serrano A, *et al.* Complementary and Alternative Medicine Use and Latina Breast Cancer Survivors' Symptoms and Functioning. *Healthcare (Basel)* 2016;4(4).
141. Sanchez-Birkhead AC, Carbajal-Salisbury S, Larreta JA, *et al.* A Community-Based Approach to Assessing the Physical, Emotional, and Health Status of Hispanic Breast Cancer Survivors. *Hisp Health Care Int* 2017;15(4):166-172.
142. Santee EJ, King KA, Vidourek RA, *et al.* Health Care Access and Health Behavior Quality of Life among Hispanic/Latino-American Cancer Survivors. *Applied Research in Quality of Life* 2018:1-14.
143. Santoyo-Olsson J, Stewart AL, Samayoa C, *et al.* Translating a stress management intervention for rural Latina breast cancer survivors: The Nuevo Amanecer-II. *PLoS one* 2019;14(10).
144. Sammarco A, Konecny LM. Quality of life, social support, and uncertainty among Latina breast cancer survivors. *Oncol Nurs Forum* 2008;35(5):844-9.
145. Sammarco A, Konecny LM. Quality of life, social support, and uncertainty among Latina and Caucasian breast cancer survivors: a comparative study. *Oncol Nurs Forum* 2010;37(1):93-9.
146. Segrin C, Badger TA. Interdependent psychological distress between Latinas with breast cancer and their supportive partners. *Journal of Latina/o Psychology* 2013;1(1):21-34.
147. Segrin C, Badger TA, Sikorskii A. A dyadic analysis of loneliness and health-related quality of life in Latinas with breast cancer and their informal caregivers. *Journal of psychosocial oncology* 2019;37(2):213-227.
148. Segrin C, Badger TA, Sikorskii A, *et al.* A dyadic analysis of stress processes in Latinas with breast cancer and their family caregivers. *Psychooncology* 2018;27(3):838-846.



149. Segrin C, Badger TA, Sikorskii A, *et al.* Longitudinal dyadic interdependence in psychological distress among Latinas with breast cancer and their caregivers. *Support Care Cancer* 2019; 10.1007/s00520-019-05121-4.
150. Séguin Leclair C, Lebel S, Westmaas JL. The relationship between fear of cancer recurrence and health behaviors: A nationwide longitudinal study of cancer survivors. *Health Psychology* 2019;38(7):596.
151. Shi Z, Richardson JM, Aycinena AC, *et al.* Psychosocial mediators of dietary change among Hispanic/Latina breast cancer survivors in a culturally tailored dietary intervention. *Psychooncology* 2018;27(9):2220-2228.
152. Sleight AG. Occupational Engagement in Low-Income Latina Breast Cancer Survivors. *Am J Occup Ther* 2017;71(2):7102100020p1-7102100020p8.
153. Sleight AG, Lyons KD, Vigen C, *et al.* Supportive care priorities of low-income Latina breast cancer survivors. *Supportive Care in Cancer* 2018;26(11):3851-3859.
154. Sleight AG, Lyons KD, Vigen C, *et al.* The association of health-related quality of life with unmet supportive care needs and sociodemographic factors in low-income Latina breast cancer survivors: a single-Centre pilot study. *Disability and rehabilitation* 2019;41(26):3151-3156.
155. Smith AB, Bashore L. The effect of clinic-based health promotion education on perceived health status and health promotion behaviors of adolescent and young adult cancer survivors. *Journal of Pediatric Oncology Nursing* 2006;23(6):326-334.
156. Smith AW, Alfano CM, Reeve BB, *et al.* Race/ethnicity, physical activity, and quality of life in breast cancer survivors. *Cancer Epidemiol Biomarkers Prev* 2009;18(2):656-63.
157. Smith GL, Lopez-Olivo MA, Advani PG, *et al.* Financial burdens of cancer treatment: A systematic review of risk factors and outcomes. *JNCCN Journal of the National Comprehensive Cancer Network* 2019;17(10):1184-1192.
158. St. George SM, Noriega Esquivas B, Agosto Y, *et al.* Development of a multigenerational digital lifestyle intervention for women cancer survivors and their families. *Psycho-Oncology* 2020;29(1):182-194.
159. Sommariva S, Vázquez-Otero C, Medina-Ramirez P, *et al.* Hispanic Male Cancer Survivors' Coping Strategies. *Hispanic Journal of Behavioral Sciences* 2019;41(2):267-284.
160. Stephens C, Stein K, Landrine H. The role of acculturation in life satisfaction among Hispanic cancer survivors: results of the American Cancer Society's study of cancer survivors. *Psychooncology* 2010;19(4):376-83.
161. Tobin J, Allem JP, Slaughter R, *et al.* Posttraumatic growth among childhood cancer survivors: Associations with ethnicity, acculturation, and religious service attendance. *J Psychosoc Oncol* 2017; 10.1080/07347332.2017.1365799:1-14.
162. Tobin J, Miller KA, Baezconde-Garbanati L, *et al.* Acculturation, Mental Health, and Quality of Life among Hispanic Childhood Cancer Survivors: A Latent Class Analysis. *Ethn Dis* 2018;28(1):55-60.
163. Togawa K, Ma H, Sullivan-Halley J, *et al.* Risk factors for self-reported arm lymphedema among female breast cancer survivors: a prospective cohort study. *Breast Cancer Res* 2014;16(4):414.
164. Voiss P, Hoxtermann MD, Dobos G, *et al.* Cancer, sleep problems, and mind-body medicine use: Results of the 2017 National Health Interview Survey. *Cancer* 2019;125(24):4490-4497.
165. Wang J, Sallfrank MF, Hong SH, *et al.* Patterns of reporting health-related quality of life across racial and ethnic groups. *Expert Review of Pharmacoeconomics and Outcomes Research* 2007;7(2):177-186.
166. Weis Farone D, Fitzpatrick TR, Bushfield SY. Hope, locus of control, and quality of health among elder Latina cancer survivors. *Soc Work Health Care* 2008;46(2):51-70.
167. Wildes KA, Miller AR, de Majors SS, *et al.* The religiosity/spirituality of Latina breast cancer survivors and influence on health-related quality of life. *Psychooncology* 2009;18(8):831-40.
168. Wildes KA, Miller AR, de Majors SS, *et al.* The satisfaction of Latina breast cancer survivors with their healthcare and health-related quality of life. *J Womens Health (Larchmt)* 2011;20(7):1065-74.

169. Wu C, Ashing KT, Jones VC, *et al.* The association of neighborhood context with health outcomes among ethnic minority breast cancer survivors. *J Behav Med* 2017; 10.1007/s10865-017-9875-6.
170. Yanez B, Maggard Gibbons M, Moreno PI, *et al.* Predictors of psychological outcomes in a longitudinal study of Latina breast cancer survivors. *Psychol Health* 2016;31(11):1359-74.
171. Yanez B, Thompson EH, Stanton AL. Quality of life among Latina breast cancer patients: a systematic review of the literature. *J Cancer Surviv* 2011;5(2):191-207.
172. Yanez B, Oswald LB, Baik SH, *et al.* Brief culturally informed smartphone interventions decrease breast cancer symptom burden among Latina breast cancer survivors. *Psycho-Oncology* 2020;29(1):195-203.
173. Yoo GJ, Levine EG, Pasick R. Breast cancer and coping among women of color: a systematic review of the literature. *Support Care Cancer* 2014;22(3):811-24.
174. Young K, Shliakhtsitsava K, Natarajan L, *et al.* Fertility counseling before cancer treatment and subsequent reproductive concerns among female adolescent and young adult cancer survivors. *Cancer* 2019;125(6):980-989.
175. Yu Q, Medeiros KL, Wu X, *et al.* Nonlinear Predictive Models for Multiple Mediation Analysis: With an Application to Explore Ethnic Disparities in Anxiety and Depression Among Cancer Survivors. *Psychometrika* 2018;83(4):991-1006.
176. Zhou ES, Clark K, Recklitis CJ, *et al.* Sleepless from the get go: Sleep problems prior to initiating cancer treatment. *International Journal of Behavioral Medicine* 2018;25(5):502-516.
